# Supplementary material for: The Gut-Muscle Axis in Older Subjects with Low Muscle Mass and Performance: A Proof of Concept Study Exploring Fecal Microbiota Composition and Function with Shotgun Metagenomics Sequencing
Source: MDPI journal article supplement (doi:10.3390/ijms21238946), 2020-11-25
Supplement: s1 [file s1]

## Taxonomy

Actinobacteria;Bifidobacteriales;Bifidobacteriaceae;Bifidobacterium  
Actinobacteria;Bifidobacteriales;Bifidobacteriaceae;Bifidobacterium  
Actinobacteria;Bifidobacteriales;Bifidobacteriaceae;Bifidobacterium  
Actinobacteria;Bifidobacteriales;Bifidobacteriaceae;Bifidobacterium  
Actinobacteria;Bifidobacteriales;Bifidobacteriaceae;Bifidobacterium  
Actinobacteria;Bifidobacteriales;Bifidobacteriaceae;Bifidobacterium  
Actinobacteria;Bifidobacteriales;Bifidobacteriaceae;Bifidobacterium  
Actinobacteria;Coriobacteriales;Atopobiaceae;Olsenella  
Actinobacteria;Coriobacteriales;Coriobacteriaceae;Collinsella  
Actinobacteria;Coriobacteriales;Coriobacteriaceae;Collinsella  
Actinobacteria;Coriobacteriales;Coriobacteriaceae;Enorma  
Actinobacteria;Coriobacteriales;Coriobacteriaceae;Enorma  
Actinobacteria;Coriobacteriales;Eggerthellaceae;Eggerthella  
Actinobacteria;Coriobacteriales;Eggerthellaceae;Eggerthella  
Actinobacteria;Coriobacteriales;Eggerthellaceae;Gordonibacter  
Actinobacteria;Coriobacteriales;Eggerthellaceae;Senegalimassilia  
Actinobacteria;Coriobacteriales;Eggerthellaceae;Senegalimassilia  
Actinobacteria;Coriobacteriales;Eggerthellaceae;Slackia  
Actinobacteria;Coriobacteriales;Eggerthellaceae;Slackia  
Bacteroidetes;Bacteroidales;Bacteroidaceae;Bacteroides  
Bacteroidetes;Bacteroidales;Bacteroidaceae;Bacteroides

## Taxonomy

Bifidobacterium adolescentis  
Bifidobacterium bifidum  
Bifidobacterium breve  
Bifidobacterium catenulatum  
Bifidobacterium dentium  
Bifidobacterium longum  
Bifidobacterium pseudocatenulatum  
Bifidobacterium unknown\_species  
Olsenella unknown\_species  
Collinsella aerofaciens  
Collinsella unknown\_species  
Enorma massiliensis  
Enorma unknown\_species  
Eggerthella lenta  
Eggerthella unknown\_species  
Gordonibacter unknown\_species  
Senegalimassilia anaerobia  
Senegalimassilia unknown\_species  
Slackia isoflavoniconvertens  
Slackia unknown\_species  
Bacteroides acidifaciens  
Bacteroides barnesiae  
Bacteroides caccae  
Bacteroides caecimuris  
Bacteroides cellulosilyticus  
Bacteroides clarus  
Bacteroides congonensis  
Bacteroides coprocola  
Bacteroides coprophilus  
Bacteroides dorei  
Bacteroides eggerthii  
Bacteroides faecis  
Bacteroides finegoldii  
Bacteroides fluxus  
Bacteroides fragilis  
Bacteroides intestinalis  
Bacteroides massiliensis  
Bacteroides nordii  
Bacteroides ovatus  
Bacteroides plebeius  
Bacteroides salyersiae

Bacteroidetes;Bacteroidales;Bacteroidaceae;Bacteroides  
Bacteroidetes;Bacteroidales;Bacteroidaceae;Bacteroides  
Bacteroidetes;Bacteroidales;Bacteroidaceae;Bacteroides  
Bacteroidetes;Bacteroidales;Bacteroidaceae;Bacteroides  
Bacteroidetes;Bacteroidales;Bacteroidaceae;Bacteroides  
Bacteroidetes;Bacteroidales;Bacteroidaceae;Bacteroides  
Bacteroidetes;Bacteroidales;Bacteroidaceae;Bacteroides  
Bacteroidetes;Bacteroidales;Barnesiellaceae;Barnesiella  
Bacteroidetes;Bacteroidales;Barnesiellaceae;Barnesiella  
Bacteroidetes;Bacteroidales;Barnesiellaceae;Coprobacter  
Bacteroidetes;Bacteroidales;Marinifilaceae;Butyricimonas  
Bacteroidetes;Bacteroidales;Marinifilaceae;Butyricimonas  
Bacteroidetes;Bacteroidales;Marinifilaceae;Butyricimonas  
Bacteroidetes;Bacteroidales;Marinifilaceae;Butyricimonas  
Bacteroidetes;Bacteroidales;Marinifilaceae;Odoribacter  
Bacteroidetes;Bacteroidales;Marinifilaceae;Odoribacter  
Bacteroidetes;Bacteroidales;Muribaculaceae;Duncaniella  
Bacteroidetes;Bacteroidales;Muribaculaceae;Duncaniella  
Bacteroidetes;Bacteroidales;Muribaculaceae;Muribaculum  
Bacteroidetes;Bacteroidales;Muribaculaceae;Muribaculum  
Bacteroidetes;Bacteroidales;Muribaculaceae;Paramuribaculum  
Bacteroidetes;Bacteroidales;Porphyromonadaceae;Gabonia  
Bacteroidetes;Bacteroidales;Porphyromonadaceae;Porphyromonas  
Bacteroidetes;Bacteroidales;Prevotellaceae;Paraprevotella  
Bacteroidetes;Bacteroidales;Prevotellaceae;Paraprevotella  
Bacteroidetes;Bacteroidales;Prevotellaceae;Paraprevotella  
Bacteroidetes;Bacteroidales;Prevotellaceae;Prevotella  
Bacteroidetes;Bacteroidales;Prevotellaceae;Prevotella  
Bacteroidetes;Bacteroidales;Prevotellaceae;Prevotella  
Bacteroidetes;Bacteroidales;Prevotellaceae;Prevotella  
Bacteroidetes;Bacteroidales;Prevotellaceae;Prevotella  
Bacteroidetes;Bacteroidales;Prevotellaceae;Prevotella  
Bacteroidetes;Bacteroidales;Prevotellaceae;Prevotella  
Bacteroidetes;Bacteroidales;Prevotellaceae;Prevotellamassilia  
Bacteroidetes;Bacteroidales;Prevotellaceae;Prevotellamassilia  
Bacteroidetes;Bacteroidales;Rikenellaceae;Alistipes  
Bacteroidetes;Bacteroidales;Rikenellaceae;Alistipes  
Bacteroidetes;Bacteroidales;Rikenellaceae;Alistipes  
Bacteroidetes;Bacteroidales;Rikenellaceae;Alistipes  
Bacteroidetes;Bacteroidales;Rikenellaceae;Alistipes  
Bacteroidetes;Bacteroidales;Rikenellaceae;Alistipes  
Bacteroidetes;Bacteroidales;Rikenellaceae;Alistipes  
Bacteroidetes;Bacteroidales;Rikenellaceae;Alistipes

Bacteroides sartorii  
Bacteroides stercoris  
Bacteroides thetaiotaomicron  
Bacteroides uniformis  
Bacteroides unknown\_species  
Bacteroides vulgatus  
Bacteroides xylanisolvens  
Barnesiella intestinihominis  
Barnesiella unknown\_species  
Coprobacter fastidiosus  
Butyricimonas faecalis  
Butyricimonas faecihominis  
Butyricimonas unknown\_species  
Butyricimonas virosa  
Odoribacter splanchnicus  
Odoribacter unknown\_species  
Duncaniella muris  
Duncaniella unknown\_species  
Muribaculum intestinale  
Muribaculum unknown\_species  
Paramuribaculum unknown\_species  
Gabonia massiliensis  
Porphyromonas somerae  
Paraprevotella clara  
Paraprevotella unknown\_species  
Paraprevotella xylaniphila  
Prevotella bivia  
Prevotella copri  
Prevotella intermedia  
Prevotella rara  
Prevotella stercorea  
Prevotella timonensis  
Prevotella unknown\_species  
Prevotellamassilia timonensis  
Prevotellamassilia unknown\_species  
Alistipes finegoldii  
Alistipes ihumii  
Alistipes indistinctus  
Alistipes inops  
Alistipes megaguti  
Alistipes onderdonkii  
Alistipes provencensis

|                                                                                       |                                    |
|---------------------------------------------------------------------------------------|------------------------------------|
| Bacteroidetes;Bacteroidales;Rikenellaceae;Alistipes                                   | Alistipes putredinis               |
| Bacteroidetes;Bacteroidales;Rikenellaceae;Alistipes                                   | Alistipes senegalensis             |
| Bacteroidetes;Bacteroidales;Rikenellaceae;Alistipes                                   | Alistipes shahii                   |
| Bacteroidetes;Bacteroidales;Rikenellaceae;Alistipes                                   | Alistipes unknown_species          |
| Bacteroidetes;Bacteroidales;Rikenellaceae;Rikenella                                   | Rikenella microfus                 |
| Bacteroidetes;Bacteroidales;Tannerellaceae;Parabacteroides                            | Parabacteroides distasonis         |
| Bacteroidetes;Bacteroidales;Tannerellaceae;Parabacteroides                            | Parabacteroides goldsteinii        |
| Bacteroidetes;Bacteroidales;Tannerellaceae;Parabacteroides                            | Parabacteroides johnsonii          |
| Bacteroidetes;Bacteroidales;Tannerellaceae;Parabacteroides                            | Parabacteroides merdae             |
| Bacteroidetes;Bacteroidales;Tannerellaceae;Parabacteroides                            | Parabacteroides unknown_species    |
| Firmicutes;Bacillales;Staphylococcaceae;Staphylococcus                                | Staphylococcus aureus              |
| Firmicutes;Clostridiales;Christensenellaceae;Catabacter                               | Catabacter unknown_species         |
| Firmicutes;Clostridiales;Christensenellaceae;Christensenella                          | Christensenella unknown_species    |
| Firmicutes;Clostridiales;Clostridiaceae;Clostridium                                   | Clostridium phoceensis             |
| Firmicutes;Clostridiales;Clostridiaceae;Clostridium                                   | Clostridium unknown_species        |
| Firmicutes;Clostridiales;Clostridiales Family XIII. Incertae Sedis;Bacilliculturomica | Bacilliculturomica unknown_species |
| Firmicutes;Clostridiales;Clostridiales Family XIII. Incertae Sedis;Emergencia         | Emergencia unknown_species         |
| Firmicutes;Clostridiales;Clostridiales Family XIII. Incertae Sedis;Eubacterium        | [Eubacterium] unknown_species      |
| Firmicutes;Clostridiales;Clostridiales incertae sedis;Bacteroides                     | [Bacteroides] pectinophilus        |
| Firmicutes;Clostridiales;Clostridiales incertae sedis;Bacteroides                     | [Bacteroides] unknown_species      |
| Firmicutes;Clostridiales;Clostridiales incertae sedis;Evtepia                         | Evtepia gabavorous                 |
| Firmicutes;Clostridiales;Clostridiales incertae sedis;Evtepia                         | Evtepia unknown_species            |
| Firmicutes;Clostridiales;Eubacteriaceae;Eubacterium                                   | Eubacterium ramulus                |
| Firmicutes;Clostridiales;Eubacteriaceae;Eubacterium                                   | Eubacterium unknown_species        |
| Firmicutes;Clostridiales;Eubacteriaceae;Eubacterium                                   | Eubacterium ventriosum             |
| Firmicutes;Clostridiales;Lachnospiraceae;Anaerobutyricum                              | Anaerobutyricum hallii             |
| Firmicutes;Clostridiales;Lachnospiraceae;Anaerostipes                                 | Anaerostipes hadrus                |
| Firmicutes;Clostridiales;Lachnospiraceae;Anaerotignum                                 | Anaerotignum faecicola             |
| Firmicutes;Clostridiales;Lachnospiraceae;Anaerotignum                                 | Anaerotignum lactatifermentans     |
| Firmicutes;Clostridiales;Lachnospiraceae;Anaerotignum                                 | Anaerotignum unknown_species       |
| Firmicutes;Clostridiales;Lachnospiraceae;Blautia                                      | Blautia massiliensis               |
| Firmicutes;Clostridiales;Lachnospiraceae;Blautia                                      | Blautia obeum                      |
| Firmicutes;Clostridiales;Lachnospiraceae;Blautia                                      | Blautia unknown_species            |
| Firmicutes;Clostridiales;Lachnospiraceae;Blautia                                      | Blautia wexlerae                   |
| Firmicutes;Clostridiales;Lachnospiraceae;Butyrivibrio                                 | Butyrivibrio unknown_species       |
| Firmicutes;Clostridiales;Lachnospiraceae;Coprococcus                                  | Coprococcus comes                  |
| Firmicutes;Clostridiales;Lachnospiraceae;Coprococcus                                  | Coprococcus eutactus               |
| Firmicutes;Clostridiales;Lachnospiraceae;Coprococcus                                  | Coprococcus phoceensis             |
| Firmicutes;Clostridiales;Lachnospiraceae;Coprococcus                                  | Coprococcus unknown_species        |
| Firmicutes;Clostridiales;Lachnospiraceae;Dorea                                        | Dorea formicigenerans              |
| Firmicutes;Clostridiales;Lachnospiraceae;Dorea                                        | Dorea longicatena                  |
| Firmicutes;Clostridiales;Lachnospiraceae;Dorea                                        | Dorea unknown_species              |

|                                                             |                                    |
|-------------------------------------------------------------|------------------------------------|
| Firmicutes;Clostridiales;Lachnospiraceae;Eisenbergiella     | Eisenbergiella massiliensis        |
| Firmicutes;Clostridiales;Lachnospiraceae;Eisenbergiella     | Eisenbergiella tayi                |
| Firmicutes;Clostridiales;Lachnospiraceae;Eisenbergiella     | Eisenbergiella unknown_species     |
| Firmicutes;Clostridiales;Lachnospiraceae;Enterocloster      | [Clostridium] asparagiforme        |
| Firmicutes;Clostridiales;Lachnospiraceae;Enterocloster      | [Clostridium] bolteae              |
| Firmicutes;Clostridiales;Lachnospiraceae;Enterocloster      | [Clostridium] clostridioforme      |
| Firmicutes;Clostridiales;Lachnospiraceae;Enterocloster      | [Clostridium] unknown_species      |
| Firmicutes;Clostridiales;Lachnospiraceae;Eubacterium        | [Eubacterium] rectale              |
| Firmicutes;Clostridiales;Lachnospiraceae;Faecalimonas       | Faecalimonas unknown_species       |
| Firmicutes;Clostridiales;Lachnospiraceae;Hungatella         | Hungatella effluvii                |
| Firmicutes;Clostridiales;Lachnospiraceae;Hungatella         | Hungatella hathewayi               |
| Firmicutes;Clostridiales;Lachnospiraceae;Hungatella         | Hungatella unknown_species         |
| Firmicutes;Clostridiales;Lachnospiraceae;Kineothrix         | Kineothrix unknown_species         |
| Firmicutes;Clostridiales;Lachnospiraceae;Lachnoclostridium  | [Clostridium] scindens             |
| Firmicutes;Clostridiales;Lachnospiraceae;Lachnoclostridium  | [Clostridium] symbiosum            |
| Firmicutes;Clostridiales;Lachnospiraceae;Lachnospira        | Lachnospira unknown_species        |
| Firmicutes;Clostridiales;Lachnospiraceae;Marvinbryantia     | Marvinbryantia unknown_species     |
| Firmicutes;Clostridiales;Lachnospiraceae;Mediterraneibacter | [Ruminococcus] gnavus              |
| Firmicutes;Clostridiales;Lachnospiraceae;Mediterraneibacter | [Ruminococcus] torques             |
| Firmicutes;Clostridiales;Lachnospiraceae;Mediterraneibacter | [Ruminococcus] unknown_species     |
| Firmicutes;Clostridiales;Lachnospiraceae;Mediterraneibacter | Mediterraneibacter unknown_species |
| Firmicutes;Clostridiales;Lachnospiraceae;Merdimonas         | Merdimonas unknown_species         |
| Firmicutes;Clostridiales;Lachnospiraceae;Roseburia          | Roseburia hominis                  |
| Firmicutes;Clostridiales;Lachnospiraceae;Roseburia          | Roseburia intestinalis             |
| Firmicutes;Clostridiales;Lachnospiraceae;Roseburia          | Roseburia inulinivorans            |
| Firmicutes;Clostridiales;Lachnospiraceae;Roseburia          | Roseburia unknown_species          |
| Firmicutes;Clostridiales;Lachnospiraceae;Sellimonas         | Sellimonas intestinalis            |
| Firmicutes;Clostridiales;Oscillospiraceae;Dysosmobacter     | Dysosmobacter unknown_species      |
| Firmicutes;Clostridiales;Oscillospiraceae;Dysosmobacter     | Dysosmobacter welbionis            |
| Firmicutes;Clostridiales;Ruminococcaceae;Acutalibacter      | Acutalibacter unknown_species      |
| Firmicutes;Clostridiales;Ruminococcaceae;Agathobaculum      | Agathobaculum butyriciproducens    |
| Firmicutes;Clostridiales;Ruminococcaceae;Agathobaculum      | Agathobaculum unknown_species      |
| Firmicutes;Clostridiales;Ruminococcaceae;Anaerotruncus      | Anaerotruncus colihominis          |
| Firmicutes;Clostridiales;Ruminococcaceae;Anaerotruncus      | Anaerotruncus massiliensis         |
| Firmicutes;Clostridiales;Ruminococcaceae;Anaerotruncus      | Anaerotruncus rubiinfantis         |
| Firmicutes;Clostridiales;Ruminococcaceae;Anaerotruncus      | Anaerotruncus unknown_species      |
| Firmicutes;Clostridiales;Ruminococcaceae;Bittarella         | Bittarella massiliensis            |
| Firmicutes;Clostridiales;Ruminococcaceae;Bittarella         | Bittarella unknown_species         |
| Firmicutes;Clostridiales;Ruminococcaceae;Butyricicoccus     | Butyricicoccus pullicaecorum       |
| Firmicutes;Clostridiales;Ruminococcaceae;Butyricicoccus     | Butyricicoccus unknown_species     |
| Firmicutes;Clostridiales;Ruminococcaceae;Caprobacter        | Caprobacter unknown_species        |
| Firmicutes;Clostridiales;Ruminococcaceae;Clostridium        | [Clostridium] leptum               |

|                                                                          |                                      |
|--------------------------------------------------------------------------|--------------------------------------|
| Firmicutes;Clostridiales;Ruminococcaceae;Eubacterium                     | [Eubacterium] siraeum                |
| Firmicutes;Clostridiales;Ruminococcaceae;Faecalibacterium                | Faecalibacterium prausnitzii         |
| Firmicutes;Clostridiales;Ruminococcaceae;Faecalibacterium                | Faecalibacterium unknown_species     |
| Firmicutes;Clostridiales;Ruminococcaceae;Flavonifractor                  | Flavonifractor plautii               |
| Firmicutes;Clostridiales;Ruminococcaceae;Flavonifractor                  | Flavonifractor unknown_species       |
| Firmicutes;Clostridiales;Ruminococcaceae;Fournierella                    | Fournierella massiliensis            |
| Firmicutes;Clostridiales;Ruminococcaceae;Fournierella                    | Fournierella unknown_species         |
| Firmicutes;Clostridiales;Ruminococcaceae;Gemmiger                        | Gemmiger formicilis                  |
| Firmicutes;Clostridiales;Ruminococcaceae;Gemmiger                        | Gemmiger unknown_species             |
| Firmicutes;Clostridiales;Ruminococcaceae;Intestinimonas                  | Intestinimonas butyriciproducens     |
| Firmicutes;Clostridiales;Ruminococcaceae;Intestinimonas                  | Intestinimonas massiliensis          |
| Firmicutes;Clostridiales;Ruminococcaceae;Intestinimonas                  | Intestinimonas unknown_species       |
| Firmicutes;Clostridiales;Ruminococcaceae;Massilimaliae                   | Massilimaliae unknown_species        |
| Firmicutes;Clostridiales;Ruminococcaceae;Neglecta                        | Neglecta timonensis                  |
| Firmicutes;Clostridiales;Ruminococcaceae;Neglecta                        | Neglecta unknown_species             |
| Firmicutes;Clostridiales;Ruminococcaceae;Neobittarella                   | Neobittarella unknown_species        |
| Firmicutes;Clostridiales;Ruminococcaceae;Phoceia                         | Phoceia unknown_species              |
| Firmicutes;Clostridiales;Ruminococcaceae;Pseudoflavonifractor            | Pseudoflavonifractor capillosus      |
| Firmicutes;Clostridiales;Ruminococcaceae;Pseudoflavonifractor            | Pseudoflavonifractor unknown_species |
| Firmicutes;Clostridiales;Ruminococcaceae;Pseudoruminococcus              | Pseudoruminococcus unknown_species   |
| Firmicutes;Clostridiales;Ruminococcaceae;Ruminococcus                    | Ruminococcus bicirculans             |
| Firmicutes;Clostridiales;Ruminococcaceae;Ruminococcus                    | Ruminococcus bromii                  |
| Firmicutes;Clostridiales;Ruminococcaceae;Ruminococcus                    | Ruminococcus callidus                |
| Firmicutes;Clostridiales;Ruminococcaceae;Ruminococcus                    | Ruminococcus faecis                  |
| Firmicutes;Clostridiales;Ruminococcaceae;Ruminococcus                    | Ruminococcus lactaris                |
| Firmicutes;Clostridiales;Ruminococcaceae;Ruminococcus                    | Ruminococcus unknown_species         |
| Firmicutes;Clostridiales;Ruminococcaceae;Ruthenibacterium                | Ruthenibacterium lactatiformans      |
| Firmicutes;Clostridiales;Ruminococcaceae;Ruthenibacterium                | Ruthenibacterium unknown_species     |
| Firmicutes;Clostridiales;Ruminococcaceae;Subdoligranulum                 | Subdoligranulum unknown_species      |
| Firmicutes;Clostridiales;Ruminococcaceae;Subdoligranulum                 | Subdoligranulum variabile            |
| Firmicutes;Erysipelotrichales;Erysipelotrichaceae;Coprobacillus          | Coprobacillus cateniformis           |
| Firmicutes;Erysipelotrichales;Erysipelotrichaceae;Erysipelatoclostridium | [Clostridium] saccharogumia          |
| Firmicutes;Erysipelotrichales;Erysipelotrichaceae;Erysipelatoclostridium | Erysipelatoclostridium ramosum       |
| Firmicutes;Erysipelotrichales;Erysipelotrichaceae;Faecalibacillus        | Faecalibacillus intestinalis         |
| Firmicutes;Erysipelotrichales;Erysipelotrichaceae;Faecalicoccus          | Faecalicoccus pleomorphus            |
| Firmicutes;Erysipelotrichales;Erysipelotrichaceae;Faecalicoccus          | Faecalicoccus unknown_species        |
| Firmicutes;Erysipelotrichales;Erysipelotrichaceae;Faecalitalea           | Faecalitalea cylindroides            |
| Firmicutes;Erysipelotrichales;Erysipelotrichaceae;Holdemania             | Holdemania filiformis                |
| Firmicutes;Erysipelotrichales;Erysipelotrichaceae;Sharpea                | Sharpea unknown_species              |
| Firmicutes;Lactobacillales;Lactobacillaceae;Lactobacillus                | Lactobacillus unknown_species        |
| Firmicutes;Lactobacillales;Streptococcaceae;Streptococcus                | Streptococcus anginosus              |
| Firmicutes;Lactobacillales;Streptococcaceae;Streptococcus                | Streptococcus gordonii               |

|                                                                      |                                       |
|----------------------------------------------------------------------|---------------------------------------|
| Firmicutes;Lactobacillales;Streptococcaceae;Streptococcus            | Streptococcus mutans                  |
| Firmicutes;Lactobacillales;Streptococcaceae;Streptococcus            | Streptococcus parasanguinis           |
| Firmicutes;Lactobacillales;Streptococcaceae;Streptococcus            | Streptococcus pyogenes                |
| Firmicutes;Lactobacillales;Streptococcaceae;Streptococcus            | Streptococcus salivarius              |
| Firmicutes;Lactobacillales;Streptococcaceae;Streptococcus            | Streptococcus thermophilus            |
| Firmicutes;Lactobacillales;Streptococcaceae;Streptococcus            | Streptococcus unknown_species         |
| Firmicutes;Lactobacillales;Streptococcaceae;Streptococcus            | Streptococcus vestibularis            |
| Firmicutes;Selenomonadales;Acidaminococcaceae;Acidaminococcus        | Acidaminococcus fermentans            |
| Firmicutes;Selenomonadales;Acidaminococcaceae;Acidaminococcus        | Acidaminococcus massiliensis          |
| Firmicutes;Selenomonadales;Acidaminococcaceae;Acidaminococcus        | Acidaminococcus unknown_species       |
| Firmicutes;Selenomonadales;Acidaminococcaceae;Phascolarctobacterium  | Phascolarctobacterium faecium         |
| Firmicutes;Selenomonadales;Acidaminococcaceae;Phascolarctobacterium  | Phascolarctobacterium succinatutens   |
| Firmicutes;Selenomonadales;Acidaminococcaceae;Phascolarctobacterium  | Phascolarctobacterium unknown_species |
| Firmicutes;Selenomonadales;Veillonellaceae;Dialister                 | Dialister succinatiphilus             |
| Firmicutes;Selenomonadales;Veillonellaceae;Dialister                 | Dialister unknown_species             |
| Firmicutes;Selenomonadales;Veillonellaceae;Selenomonas               | Selenomonas unknown_species           |
| Firmicutes;Selenomonadales;Veillonellaceae;Veillonella               | Veillonella atypica                   |
| Firmicutes;Selenomonadales;Veillonellaceae;Veillonella               | Veillonella dispar                    |
| Firmicutes;Selenomonadales;Veillonellaceae;Veillonella               | Veillonella parvula                   |
| Firmicutes;Selenomonadales;Veillonellaceae;Veillonella               | Veillonella rogosae                   |
| Firmicutes;Selenomonadales;Veillonellaceae;Veillonella               | Veillonella tobetsuensis              |
| Firmicutes;Selenomonadales;Veillonellaceae;Veillonella               | Veillonella unknown_species           |
| Firmicutes;Veillonellales;Veillonellaceae;Colibacter                 | Colibacter unknown_species            |
| Fusobacteria;Fusobacteriales;Fusobacteriaceae;Fusobacterium          | Fusobacterium unknown_species         |
| Lentisphaerae;Victivallales;Victivallaceae;Victivallis               | Victivallis unknown_species           |
| Lentisphaerae;Victivallales;Victivallaceae;Victivallis               | Victivallis vadensis                  |
| Proteobacteria;Aeromonadales;Succinivibrionaceae;Succinatimonas      | Succinatimonas unknown_species        |
| Proteobacteria;Betaproteobacteriales;Burkholderiaceae;Parasutterella | Parasutterella excrementihominis      |
| Proteobacteria;Betaproteobacteriales;Burkholderiaceae;Parasutterella | Parasutterella unknown_species        |
| Proteobacteria;Betaproteobacteriales;Burkholderiaceae;Sutterella     | Sutterella unknown_species            |
| Proteobacteria;Betaproteobacteriales;Burkholderiaceae;Sutterella     | Sutterella wadsworthensis             |
| Proteobacteria;Burkholderiales;Sutterellaceae;Dakarella              | Dakarella massiliensis                |
| Proteobacteria;Desulfovibrionales;Desulfovibrionaceae;Bilophila      | Bilophila unknown_species             |
| Proteobacteria;Desulfovibrionales;Desulfovibrionaceae;Bilophila      | Bilophila wadsworthia                 |
| Proteobacteria;Desulfovibrionales;Desulfovibrionaceae;Desulfovibrio  | Desulfovibrio piger                   |
| Proteobacteria;Desulfovibrionales;Desulfovibrionaceae;Desulfovibrio  | Desulfovibrio unknown_species         |
| Proteobacteria;Enterobacteriales;Enterobacteriaceae;Escherichia      | Escherichia coli                      |
| Proteobacteria;Enterobacteriales;Enterobacteriaceae;Enterobacter     | Enterobacter hormaechei               |
| Proteobacteria;Enterobacteriales;Enterobacteriaceae;Klebsiella       | Klebsiella oxytoca                    |
| Proteobacteria;Pasteurellales;Pasteurellaceae;Haemophilus            | Haemophilus parainfluenzae            |
| Proteobacteria;Pasteurellales;Pasteurellaceae;Haemophilus            | Haemophilus unknown_species           |
| Synergistetes;Synergistales;Synergistaceae;Cloacibacillus            | Cloacibacillus evryensis              |

Tenericutes;Mycoplasmatales;Mycoplasmataceae;Mycoplasma  
Verrucomicrobia;Verrucomicrobiales;Akkermansiaceae;Akkermansia  
Verrucomicrobia;Verrucomicrobiales;Akkermansiaceae;Akkermansia

Mycoplasma unknown\_species  
Akkermansia muciniphila  
Akkermansia unknown\_species
