# Supplementary material for: The Gut-Muscle Axis in Older Subjects with Low Muscle Mass and Performance: A Proof of Concept Study Exploring Fecal Microbiota Composition and Function with Shotgun Metagenomics Sequencing
Source: MDPI journal article supplement (doi:10.3390/ijms21238946), 2020-11-25
Supplement: s1 [file s1]

| MetaCyc Pathways ID        | MetaCyc Pathways name                                                         | Average |       | Std. Deviation |       | p-value     |
|----------------------------|-------------------------------------------------------------------------------|---------|-------|----------------|-------|-------------|
|                            |                                                                               | SB      | SBCT  | SB             | SBCT  |             |
| PWY-5946                   | &alpha;-carotene biosynthesis                                                 | 0,13%   | 0,18% | 0,03%          | 0,04% | 0,049973902 |
| PWY-7586                   | &beta;-1,4-D-mannosyl-<i>N</i>-acetyl-D-glucosamine degradation               | 0,04%   | 0,01% | 0,03%          | 0,02% | 0,027313679 |
| PWY-3941                   | &beta;-alanine biosynthesis II                                                | 0,02%   | 0,06% | 0,02%          | 0,03% | 0,02398539  |
| PWY-7654                   | (8<i>E</i>,10<i>E</i>)-dodeca-8,10-dienol biosynthesis                        | 0,02%   | 0,06% | 0,02%          | 0,03% | 0,02398539  |
| PWY-7905                   | <i>Escherichia coli</i> serotype O9a <i>O</i>-antigen biosynthesis            | 0,00%   | 0,01% | 0,00%          | 0,01% | 0,046263129 |
| PWY-7656                   | <i>Spodoptera littoralis</i> pheromone biosynthesis                           | 0,02%   | 0,06% | 0,02%          | 0,03% | 0,02398539  |
| PWY-7778                   | 2-methylpropene degradation                                                   | 0,30%   | 0,21% | 0,06%          | 0,06% | 0,014542543 |
| PWY-7465                   | 3,3'-thiodipropionate degradation                                             | 0,01%   | 0,05% | 0,02%          | 0,03% | 0,01453041  |
| CHLOROPHYLL-SYN            | 3,8-divinyl-chlorophyllide <i>a</i> biosynthesis I (aerobic, light-dependent) | 0,01%   | 0,02% | 0,01%          | 0,02% | 0,029223463 |
| PWY-5979                   | 3-amino-5-hydroxybenzoate biosynthesis                                        | 0,06%   | 0,10% | 0,04%          | 0,03% | 0,032514653 |
| PWY-5022                   | 4-aminobutanoate degradation V                                                | 0,03%   | 0,07% | 0,04%          | 0,03% | 0,025183448 |
| PWY-5645                   | 4-chloronitrobenzene degradation                                              | 0,04%   | 0,02% | 0,02%          | 0,01% | 0,031625262 |
| PWY-7811                   | 6-methylpretetramide biosynthesis                                             | 0,00%   | 0,01% | 0,00%          | 0,01% | 0,007547292 |
| PWY-5676                   | acetyl-CoA fermentation to butanoate II                                       | 0,23%   | 0,32% | 0,06%          | 0,08% | 0,036181089 |
| PWY-7384                   | anaerobic energy metabolism (invertebrates, mitochondrial)                    | 0,00%   | 0,02% | 0,01%          | 0,02% | 0,028367428 |
| PWY-7725                   | arachidonate biosynthesis V (8-detaturase, mammals)                           | 0,04%   | 0,02% | 0,02%          | 0,01% | 0,031625262 |
| PWY-6421                   | arsenate detoxification IV (mycothiol)                                        | 0,02%   | 0,06% | 0,02%          | 0,03% | 0,02398539  |
| PWY-7402                   | benzoate fermentation (to acetate and cyclohexane carboxylate)                | 0,02%   | 0,06% | 0,02%          | 0,03% | 0,023500193 |
| P321-PWY                   | benzoyl-CoA degradation III (anaerobic)                                       | 0,03%   | 0,06% | 0,03%          | 0,02% | 0,035275326 |
| PWY-8129                   | cell-surface glycoconjugate-linked phosphonate biosynthesis                   | 0,02%   | 0,06% | 0,02%          | 0,03% | 0,023500193 |
| PWY-1001                   | cellulose biosynthesis                                                        | 0,03%   | 0,01% | 0,03%          | 0,01% | 0,013150528 |
| PWY-6788                   | cellulose degradation II (fungi)                                              | 0,05%   | 0,10% | 0,03%          | 0,03% | 0,020673276 |
| PWY18C3-7                  | cembratrienediol biosynthesis                                                 | 0,09%   | 0,15% | 0,06%          | 0,04% | 0,01684912  |
| PWY-7118                   | chitin deacetylation                                                          | 0,05%   | 0,10% | 0,03%          | 0,03% | 0,018255672 |
| PWY-6906                   | chitin derivatives degradation                                                | 0,01%   | 0,04% | 0,01%          | 0,02% | 0,001752889 |
| PWY-6670                   | citronellol degradation                                                       | 0,02%   | 0,06% | 0,02%          | 0,03% | 0,02398539  |
| PWY-7865                   | coenzyme B/coenzyme M regeneration II (ferredoxin-dependent)                  | 0,00%   | 0,01% | 0,00%          | 0,01% | 0,027530881 |
| COLANSYN-PWY               | colanic acid building blocks biosynthesis                                     | 0,55%   | 0,36% | 0,25%          | 0,11% | 0,049524916 |
| CYCLOHEXANOL-OXIDATION-PWY | cyclohexanol degradation                                                      | 0,00%   | 0,00% | 0,00%          | 0,01% | 0,030561846 |
| PWY-2343                   | daidzein conjugates interconversion                                           | 0,34%   | 0,41% | 0,03%          | 0,07% | 0,048111734 |
| PWY-8091                   | D-apionate degradation I (xylose isomerase family decarboxylase)              | 0,00%   | 0,01% | 0,00%          | 0,01% | 0,023095509 |
| PWY-8090                   | D-apionate degradation II (RLP decarboxylase)                                 | 0,00%   | 0,01% | 0,00%          | 0,01% | 0,031809811 |
| PWY-7712                   | deoxynivalenol biosynthesis                                                   | 0,00%   | 0,01% | 0,00%          | 0,01% | 0,042974793 |
| PWY-6499                   | D-glucarate degradation II                                                    | 0,00%   | 0,01% | 0,00%          | 0,01% | 0,041460075 |
| P224-PWY                   | dissimilatory sulfate reduction II (to thiosulfate)                           | 0,08%   | 0,12% | 0,03%          | 0,04% | 0,020149944 |
| PWY-7300                   | ecdysone and 20-hydroxyecdysone biosynthesis                                  | 0,02%   | 0,06% | 0,02%          | 0,03% | 0,02398539  |
| PWY-5109                   | fermentation to 2-methylbutanoate                                             | 0,02%   | 0,06% | 0,02%          | 0,03% | 0,02398539  |
| RIBOSYN2-PWY               | flavin biosynthesis I (bacteria and plants)                                   | 0,05%   | 0,11% | 0,04%          | 0,04% | 0,018008414 |
| PWY-6167                   | flavin biosynthesis II (archaea)                                              | 0,02%   | 0,05% | 0,01%          | 0,03% | 0,03402742  |
| P3-PWY                     | gallate degradation III (anaerobic)                                           | 0,02%   | 0,06% | 0,02%          | 0,03% | 0,02398539  |
| PWY-5122                   | geranyl diphosphate biosynthesis                                              | 0,00%   | 0,03% | 0,01%          | 0,02% | 0,035887082 |
| GLYCOLYSIS                 | glycolysis I (from glucose 6-phosphate)                                       | 0,85%   | 0,64% | 0,21%          | 0,09% | 0,009688636 |
| P341-PWY                   | glycolysis V (Pyrococcus)                                                     | 0,42%   | 0,31% | 0,10%          | 0,05% | 0,00815046  |

|                             |                                                                                        |       |       |       |       |             |
|-----------------------------|----------------------------------------------------------------------------------------|-------|-------|-------|-------|-------------|
| PWY-6599                    | guanine and guanosine salvage II                                                       | 0,03% | 0,06% | 0,02% | 0,03% | 0,011163342 |
| PWY-7221                    | guanosine ribonucleotides <i>de novo</i> biosynthesis                                  | 0,02% | 0,06% | 0,02% | 0,03% | 0,02398539  |
| PWY-7027                    | hentriaconta-3,6,9,12,15,19,22,25,28-nonaene biosynthesis                              | 0,08% | 0,12% | 0,03% | 0,04% | 0,020149944 |
| PWY-5382                    | hydrogen oxidation II (aerobic, NAD)                                                   | 0,00% | 0,00% | 0,00% | 0,01% | 0,046036941 |
| PWY0-1578                   | hydrogen to trimethylamine N-oxide electron transfer                                   | 0,04% | 0,08% | 0,03% | 0,04% | 0,045965556 |
| PWY-6910                    | hydroxymethylpyrimidine salvage                                                        | 0,02% | 0,06% | 0,02% | 0,03% | 0,02398539  |
| PWY-581                     | indole-3-acetate biosynthesis II                                                       | 0,01% | 0,04% | 0,01% | 0,02% | 0,007285283 |
| GLUTAMINDEG-PWY             | L-glutamine degradation I                                                              | 0,59% | 0,70% | 0,08% | 0,08% | 0,013958319 |
| PWY-5031                    | L-histidine degradation V                                                              | 0,00% | 0,01% | 0,00% | 0,01% | 0,034958896 |
| ILEUDEG-PWY                 | L-isoleucine degradation I                                                             | 0,05% | 0,10% | 0,04% | 0,03% | 0,013938201 |
| PWY0-1317                   | L-lactaldehyde degradation (aerobic)                                                   | 0,03% | 0,01% | 0,03% | 0,01% | 0,02237191  |
| HOMOSER-METSYN-PWY          | L-methionine biosynthesis I                                                            | 0,11% | 0,17% | 0,05% | 0,05% | 0,046197192 |
| TRYPTOPHAN-DEGRADATION-1    | L-tryptophan degradation III (eukaryotic)                                              | 0,03% | 0,07% | 0,03% | 0,03% | 0,026952114 |
| MALTOSECAT-PWY              | maltose degradation                                                                    | 0,00% | 0,01% | 0,00% | 0,01% | 0,013317229 |
| PWY-3861                    | mannitol degradation II                                                                | 0,03% | 0,01% | 0,02% | 0,01% | 0,042562288 |
| PWY-5459                    | methylglyoxal degradation IV                                                           | 0,03% | 0,01% | 0,03% | 0,01% | 0,02237191  |
| PWY0-1533                   | methylphosphonate degradation I                                                        | 0,01% | 0,00% | 0,01% | 0,01% | 0,045745085 |
| PWY-6048                    | methylthiopropionate degradation I (cleavage)                                          | 0,02% | 0,06% | 0,02% | 0,02% | 0,006843048 |
| PWY0-1587                   | N <sup>6</sup> -L-threonylcarbamoyladenosine <sup>37</sup> -modified tRNA biosynthesis | 0,00% | 0,03% | 0,01% | 0,02% | 0,001742809 |
| PWY-5388                    | N-glucosylnicotinate metabolism                                                        | 0,06% | 0,03% | 0,03% | 0,02% | 0,023402195 |
| PWY-722                     | nicotinate degradation I                                                               | 0,02% | 0,06% | 0,02% | 0,03% | 0,018230795 |
| PWY-5033                    | nicotinate degradation II                                                              | 0,02% | 0,06% | 0,02% | 0,03% | 0,02398539  |
| PWY66-221                   | nicotine degradation V                                                                 | 0,02% | 0,06% | 0,02% | 0,03% | 0,02398539  |
| PWY0-1584                   | nitrate reduction X (dissimilatory, periplasmic)                                       | 0,24% | 0,36% | 0,05% | 0,10% | 0,023429169 |
| PWY-7576                    | nitrogen fixation II (flavodoxin)                                                      | 0,04% | 0,02% | 0,02% | 0,01% | 0,033955264 |
| PWY-6342                    | noradrenaline and adrenaline degradation                                               | 0,00% | 0,01% | 0,00% | 0,01% | 0,042839992 |
| PWY-7955                    | paerucumarin biosynthesis                                                              | 0,04% | 0,02% | 0,02% | 0,01% | 0,031625262 |
| PWY-7411                    | phosphatidate biosynthesis (yeast)                                                     | 0,00% | 0,01% | 0,00% | 0,01% | 0,021689047 |
| PANTO-PWY                   | phosphopantothenate biosynthesis I                                                     | 0,06% | 0,12% | 0,04% | 0,05% | 0,038283578 |
| PWY-7218                    | photosynthetic 3-hydroxybutanoate biosynthesis (engineered)                            | 0,64% | 0,52% | 0,05% | 0,10% | 0,027675846 |
| PWY-7170                    | phytochromobilin biosynthesis                                                          | 0,04% | 0,01% | 0,03% | 0,02% | 0,037179826 |
| PWY-7547                    | prodigiosin biosynthesis                                                               | 0,03% | 0,06% | 0,02% | 0,02% | 0,014924542 |
| PWY-7899                    | protein NEDDylation                                                                    | 0,09% | 0,05% | 0,02% | 0,02% | 0,005105832 |
| PWY-6970                    | pyruvate decarboxylation to acetyl CoA II                                              | 0,00% | 0,02% | 0,00% | 0,02% | 0,023973359 |
| PWY-5483                    | pyruvate fermentation to acetate III                                                   | 0,00% | 0,02% | 0,01% | 0,02% | 0,034218307 |
| PWY-5538                    | pyruvate fermentation to acetate VI                                                    | 0,00% | 0,01% | 0,00% | 0,01% | 0,044094686 |
| PWY-6416                    | quininate degradation II                                                               | 0,00% | 0,01% | 0,00% | 0,01% | 0,027982657 |
| PWY-5677                    | succinate fermentation to butanoate                                                    | 0,08% | 0,17% | 0,03% | 0,03% | 4,03626E-05 |
| P441-PWY                    | superpathway of <i>N</i>-acetylneuramate degradation                                   | 1,05% | 0,91% | 0,10% | 0,08% | 0,006184992 |
| PWY-6928                    | superpathway of cholesterol degradation I (cholesterol oxidase)                        | 0,04% | 0,07% | 0,03% | 0,03% | 0,03539693  |
| ALL-CHORISMATE-PWY          | superpathway of chorismate metabolism                                                  | 0,45% | 0,33% | 0,07% | 0,10% | 0,042567682 |
| PWY-4221                    | superpathway of coenzyme A biosynthesis II (plants)                                    | 0,02% | 0,06% | 0,02% | 0,03% | 0,02539759  |
| PWY-6049                    | superpathway of dimethylsulfoniopropionate degradation                                 | 0,05% | 0,11% | 0,05% | 0,06% | 0,045930588 |
| PWY-7156                    | superpathway of ergosterol biosynthesis II                                             | 0,04% | 0,02% | 0,02% | 0,01% | 0,031625262 |
| GLYCOLYSIS-E-D              | superpathway of glycolysis and the Entner-Doudoroff pathway                            | 0,81% | 0,65% | 0,19% | 0,09% | 0,027268894 |
| GLYCOLYSIS-TCA-GLYOX-BYPASS | superpathway of glycolysis, pyruvate dehydrogenase, TCA, and glyoxylate bypass         | 1,15% | 0,84% | 0,20% | 0,12% | 0,000969173 |

|                     |                                                                           |       |       |       |       |             |
|---------------------|---------------------------------------------------------------------------|-------|-------|-------|-------|-------------|
| TCA-GLYOX-BYPASS    | superpathway of glyoxylate bypass and TCA                                 | 0,32% | 0,22% | 0,07% | 0,06% | 0,006291403 |
| PWY-5920            | superpathway of heme biosynthesis from glycine                            | 0,04% | 0,02% | 0,03% | 0,02% | 0,034780555 |
| HEXITOLDEGSUPER-PWY | superpathway of hexitol degradation (bacteria)                            | 0,80% | 0,64% | 0,11% | 0,09% | 0,005897784 |
| PWY0-1325           | superpathway of L-asparagine biosynthesis                                 | 0,04% | 0,02% | 0,02% | 0,01% | 0,031625262 |
| METSYN-PWY          | superpathway of L-homoserine and L-methionine biosynthesis                | 0,18% | 0,25% | 0,06% | 0,06% | 0,044696332 |
| PWY-724             | superpathway of L-lysine, L-threonine and L-methionine biosynthesis II    | 0,03% | 0,05% | 0,02% | 0,02% | 0,023921105 |
| PWY-7933            | superpathway of polybrominated aromatic compound biosynthesis             | 0,02% | 0,06% | 0,02% | 0,03% | 0,02398539  |
| PWY-6937            | superpathway of testosterone and androsterone degradation                 | 0,03% | 0,06% | 0,02% | 0,03% | 0,031868088 |
| PWY-7809            | superpathway of tetracycline and oxytetracycline biosynthesis             | 0,00% | 0,01% | 0,00% | 0,01% | 0,007547292 |
| PWY-6894            | thiamine diphosphate biosynthesis I (E. coli)                             | 0,00% | 0,00% | 0,00% | 0,00% | 0,044321557 |
| PWY-6897            | thiamine diphosphate salvage II                                           | 0,07% | 0,03% | 0,05% | 0,02% | 0,027289894 |
| PWY-5180            | toluene degradation I (aerobic) (<I>via</I> <i>o</i>-cresol)              | 0,02% | 0,00% | 0,02% | 0,01% | 0,048819437 |
| PWY-81              | toluene degradation to benzoyl-CoA (anaerobic)                            | 0,03% | 0,06% | 0,03% | 0,03% | 0,043795919 |
| PWY-5184            | toluene degradation VI (anaerobic)                                        | 0,03% | 0,06% | 0,03% | 0,03% | 0,043795919 |
| PWY-6708            | ubiquinol-8 biosynthesis (prokaryotic)                                    | 0,04% | 0,01% | 0,03% | 0,01% | 0,009716716 |
| PWY-4861            | UDP-&alpha;-D-galacturonate biosynthesis I (from UDP-D-glucuronate)       | 0,00% | 0,00% | 0,00% | 0,01% | 0,046360677 |
| PWY-7334            | UDP-<i>N</i>-acetyl-&alpha;-D-quinovosamine biosynthesis                  | 0,04% | 0,02% | 0,03% | 0,02% | 0,022548914 |
| PWY-6454            | vancomycin resistance I                                                   | 0,00% | 0,01% | 0,00% | 0,01% | 0,034384015 |
| PWY-7213            | wogonin metabolism                                                        | 0,00% | 0,01% | 0,00% | 0,01% | 0,032066027 |
| PWY-7219            | adenosine ribonucleotides <i>de novo</i> biosynthesis                     | 0,03% | 0,06% | 0,03% | 0,02% | 0,050641655 |
| PWY-5910            | superpathway of geranylgeranyldiphosphate biosynthesis I (via mevalonate) | 0,14% | 0,10% | 0,06% | 0,03% | 0,050775449 |
| PWY-641             | proanthocyanidins biosynthesis from flavanols                             | 0,04% | 0,07% | 0,03% | 0,03% | 0,051738236 |
| PWY-6397            | mycolyl-arabinogalactan-peptidoglycan complex biosynthesis                | 0,03% | 0,07% | 0,03% | 0,04% | 0,051923742 |
| ENTBACSYN-PWY       | enterobactin biosynthesis                                                 | 0,03% | 0,01% | 0,03% | 0,02% | 0,052100339 |
| PWY-3661            | glycine betaine degradation I                                             | 0,05% | 0,10% | 0,04% | 0,04% | 0,052158252 |
| PWY-5096            | pyruvate fermentation to acetate and alanine                              | 0,01% | 0,05% | 0,01% | 0,04% | 0,053339274 |
| PWY-5436            | L-threonine degradation IV                                                | 0,12% | 0,17% | 0,05% | 0,04% | 0,053375    |
| PWY-7555            | &alpha;-cyclopiazonate biosynthesis                                       | 0,08% | 0,05% | 0,02% | 0,03% | 0,054847718 |
| PWY-5519            | D-arabinose degradation III                                               | 0,00% | 0,00% | 0,00% | 0,01% | 0,055134481 |
| PWY-6423            | hemoglobin degradation                                                    | 0,00% | 0,00% | 0,00% | 0,01% | 0,055356791 |
| UBISYN-PWY          | superpathway of ubiquinol-8 biosynthesis (prokaryotic)                    | 0,04% | 0,02% | 0,03% | 0,02% | 0,056250452 |
| PWY-7228            | superpathway of guanosine nucleotides <i>de novo</i> biosynthesis I       | 0,32% | 0,43% | 0,11% | 0,10% | 0,058332248 |
| PWY-2381            | 4-nitrobenzoate degradation                                               | 0,05% | 0,08% | 0,03% | 0,03% | 0,058903162 |
| PWY-7431            | aromatic biogenic amine degradation (bacteria)                            | 0,01% | 0,00% | 0,01% | 0,01% | 0,059033245 |
| PWY-6583            | pyruvate fermentation to butanol I                                        | 0,20% | 0,32% | 0,12% | 0,10% | 0,059859024 |
| PWY-7003            | glycerol degradation to butanol                                           | 0,20% | 0,32% | 0,12% | 0,10% | 0,059859024 |
| PWY-5165            | 4-toluenesulfonate degradation II                                         | 0,00% | 0,01% | 0,00% | 0,01% | 0,060506217 |
| PWY0-1296           | purine ribonucleosides degradation                                        | 0,00% | 0,01% | 0,00% | 0,01% | 0,060506217 |
| PWY-7179            | purine deoxyribonucleosides degradation I                                 | 0,00% | 0,01% | 0,00% | 0,01% | 0,060506217 |
| PWY-6318            | L-phenylalanine degradation IV (mammalian, via side chain)                | 0,00% | 0,01% | 0,00% | 0,01% | 0,060506217 |
| PWY-6313            | serotonin degradation                                                     | 0,00% | 0,01% | 0,00% | 0,01% | 0,060506217 |
| PWY66-389           | phytol degradation                                                        | 0,00% | 0,01% | 0,00% | 0,01% | 0,060506217 |
| PWY6666-2           | dopamine degradation                                                      | 0,00% | 0,01% | 0,00% | 0,01% | 0,060506217 |
| PWY-5104            | L-isoleucine biosynthesis IV                                              | 0,03% | 0,07% | 0,03% | 0,04% | 0,061311339 |

|                 |                                                                               |       |       |       |       |             |
|-----------------|-------------------------------------------------------------------------------|-------|-------|-------|-------|-------------|
| PWY-7787        | L-threitol degradation                                                        | 0,00% | 0,01% | 0,00% | 0,01% | 0,061423034 |
| PWY-3661-1      | glycine betaine degradation II (mammalian)                                    | 0,03% | 0,06% | 0,03% | 0,02% | 0,062220373 |
| PWY-6446        | benzoate biosynthesis III (CoA-dependent, non- $\beta$ -oxidative)            | 0,20% | 0,32% | 0,12% | 0,10% | 0,06297255  |
| PWY-7482        | cyclooctatin biosynthesis                                                     | 0,12% | 0,08% | 0,05% | 0,03% | 0,065808528 |
| PWY-7127        | CDP-D-mannitol biosynthesis                                                   | 0,00% | 0,01% | 0,00% | 0,01% | 0,065903265 |
| PWY-5257        | superpathway of pentose and pentitol degradation                              | 0,46% | 0,36% | 0,15% | 0,07% | 0,06632436  |
| PWY-7799        | Arg/N-end rule pathway (eukaryotic)                                           | 0,00% | 0,01% | 0,00% | 0,01% | 0,066725078 |
| PWY-7800        | Ac/N-end rule pathway                                                         | 0,00% | 0,01% | 0,00% | 0,01% | 0,066725078 |
| PWY-6691        | plaunotol biosynthesis                                                        | 0,01% | 0,04% | 0,02% | 0,03% | 0,068072458 |
| PWY-7859        | jasmonoyl-L-isoleucine inactivation                                           | 0,00% | 0,00% | 0,00% | 0,01% | 0,06949624  |
| CITRULBIO-PWY   | L-citrulline biosynthesis                                                     | 0,11% | 0,17% | 0,04% | 0,06% | 0,070863493 |
| PWY-5189        | tetrapyrrole biosynthesis II (from glycine)                                   | 0,03% | 0,01% | 0,03% | 0,01% | 0,070878996 |
| PWY-5248        | methanogenesis from dimethylamine                                             | 0,00% | 0,02% | 0,01% | 0,02% | 0,072108949 |
| PWY-1622        | formaldehyde assimilation I (serine pathway)                                  | 0,38% | 0,30% | 0,11% | 0,06% | 0,073313628 |
| PWY-561         | superpathway of glyoxylate cycle and fatty acid degradation                   | 0,02% | 0,04% | 0,02% | 0,03% | 0,073552383 |
| PWY-5           | canavanine biosynthesis                                                       | 0,14% | 0,10% | 0,06% | 0,03% | 0,07390297  |
| PWY-6717        | (1,4)- $\beta$ -D-xylan degradation                                           | 0,01% | 0,02% | 0,01% | 0,02% | 0,074382568 |
| PWY-8060        | 2-deoxy-D-ribose degradation I                                                | 0,01% | 0,03% | 0,01% | 0,02% | 0,076353252 |
| RHAMCAT-PWY     | L-rhamnose degradation I                                                      | 0,11% | 0,08% | 0,03% | 0,04% | 0,076574409 |
| PWY-7866        | coenzyme B/coenzyme M regeneration III (coenzyme F <sub>420</sub> -dependent) | 0,00% | 0,00% | 0,00% | 0,01% | 0,078306699 |
| PWY-7807        | glyphosate degradation III                                                    | 0,02% | 0,04% | 0,02% | 0,03% | 0,079479263 |
| PWY-5484        | glycolysis II (from fructose 6-phosphate)                                     | 0,71% | 0,55% | 0,15% | 0,06% | 0,079786797 |
| PWY-6914        | sophoraflavanone G biosynthesis                                               | 0,03% | 0,06% | 0,03% | 0,03% | 0,080429196 |
| COA-PWY         | coenzyme A biosynthesis I (prokaryotic)                                       | 0,05% | 0,03% | 0,03% | 0,02% | 0,080496089 |
| PWY-5361        | (5 <i>Z</i> )-icosenoate biosynthesis                                         | 0,00% | 0,01% | 0,00% | 0,01% | 0,081127368 |
| FUC-RHAMCAT-PWY | superpathway of fucose and rhamnose degradation                               | 0,34% | 0,22% | 0,17% | 0,09% | 0,081966883 |
| PWY-7588        | ursodeoxycholate biosynthesis (bacteria)                                      | 0,00% | 0,00% | 0,00% | 0,00% | 0,082317054 |
| PWY-7793        | dimethyl sulfide biosynthesis from methionine                                 | 0,00% | 0,00% | 0,00% | 0,00% | 0,082317054 |
| PWY-7110        | superpathway of megalomicin A biosynthesis                                    | 0,00% | 0,00% | 0,00% | 0,00% | 0,082317054 |
| GLYSYN-PWY      | glycine biosynthesis I                                                        | 0,10% | 0,06% | 0,06% | 0,04% | 0,083078559 |
| PWY-7893        | protein Pupylation and dePupylation                                           | 0,00% | 0,01% | 0,00% | 0,01% | 0,083151278 |
| PWY-7333        | UDP-N-acetyl- $\alpha$ -D-fucosamine biosynthesis                             | 0,04% | 0,02% | 0,03% | 0,02% | 0,083201213 |
| PWY-6789        | (1,3)- $\beta$ -D-xylan degradation                                           | 0,01% | 0,02% | 0,01% | 0,02% | 0,083886947 |
| PWY-7378        | aminopropanol phosphate biosynthesis II                                       | 0,03% | 0,01% | 0,02% | 0,01% | 0,084491957 |
| PWY-6965        | methylamine degradation II                                                    | 0,01% | 0,02% | 0,01% | 0,02% | 0,085261444 |
| PWY-6962        | superpathway of trimethylamine degradation                                    | 0,01% | 0,02% | 0,01% | 0,02% | 0,085261444 |
| PWY-6407        | yersiniabactin biosynthesis                                                   | 0,09% | 0,06% | 0,05% | 0,03% | 0,085818124 |
| PWY0-1466       | trehalose degradation VI (periplasmic)                                        | 0,05% | 0,02% | 0,03% | 0,03% | 0,086094086 |
| CARNMET-PWY     | L-carnitine degradation I                                                     | 0,04% | 0,07% | 0,04% | 0,02% | 0,086238558 |
| PWY-7053        | docosaehaenoate biosynthesis I (lower eukaryotes)                             | 0,00% | 0,00% | 0,00% | 0,01% | 0,086810002 |
| PWY-7181        | pyrimidine deoxyribonucleosides degradation                                   | 0,00% | 0,00% | 0,00% | 0,01% | 0,08693758  |
| PWY-7575        | superpathway of candidin biosynthesis                                         | 0,00% | 0,00% | 0,00% | 0,01% | 0,08693758  |
| PWY-7838        | globo-series glycosphingolipids biosynthesis                                  | 0,07% | 0,11% | 0,03% | 0,04% | 0,088653057 |
| PWY-8062        | sulfoacetaldehyde degradation IV                                              | 0,05% | 0,02% | 0,04% | 0,02% | 0,089742601 |
| BENZCOA-PWY     | anaerobic aromatic compound degradation ( <i>Thauera aromatica</i> )          | 0,04% | 0,06% | 0,03% | 0,02% | 0,090236621 |
| PWY-7858        | (5 <i>Z</i> )-dodecenoate biosynthesis II                                     | 0,03% | 0,07% | 0,02% | 0,04% | 0,091156802 |

|                                    |                                                                                                           |       |       |       |       |             |
|------------------------------------|-----------------------------------------------------------------------------------------------------------|-------|-------|-------|-------|-------------|
| PWY-7518                           | atromentin biosynthesis                                                                                   | 0,00% | 0,00% | 0,00% | 0,00% | 0,092543244 |
| LEU-DEG2-PWY                       | L-leucine degradation I                                                                                   | 0,05% | 0,08% | 0,03% | 0,03% | 0,093153393 |
| PWY-841                            | superpathway of purine nucleotides <i>&lt;i&gt;de novo&lt;/i&gt;</i> biosynthesis I                       | 0,38% | 0,53% | 0,14% | 0,16% | 0,093197601 |
| PWY-7918                           | protein <i>&lt;i&gt;N&lt;/i&gt;</i> -glycosylation processing phase (yeast)                               | 0,01% | 0,02% | 0,01% | 0,02% | 0,093735988 |
| TRPIAACAT-PWY                      | indole-3-acetate biosynthesis VI (bacteria)                                                               | 0,00% | 0,00% | 0,00% | 0,01% | 0,093894068 |
| PWY0-42                            | 2-methylcitrate cycle I                                                                                   | 0,09% | 0,03% | 0,07% | 0,02% | 0,094027792 |
| PWY-5857                           | ubiquinol-10 biosynthesis (prokaryotic)                                                                   | 0,02% | 0,01% | 0,01% | 0,01% | 0,094758385 |
| FOLSYN-PWY                         | superpathway of tetrahydrofolate biosynthesis and salvage                                                 | 0,18% | 0,12% | 0,08% | 0,05% | 0,097420325 |
| PWY0-1391                          | <i>&lt;i&gt;S&lt;/i&gt;</i> -methyl-5'-thioadenosine degradation IV                                       | 0,00% | 0,00% | 0,00% | 0,01% | 0,097848114 |
| PWY-6876                           | isopropanol biosynthesis (engineered)                                                                     | 0,00% | 0,02% | 0,01% | 0,02% | 0,097983907 |
| PWY-4984                           | urea cycle                                                                                                | 0,17% | 0,22% | 0,06% | 0,05% | 0,098296327 |
| PWY-5600                           | pyruvate fermentation to acetate VII                                                                      | 0,00% | 0,00% | 0,00% | 0,01% | 0,098896821 |
| PWY-7984                           | acinetobactin biosynthesis                                                                                | 0,03% | 0,00% | 0,03% | 0,00% | 0,100618623 |
| PWY-6608                           | guanosine nucleotides degradation III                                                                     | 0,05% | 0,10% | 0,03% | 0,06% | 0,101789243 |
| PWY-6604                           | superpathway of <i>&lt;i&gt;Clostridium acetobutylicum&lt;/i&gt;</i> acidogenic and solventogenic ferment | 0,48% | 0,58% | 0,10% | 0,11% | 0,101820329 |
| 3-HYDROXYPHENYLACETATE-DEGRADATION | 4-hydroxyphenylacetate degradation                                                                        | 0,01% | 0,00% | 0,01% | 0,00% | 0,105160213 |
| PWY66-425                          | L-lysine degradation II (L-pipecolate pathway)                                                            | 0,00% | 0,00% | 0,00% | 0,01% | 0,106640824 |
| PWY-8035                           | streptovaricin biosynthesis                                                                               | 0,00% | 0,00% | 0,00% | 0,01% | 0,107601012 |
| PWY-7124                           | ethene biosynthesis V (engineered)                                                                        | 0,46% | 0,39% | 0,09% | 0,07% | 0,11000368  |
| PWY-7254                           | TCA cycle VII (acetate-producers)                                                                         | 0,02% | 0,00% | 0,02% | 0,01% | 0,110067838 |
| PWY-6687                           | mannosylglucosylglycerate biosynthesis II                                                                 | 0,02% | 0,01% | 0,01% | 0,01% | 0,110113838 |
| PWY-7229                           | superpathway of adenosine nucleotides <i>&lt;i&gt;de novo&lt;/i&gt;</i> biosynthesis I                    | 0,23% | 0,30% | 0,10% | 0,06% | 0,110606129 |
| PWY-5004                           | superpathway of L-citrulline metabolism                                                                   | 0,21% | 0,26% | 0,06% | 0,06% | 0,11130701  |
| ECASYN-PWY                         | enterobacterial common antigen biosynthesis                                                               | 0,19% | 0,14% | 0,07% | 0,06% | 0,111856047 |
| P163-PWY                           | L-lysine fermentation to acetate and butanoate                                                            | 0,15% | 0,20% | 0,06% | 0,05% | 0,113667631 |
| SERDEG-PWY                         | L-serine degradation                                                                                      | 0,04% | 0,06% | 0,03% | 0,03% | 0,114567994 |
| PWY66-367                          | ketogenesis                                                                                               | 0,00% | 0,00% | 0,00% | 0,01% | 0,11698098  |
| P125-PWY                           | superpathway of ( <i>&lt;i&gt;R&lt;/i&gt;</i> )-butanediol biosynthesis                                   | 0,13% | 0,18% | 0,05% | 0,05% | 0,117186266 |
| HSERMETANA-PWY                     | L-methionine biosynthesis III                                                                             | 0,21% | 0,27% | 0,07% | 0,07% | 0,118349515 |
| PWY-6406                           | salicylate biosynthesis I                                                                                 | 0,03% | 0,06% | 0,04% | 0,03% | 0,119892191 |
| PWY-6588                           | pyruvate fermentation to acetone                                                                          | 0,00% | 0,02% | 0,01% | 0,02% | 0,120108942 |
| PWY-8131                           | 5'-deoxyadenosine degradation II                                                                          | 0,01% | 0,02% | 0,01% | 0,02% | 0,120377327 |
| PWY-7801                           | N-end rule pathway I (prokaryotic)                                                                        | 0,01% | 0,03% | 0,01% | 0,03% | 0,120606136 |
| PWY-7822                           | chitin degradation III (Serratia)                                                                         | 0,01% | 0,03% | 0,01% | 0,02% | 0,121553935 |
| PWY-5397                           | crocin biosynthesis                                                                                       | 0,01% | 0,03% | 0,01% | 0,02% | 0,121553935 |
| PWY-7760                           | bacteriochlorophyll <i>&lt;i&gt;e&lt;/i&gt;</i> biosynthesis                                              | 0,01% | 0,03% | 0,01% | 0,02% | 0,121553935 |
| PWY18C3-23                         | guaiaicol biosynthesis                                                                                    | 0,00% | 0,01% | 0,01% | 0,02% | 0,122168471 |
| PWY-6553                           | caffeine degradation II                                                                                   | 0,01% | 0,02% | 0,01% | 0,02% | 0,123034031 |
| PWY-7028                           | UDP- <i>&lt;i&gt;N,N'&lt;/i&gt;</i> -diacetylbaicillosamine biosynthesis                                  | 0,02% | 0,05% | 0,02% | 0,04% | 0,123377755 |
| PWY-7485                           | tetracenomycin C biosynthesis                                                                             | 0,00% | 0,00% | 0,00% | 0,01% | 0,123865681 |
| PWY-701                            | L-methionine degradation II                                                                               | 0,00% | 0,00% | 0,00% | 0,01% | 0,124141488 |
| PWY66-426                          | hydrogen sulfide biosynthesis II (mammalian)                                                              | 0,00% | 0,00% | 0,00% | 0,01% | 0,125241446 |
| PWY-5898                           | superpathway of menaquinol-12 biosynthesis                                                                | 0,00% | 0,01% | 0,01% | 0,01% | 0,126526526 |
| PWY-6815                           | porphyran degradation                                                                                     | 0,01% | 0,03% | 0,02% | 0,02% | 0,127709497 |
| PWY-5423                           | oleoresin monoterpene volatiles biosynthesis                                                              | 0,26% | 0,21% | 0,05% | 0,06% | 0,127793708 |
| PWY-6330                           | acetaldehyde biosynthesis II                                                                              | 0,00% | 0,02% | 0,01% | 0,02% | 0,128337972 |



|                               |                                                                           |       |       |       |       |             |
|-------------------------------|---------------------------------------------------------------------------|-------|-------|-------|-------|-------------|
| PWY-6855                      | chitin degradation I (archaea)                                            | 0,06% | 0,03% | 0,05% | 0,03% | 0,130130021 |
| PWY-6353                      | purine nucleotides degradation II (aerobic)                               | 0,16% | 0,21% | 0,05% | 0,07% | 0,134979989 |
| ASPSYNII-PWY                  | cyanide detoxification I                                                  | 0,00% | 0,01% | 0,00% | 0,01% | 0,137883083 |
| PWY-5674                      | nitrate reduction IV (dissimilatory)                                      | 0,00% | 0,00% | 0,00% | 0,01% | 0,138895898 |
| PWY-5197                      | lactate biosynthesis (archaea)                                            | 0,07% | 0,05% | 0,02% | 0,03% | 0,140655236 |
| PWY-7474                      | avenacin A-2 biosynthesis                                                 | 0,05% | 0,03% | 0,04% | 0,02% | 0,140906314 |
| PWY-5301                      | ajmaline and sarpagine biosynthesis                                       | 0,00% | 0,01% | 0,01% | 0,01% | 0,141392895 |
| PWY-6124                      | inosine-5'-phosphate biosynthesis II                                      | 0,12% | 0,17% | 0,04% | 0,08% | 0,142222205 |
| PWY0-1182                     | trehalose degradation II (cytosolic)                                      | 0,01% | 0,02% | 0,01% | 0,01% | 0,142567908 |
| PWY-6762                      | salicylate glucosides biosynthesis IV                                     | 0,01% | 0,02% | 0,02% | 0,02% | 0,144963742 |
| PWY-6766                      | salicin biosynthesis                                                      | 0,01% | 0,02% | 0,02% | 0,02% | 0,144963742 |
| ASPARTATE-DEG1-PWY            | L-aspartate degradation I                                                 | 0,01% | 0,02% | 0,02% | 0,02% | 0,144963742 |
| PWY-8127                      | chlorophyll $\text{b}$ biosynthesis                                       | 0,00% | 0,01% | 0,01% | 0,01% | 0,146264082 |
| PYRIDOXYN-PWY                 | pyridoxal 5'-phosphate biosynthesis I                                     | 0,23% | 0,18% | 0,08% | 0,05% | 0,146981915 |
| PWY0-1568                     | NADH to cytochrome $\text{c}$ oxidase electron transfer II                | 0,04% | 0,02% | 0,03% | 0,02% | 0,147104283 |
| RUMP-PWY                      | formaldehyde oxidation I                                                  | 0,01% | 0,03% | 0,02% | 0,02% | 0,148744115 |
| PWY-5499                      | vitamin B <sub>6</sub> degradation                                        | 0,03% | 0,06% | 0,03% | 0,04% | 0,14948583  |
| PWY-7013                      | ( $\text{S}$ )-propane-1,2-diol degradation                               | 0,04% | 0,02% | 0,03% | 0,02% | 0,149646734 |
| PWY-6160                      | 3-dehydroquinate biosynthesis II (archaea)                                | 0,03% | 0,02% | 0,02% | 0,01% | 0,151341273 |
| PWY-6332                      | coumestrol biosynthesis                                                   | 0,01% | 0,05% | 0,01% | 0,05% | 0,152009091 |
| METHYLGALLATE-DEGRADATION-PWY | methylgallate degradation                                                 | 0,13% | 0,10% | 0,05% | 0,04% | 0,152078996 |
| PWY-6338                      | superpathway of vanillin and vanillate degradation                        | 0,13% | 0,10% | 0,05% | 0,04% | 0,152078996 |
| PWY-6339                      | syringate degradation                                                     | 0,13% | 0,10% | 0,05% | 0,04% | 0,152078996 |
| PYRUVDEHYD-PWY                | pyruvate decarboxylation to acetyl CoA I                                  | 0,01% | 0,02% | 0,01% | 0,01% | 0,152744894 |
| ENTNER-DOUDOROFF-PWY          | Entner-Doudoroff shunt                                                    | 0,00% | 0,01% | 0,00% | 0,01% | 0,153508825 |
| CENTFERM-PWY                  | pyruvate fermentation to butanoate                                        | 0,18% | 0,25% | 0,09% | 0,09% | 0,155530358 |
| PWY0-1299                     | arginine dependent acid resistance                                        | 0,01% | 0,00% | 0,01% | 0,01% | 0,155562534 |
| PWY-7946                      | sarcinaxanthin diglucoside biosynthesis                                   | 0,05% | 0,02% | 0,04% | 0,02% | 0,155823788 |
| PWY0-781                      | aspartate superpathway                                                    | 0,13% | 0,17% | 0,07% | 0,05% | 0,156316616 |
| PWY-7934                      | polybrominated dihydroxylated diphenyl ethers biosynthesis                | 0,31% | 0,25% | 0,07% | 0,08% | 0,157284943 |
| PWY0-1597                     | prenylated FMNH <sub>2</sub> biosynthesis                                 | 0,03% | 0,01% | 0,03% | 0,01% | 0,15832454  |
| PWY0-845                      | superpathway of pyridoxal 5'-phosphate biosynthesis and salvage           | 0,25% | 0,18% | 0,09% | 0,05% | 0,158515613 |
| PWY-6697                      | oxalate degradation IV                                                    | 0,41% | 0,32% | 0,12% | 0,05% | 0,158594108 |
| PHOSPHONOTASE-PWY             | 2-aminoethylphosphonate degradation I                                     | 0,01% | 0,03% | 0,01% | 0,02% | 0,159197421 |
| PWY0-1415                     | superpathway of heme $\text{b}$ biosynthesis from uroporphyrinogen-III    | 0,03% | 0,01% | 0,03% | 0,01% | 0,160472289 |
| PWY-6590                      | superpathway of <i>Clostridium acetobutylicum</i> acidogenic fermentation | 0,37% | 0,45% | 0,09% | 0,10% | 0,161515457 |
| PWY-5531                      | 3,8-divinyl-chlorophyllide $\text{a}$ biosynthesis II (anaerobic)         | 0,03% | 0,02% | 0,03% | 0,02% | 0,161876959 |
| PWY-6780                      | hydrogen production VI                                                    | 0,01% | 0,00% | 0,01% | 0,01% | 0,162678898 |
| PWY-7224                      | purine deoxyribonucleosides salvage                                       | 0,04% | 0,08% | 0,04% | 0,04% | 0,163103859 |
| PWY-7602                      | icosapentaenoate biosynthesis V (8-desaturase, lower eukaryotes)          | 0,03% | 0,01% | 0,03% | 0,01% | 0,163221351 |
| GLYCOCAT-PWY                  | glycogen degradation I                                                    | 0,10% | 0,06% | 0,07% | 0,04% | 0,165304943 |
| PWY-6995                      | 5-hydroxymethylfurfural degradation                                       | 0,00% | 0,00% | 0,00% | 0,00% | 0,16612406  |
| PWY-5303                      | thiosulfate oxidation II (via tetrathionate)                              | 0,00% | 0,00% | 0,00% | 0,01% | 0,166346945 |
| PWY-7868                      | coenzyme B/coenzyme M regeneration V (formate-dependent)                  | 0,00% | 0,00% | 0,00% | 0,00% | 0,166911761 |
| GLUDEG-II-PWY                 | L-glutamate degradation VII (to butanoate)                                | 0,28% | 0,36% | 0,11% | 0,10% | 0,167013737 |
| PWY-7398                      | coumarins biosynthesis (engineered)                                       | 0,14% | 0,19% | 0,04% | 0,07% | 0,167454878 |

|                    |                                                                        |       |       |       |       |             |
|--------------------|------------------------------------------------------------------------|-------|-------|-------|-------|-------------|
| PWY-6748           | nitrate reduction VII (denitrification)                                | 0,00% | 0,00% | 0,00% | 0,00% | 0,167459906 |
| PWY-8033           | aureothin biosynthesis                                                 | 0,00% | 0,00% | 0,00% | 0,00% | 0,167459906 |
| PWY-3061           | menthol biosynthesis                                                   | 0,01% | 0,01% | 0,01% | 0,01% | 0,167568158 |
| PWY-7419           | FR-900098 and FR-33289 antibiotics biosynthesis                        | 0,00% | 0,00% | 0,00% | 0,01% | 0,168003249 |
| PWY-7216           | (R)- and (S)-3-hydroxybutanoate biosynthesis (engineered)              | 0,00% | 0,00% | 0,00% | 0,01% | 0,168566561 |
| PWY-7102           | bisabolene biosynthesis (engineered)                                   | 0,00% | 0,00% | 0,00% | 0,01% | 0,168566561 |
| CO2FORM-PWY        | methanogenesis from methanol                                           | 0,00% | 0,00% | 0,00% | 0,01% | 0,168578782 |
| PWY-5864           | superpathway of plastoquinol biosynthesis                              | 0,10% | 0,05% | 0,07% | 0,01% | 0,168887286 |
| PWY-8133           | succinoglycan biosynthesis                                             | 0,00% | 0,00% | 0,00% | 0,00% | 0,169613738 |
| PWY-8111           | carbaryl degradation                                                   | 0,00% | 0,00% | 0,00% | 0,01% | 0,170377122 |
| PWY-5427           | naphthalene degradation (aerobic)                                      | 0,00% | 0,00% | 0,00% | 0,01% | 0,170377122 |
| PWY-6956           | naphthalene degradation to acetyl-CoA                                  | 0,00% | 0,00% | 0,00% | 0,01% | 0,170377122 |
| PWY-6822           | &iota;-carrageenan degradation                                         | 0,00% | 0,00% | 0,00% | 0,00% | 0,173258482 |
| PWY-6363           | D-<i>myo</i>-inositol (1,4,5)-trisphosphate degradation                | 0,00% | 0,00% | 0,00% | 0,00% | 0,173258482 |
| PWY-6358           | superpathway of D-<i>myo</i>-inositol (1,4,5)-trisphosphate metabolism | 0,00% | 0,00% | 0,00% | 0,00% | 0,173258482 |
| PWY-6619           | adenine and adenosine salvage VI                                       | 0,00% | 0,01% | 0,00% | 0,01% | 0,173258482 |
| PWY-7552           | heme <i>b</i> biosynthesis III (from siroheme)                         | 0,00% | 0,01% | 0,00% | 0,01% | 0,173258482 |
| PWY-7977           | L-methionine biosynthesis IV                                           | 0,07% | 0,10% | 0,05% | 0,04% | 0,173971531 |
| PWY0-541           | cyclopropane fatty acid (CFA) biosynthesis                             | 0,00% | 0,00% | 0,00% | 0,00% | 0,175638252 |
| PWY-6117           | spermine and spermidine degradation I                                  | 0,02% | 0,04% | 0,03% | 0,02% | 0,175970354 |
| PWY-7671           | saframycin A biosynthesis                                              | 0,03% | 0,01% | 0,03% | 0,01% | 0,175985081 |
| PWY-5679           | clavulanate biosynthesis                                               | 0,00% | 0,00% | 0,00% | 0,00% | 0,176079044 |
| PWY-5047           | gibberellin biosynthesis IV (<i>Gibberella fujikuroi</i>)              | 0,05% | 0,03% | 0,04% | 0,03% | 0,176372253 |
| PWY-7480           | 2,3-dihydroxybenzoate degradation                                      | 0,05% | 0,03% | 0,04% | 0,03% | 0,177023987 |
| COBALSYN-PWY       | superpathway of adenosylcobalamin salvage from cobinamide I            | 0,09% | 0,12% | 0,05% | 0,04% | 0,177069838 |
| KDOSYN-PWY         | Kdo transfer to lipid IV<sub>A</sub> I (E. coli)                       | 0,02% | 0,00% | 0,03% | 0,00% | 0,177378021 |
| PWY-6467           | Kdo transfer to lipid IV<sub>A</sub> III (Chlamydia)                   | 0,02% | 0,00% | 0,03% | 0,00% | 0,177378021 |
| PWY-7161           | polymethylated quercetin biosynthesis                                  | 0,00% | 0,00% | 0,00% | 0,00% | 0,177396182 |
| PWY-7492           | paspaline biosynthesis                                                 | 0,02% | 0,01% | 0,03% | 0,01% | 0,177527396 |
| PWY-5266           | <i>p</i>-cymene degradation                                            | 0,00% | 0,00% | 0,00% | 0,00% | 0,179040545 |
| P201-PWY           | nitroglycerin degradation                                              | 0,00% | 0,00% | 0,00% | 0,01% | 0,179040545 |
| PWY66-375          | leukotriene biosynthesis                                               | 0,01% | 0,00% | 0,01% | 0,01% | 0,179580958 |
| PWY-6223           | gentisate degradation I                                                | 0,01% | 0,00% | 0,01% | 0,00% | 0,179815419 |
| PLPSAL-PWY         | pyridoxal 5'-phosphate salvage I                                       | 0,03% | 0,01% | 0,03% | 0,01% | 0,17998775  |
| PWY-6895           | superpathway of thiamine diphosphate biosynthesis II                   | 0,00% | 0,00% | 0,00% | 0,01% | 0,180169711 |
| PWY-7019           | butirosin biosynthesis                                                 | 0,00% | 0,00% | 0,00% | 0,01% | 0,180169711 |
| OCTOPINEDEG-PWY    | octopine degradation                                                   | 0,00% | 0,00% | 0,00% | 0,01% | 0,180169711 |
| LYSINE-DEG1-PWY    | L-lysine degradation XI (mammalian)                                    | 0,00% | 0,00% | 0,00% | 0,01% | 0,180169711 |
| PWY-6309           | L-tryptophan degradation XI (mammalian, via kynurenine)                | 0,00% | 0,00% | 0,00% | 0,01% | 0,180169711 |
| 2OXBUTYRATECAT-PWY | 2-oxobutanoate degradation II                                          | 0,00% | 0,00% | 0,00% | 0,00% | 0,180342916 |
| ALLANTOINDEG-PWY   | superpathway of allantoin degradation in yeast                         | 0,00% | 0,00% | 0,00% | 0,00% | 0,180342916 |
| PWY0-1280          | ethylene glycol degradation                                            | 0,09% | 0,06% | 0,05% | 0,04% | 0,18083014  |
| PWY-5793           | maysin biosynthesis                                                    | 0,03% | 0,01% | 0,03% | 0,01% | 0,181409756 |
| PWY-7351           | pyruvate fermentation to opines                                        | 0,00% | 0,00% | 0,00% | 0,00% | 0,181530477 |
| PWY-922            | mevalonate pathway I (eukaryotes and bacteria)                         | 0,02% | 0,04% | 0,03% | 0,03% | 0,182078681 |
| PWY-8028           | cycloartenol biosynthesis                                              | 0,02% | 0,04% | 0,01% | 0,03% | 0,183324742 |

|                    |                                                                      |       |       |       |       |             |
|--------------------|----------------------------------------------------------------------|-------|-------|-------|-------|-------------|
| PWY-7352           | daunorubicin biosynthesis                                            | 0,00% | 0,00% | 0,00% | 0,00% | 0,184020025 |
| GLUTDEG-PWY        | L-glutamate degradation II                                           | 0,05% | 0,08% | 0,04% | 0,04% | 0,184743107 |
| PWY-7404           | ceramide phosphoethanolamine biosynthesis                            | 0,04% | 0,06% | 0,03% | 0,02% | 0,185250921 |
| PWY-7628           | 2,4-dinitroanisole degradation                                       | 0,04% | 0,02% | 0,04% | 0,02% | 0,186615409 |
| PWY-6562           | norspermidine biosynthesis                                           | 0,08% | 0,10% | 0,05% | 0,04% | 0,186863322 |
| PWY-6559           | spermidine biosynthesis II                                           | 0,08% | 0,10% | 0,05% | 0,04% | 0,186863322 |
| PWY-6565           | superpathway of polyamine biosynthesis III                           | 0,08% | 0,10% | 0,05% | 0,04% | 0,186863322 |
| PWY-6277           | superpathway of 5-aminoimidazole ribonucleotide biosynthesis         | 0,21% | 0,17% | 0,03% | 0,06% | 0,187084378 |
| P542-PWY           | choline-<i>O</i>-sulfate degradation                                 | 0,30% | 0,35% | 0,02% | 0,10% | 0,187329141 |
| PWY-7287           | novobiocin biosynthesis                                              | 0,02% | 0,00% | 0,03% | 0,02% | 0,187799512 |
| PWY-7036           | very long chain fatty acid biosynthesis II                           | 0,00% | 0,01% | 0,01% | 0,01% | 0,188325027 |
| PWY-6720           | toyocamycin biosynthesis                                             | 0,00% | 0,01% | 0,01% | 0,01% | 0,188460517 |
| KDO-NAGLIPASYN-PWY | superpathway of (Kdo)<SUB>2</SUB>-lipid A biosynthesis               | 0,15% | 0,10% | 0,10% | 0,05% | 0,18949215  |
| FERMENTATION-PWY   | mixed acid fermentation                                              | 0,65% | 0,58% | 0,12% | 0,09% | 0,189729803 |
| PWY-5494           | pyruvate fermentation to propanoate II (acrylate pathway)            | 0,15% | 0,20% | 0,06% | 0,06% | 0,191569272 |
| PROPFERM-PWY       | L-alanine fermentation to propanoate and acetate                     | 0,15% | 0,20% | 0,06% | 0,06% | 0,191569272 |
| PWY-7094           | fatty acid salvage                                                   | 0,05% | 0,08% | 0,05% | 0,03% | 0,193140722 |
| PWY-7253           | apigeninidin 5-<i>O</i>-glucoside biosynthesis                       | 0,49% | 0,43% | 0,10% | 0,09% | 0,194132689 |
| PWY-6749           | CMP-legionamate biosynthesis I                                       | 0,05% | 0,01% | 0,06% | 0,01% | 0,194346217 |
| PROUT-PWY          | L-proline degradation                                                | 0,02% | 0,00% | 0,02% | 0,01% | 0,194725093 |
| PWY-1801           | formaldehyde oxidation II (glutathione-dependent)                    | 0,00% | 0,00% | 0,01% | 0,00% | 0,196013381 |
| PWY-7687           | stipitate biosynthesis                                               | 0,01% | 0,02% | 0,02% | 0,02% | 0,198035634 |
| GLUCONEO-PWY       | gluconeogenesis I                                                    | 0,76% | 0,56% | 0,28% | 0,08% | 0,198987429 |
| PWY-7761           | NAD salvage pathway II (PNC IV cycle)                                | 0,01% | 0,03% | 0,02% | 0,02% | 0,199452952 |
| PWY-7185           | UTP and CTP dephosphorylation I                                      | 0,00% | 0,00% | 0,01% | 0,00% | 0,200441451 |
| PWY-8134           | bile acid 7&beta;-dehydroxylation                                    | 0,00% | 0,00% | 0,01% | 0,00% | 0,200441451 |
| CYSTEINE-DEG-PWY   | L-cysteine degradation I                                             | 0,00% | 0,00% | 0,01% | 0,00% | 0,200441451 |
| PWY-6350           | archaetidylinositol biosynthesis                                     | 0,00% | 0,00% | 0,01% | 0,00% | 0,200441451 |
| PWY-7490           | patulin biosynthesis                                                 | 0,00% | 0,00% | 0,01% | 0,00% | 0,200441451 |
| PWY0-1507          | biotin biosynthesis from 8-amino-7-oxononanoate I                    | 0,05% | 0,07% | 0,03% | 0,03% | 0,201119337 |
| PWY0-1261          | anhydromuropeptides recycling I                                      | 0,18% | 0,21% | 0,04% | 0,06% | 0,20119525  |
| PWY0-1600          | periplasmic disulfide bond reduction                                 | 0,01% | 0,00% | 0,01% | 0,01% | 0,201277645 |
| PWY-7199           | pyrimidine deoxyribonucleosides salvage                              | 0,07% | 0,10% | 0,05% | 0,03% | 0,20161554  |
| PWY-7128           | nicotine degradation III (VPP pathway)                               | 0,06% | 0,09% | 0,05% | 0,05% | 0,202767288 |
| PWY-7523           | L-arginine degradation XII                                           | 0,04% | 0,07% | 0,03% | 0,04% | 0,202973975 |
| PWY-6125           | superpathway of guanosine nucleotides <i>de novo</i> biosynthesis II | 0,30% | 0,37% | 0,13% | 0,09% | 0,203824504 |
| PWY0-1329          | succinate to cytochrome <i>bo</i> oxidase electron transfer          | 0,14% | 0,11% | 0,06% | 0,04% | 0,20403998  |
| PWY-7541           | 1,2-propanediol biosynthesis from lactate (engineered)               | 0,06% | 0,04% | 0,02% | 0,04% | 0,204789652 |
| PWY-6510           | methanol oxidation to formaldehyde II                                | 0,03% | 0,02% | 0,02% | 0,01% | 0,205945297 |
| PWY-481            | ethylbenzene degradation (anaerobic)                                 | 0,00% | 0,00% | 0,01% | 0,00% | 0,206619635 |
| PWY-5030           | L-histidine degradation III                                          | 0,05% | 0,03% | 0,03% | 0,02% | 0,207439068 |
| PWY-5663           | <i>erythro</i>-tetrahydrobiopterin biosynthesis I                    | 0,01% | 0,03% | 0,02% | 0,02% | 0,20771295  |
| PWY-6579           | superpathway of guanine and guanosine salvage                        | 0,04% | 0,07% | 0,03% | 0,04% | 0,208466872 |
| PWY-7269           | NAD/NADP-NADH/NADPH mitochondrial interconversion (yeast)            | 0,02% | 0,00% | 0,03% | 0,00% | 0,208504283 |
| PWY-6977           | superpathway of erythromycin biosynthesis                            | 0,04% | 0,06% | 0,03% | 0,02% | 0,208641022 |
| PWY-5080           | very long chain fatty acid biosynthesis I                            | 0,00% | 0,01% | 0,01% | 0,01% | 0,209348196 |



|                     |                                                                                             |       |       |       |       |             |
|---------------------|---------------------------------------------------------------------------------------------|-------|-------|-------|-------|-------------|
| PWY-5194            | siroheme biosynthesis                                                                       | 0,00% | 0,01% | 0,01% | 0,01% | 0,209538838 |
| PWY-4381            | fatty acid biosynthesis initiation (bacteria and plants)                                    | 0,14% | 0,11% | 0,07% | 0,04% | 0,210039381 |
| PWY-7928            | nickel cofactor biosynthesis                                                                | 0,01% | 0,02% | 0,01% | 0,02% | 0,211779315 |
| MET-SAM-PWY         | superpathway of <i>S</i> -adenosyl-L-methionine biosynthesis                                | 0,32% | 0,37% | 0,09% | 0,07% | 0,212156122 |
| PWY-7723            | bacterial bioluminescence                                                                   | 0,03% | 0,01% | 0,03% | 0,02% | 0,21285613  |
| PWY-5384            | sucrose degradation IV (sucrose phosphorylase)                                              | 0,15% | 0,11% | 0,10% | 0,05% | 0,213826055 |
| PWY-3841            | folate transformations II (plants)                                                          | 0,06% | 0,02% | 0,06% | 0,02% | 0,214169324 |
| PWY-6052            | dimethylsulfoniopropanoate degradation III (demethylation)                                  | 0,03% | 0,05% | 0,03% | 0,04% | 0,216051102 |
| PWY-7953            | UDP- <i>N</i> -acetylmuramoyl-pentapeptide biosynthesis III ( <i>meso</i> -diaminopimelate) | 0,04% | 0,02% | 0,02% | 0,02% | 0,216284925 |
| PWY-7077            | <i>N</i> -acetyl-D-galactosamine degradation                                                | 0,05% | 0,03% | 0,04% | 0,03% | 0,216288786 |
| GLUTSYN-PWY         | L-glutamate biosynthesis I                                                                  | 0,10% | 0,14% | 0,06% | 0,06% | 0,216354568 |
| PWY0-1021           | L-alanine biosynthesis III                                                                  | 0,01% | 0,03% | 0,02% | 0,03% | 0,216504444 |
| ALANINE-SYN2-PWY    | L-alanine biosynthesis II                                                                   | 0,04% | 0,02% | 0,04% | 0,02% | 0,21674169  |
| PWY-8034            | spectinabilin biosynthesis                                                                  | 0,05% | 0,02% | 0,05% | 0,01% | 0,216953946 |
| PWY-782             | glycolipid desaturation                                                                     | 0,04% | 0,02% | 0,03% | 0,02% | 0,218533824 |
| PWY-6629            | superpathway of L-tryptophan biosynthesis                                                   | 0,22% | 0,18% | 0,07% | 0,05% | 0,220077909 |
| PWY-6165            | chorismate biosynthesis II (archaea)                                                        | 0,19% | 0,16% | 0,05% | 0,04% | 0,220880098 |
| LPSSYN-PWY          | superpathway of lipopolysaccharide biosynthesis                                             | 0,14% | 0,10% | 0,10% | 0,05% | 0,222222934 |
| PWY-5024            | L-arginine degradation XI                                                                   | 0,27% | 0,31% | 0,07% | 0,04% | 0,222554077 |
| PWY-7751            | shinorine biosynthesis                                                                      | 0,00% | 0,01% | 0,00% | 0,01% | 0,223502457 |
| PWY-7246            | pectin degradation I                                                                        | 0,00% | 0,01% | 0,00% | 0,01% | 0,223531423 |
| PWY-7403            | tetramethylpyrazine degradation                                                             | 0,03% | 0,05% | 0,03% | 0,03% | 0,223668558 |
| ARGDEG-III-PWY      | L-arginine degradation IV (arginine decarboxylase/agmatine deiminase pathway)               | 0,12% | 0,09% | 0,06% | 0,05% | 0,225277585 |
| PWY-7883            | anhydromuropeptides recycling II                                                            | 0,05% | 0,02% | 0,04% | 0,02% | 0,230407116 |
| PWY-7188            | eriodictyol <i>C</i> -glucosylation                                                         | 0,00% | 0,01% | 0,01% | 0,01% | 0,231752357 |
| GLUTAMINEFUM-PWY    | L-glutamine degradation II                                                                  | 0,11% | 0,14% | 0,06% | 0,06% | 0,231858292 |
| PWY-5514            | UDP- <i>N</i> -acetyl-D-galactosamine biosynthesis II                                       | 0,20% | 0,17% | 0,06% | 0,05% | 0,23380396  |
| PWY-7808            | tetracycline resistance                                                                     | 0,01% | 0,04% | 0,02% | 0,06% | 0,234571393 |
| ARABCAT-PWY         | L-arabinose degradation I                                                                   | 0,05% | 0,07% | 0,05% | 0,03% | 0,234699702 |
| PWY0-1565           | D-lactate to cytochrome <i>bo</i> oxidase electron transfer                                 | 0,01% | 0,00% | 0,02% | 0,01% | 0,235955101 |
| PWY-7869            | <i>cis</i> -alkene biosynthesis                                                             | 0,01% | 0,02% | 0,01% | 0,02% | 0,237908379 |
| PWY-7280            | ternatin C3 biosynthesis                                                                    | 0,04% | 0,02% | 0,04% | 0,02% | 0,238044059 |
| PWY-6981            | chitin biosynthesis                                                                         | 0,07% | 0,10% | 0,05% | 0,03% | 0,238743418 |
| PWY0-43             | conversion of succinate to propanoate                                                       | 0,00% | 0,01% | 0,01% | 0,01% | 0,239054275 |
| PWY-6683            | assimilatory sulfate reduction III                                                          | 0,13% | 0,16% | 0,04% | 0,05% | 0,240839176 |
| PWY-5666            | $\alpha$ -solanine/ $\alpha$ -chaconine biosynthesis                                        | 0,03% | 0,01% | 0,02% | 0,01% | 0,241053355 |
| PWY-4821            | UDP- $\alpha$ -D-xylose biosynthesis                                                        | 0,04% | 0,01% | 0,04% | 0,01% | 0,24132808  |
| PYRIDNUCSAL-PWY     | NAD salvage pathway I (PNC VI cycle)                                                        | 0,00% | 0,01% | 0,01% | 0,01% | 0,241875371 |
| PWY-7511            | protein ubiquitination                                                                      | 0,16% | 0,11% | 0,10% | 0,05% | 0,2421294   |
| PWY-7688            | dTDP-D-ravidosamine and dTDP-4-acetyl-D-ravidosamine biosynthesis                           | 0,03% | 0,05% | 0,04% | 0,03% | 0,242199643 |
| PWY-5053            | superpathway of gibberellin GA <sub>12</sub> biosynthesis                                   | 0,13% | 0,10% | 0,05% | 0,05% | 0,242966888 |
| PWY-5178            | toluene degradation IV (aerobic) (via catechol)                                             | 0,13% | 0,10% | 0,05% | 0,05% | 0,242966888 |
| PWY66-387           | $\beta$ -methyl-branched fatty acid $\alpha$ -oxidation                                     | 0,09% | 0,13% | 0,06% | 0,07% | 0,243227004 |
| ASPARAGINE-DEG1-PWY | L-asparagine degradation I                                                                  | 0,12% | 0,05% | 0,11% | 0,03% | 0,243778375 |
| PWY-7174            | <i>S</i> -methyl-5-thio- $\alpha$ -D-ribose 1-phosphate degradation II                      | 0,00% | 0,01% | 0,01% | 0,01% | 0,244793654 |
| PWY-5168            | ferulate and sinapate biosynthesis                                                          | 0,02% | 0,00% | 0,03% | 0,01% | 0,246764039 |

|                  |                                                                     |       |       |       |       |             |
|------------------|---------------------------------------------------------------------|-------|-------|-------|-------|-------------|
| PWY-6685         | glucosylglycerate biosynthesis II                                   | 0,05% | 0,02% | 0,06% | 0,01% | 0,247619433 |
| PWY0-521         | fructoselysine and psicoselysine degradation                        | 0,00% | 0,00% | 0,01% | 0,00% | 0,250065605 |
| PWY-7037         | protein <i>O</i>-glycosylation (Neisseria)                          | 0,01% | 0,02% | 0,01% | 0,03% | 0,251326317 |
| PWY-8105         | queuosine biosynthesis II (queuine salvage)                         | 0,13% | 0,09% | 0,07% | 0,04% | 0,251734257 |
| PWY0-1567        | NADH to cytochrome <i>bo</i> oxidase electron transfer II           | 0,02% | 0,00% | 0,02% | 0,01% | 0,251779615 |
| PWY-7833         | biosynthesis of Lewis epitopes (H. pylori)                          | 0,02% | 0,03% | 0,02% | 0,02% | 0,25306645  |
| PWY-6145         | superpathway of CMP-sialic acids biosynthesis                       | 0,01% | 0,03% | 0,02% | 0,03% | 0,253386557 |
| PWY-5430         | <i>meta</i> cleavage pathway of aromatic compounds                  | 0,11% | 0,08% | 0,06% | 0,05% | 0,253423199 |
| P283-PWY         | hydrogen oxidation I (aerobic)                                      | 0,00% | 0,01% | 0,01% | 0,02% | 0,253644027 |
| PWY-5993         | superpathway of rifamycin B biosynthesis                            | 0,02% | 0,01% | 0,01% | 0,01% | 0,255814328 |
| PWY-8010         | L-cysteine biosynthesis IX (Trichomonas vaginalis)                  | 0,06% | 0,02% | 0,07% | 0,01% | 0,256072081 |
| ANAEROFrucat-PWY | homolactic fermentation                                             | 0,62% | 0,51% | 0,18% | 0,09% | 0,256518738 |
| PWY-7031         | protein <i>N</i>-glycosylation (bacterial)                          | 0,00% | 0,01% | 0,01% | 0,01% | 0,256958052 |
| PWY-7256         | cyanidin diglucoside biosynthesis (acyl-glucose dependent)          | 0,34% | 0,38% | 0,06% | 0,07% | 0,256959157 |
| PWY-6893         | thiamine diphosphate biosynthesis II (Bacillus)                     | 0,03% | 0,05% | 0,02% | 0,03% | 0,257116937 |
| PWY-6936         | seleno-amino acid biosynthesis (plants)                             | 0,02% | 0,04% | 0,03% | 0,02% | 0,258059873 |
| PWY-5055         | nicotinate degradation III                                          | 0,00% | 0,00% | 0,01% | 0,00% | 0,258161213 |
| PWY-1921         | indole-3-acetate activation II                                      | 0,00% | 0,00% | 0,01% | 0,00% | 0,258161213 |
| PWY-5035         | gibberellin biosynthesis III (early C-13 hydroxylation)             | 0,06% | 0,08% | 0,04% | 0,03% | 0,258291255 |
| PWY-43           | putrescine biosynthesis II                                          | 0,06% | 0,08% | 0,04% | 0,03% | 0,258291255 |
| PWY-735          | jasmonic acid biosynthesis                                          | 0,20% | 0,15% | 0,11% | 0,06% | 0,260350276 |
| PWY-5833         | CDP-4-dehydro-3,6-dideoxy-D-glucose biosynthesis                    | 0,03% | 0,06% | 0,04% | 0,04% | 0,261217717 |
| PWY-6134         | L-tyrosine biosynthesis IV                                          | 0,05% | 0,02% | 0,06% | 0,02% | 0,262401209 |
| PWY-7315         | dTDP-<i>N</i>-acetylthomosamine biosynthesis                        | 0,04% | 0,02% | 0,04% | 0,02% | 0,263181965 |
| PWY-6982         | umbelliferone biosynthesis                                          | 0,01% | 0,00% | 0,01% | 0,00% | 0,263762227 |
| PWY0-1569        | autoinducer AI-2 degradation                                        | 0,03% | 0,01% | 0,03% | 0,01% | 0,263844538 |
| TRPSYN-PWY       | L-tryptophan biosynthesis                                           | 0,01% | 0,02% | 0,02% | 0,02% | 0,263863687 |
| PWY-5268         | salvianin biosynthesis                                              | 0,03% | 0,05% | 0,04% | 0,03% | 0,264827911 |
| PWY-7750         | carbon monoxide oxidation to CO<sub>2</sub>                         | 0,03% | 0,05% | 0,04% | 0,03% | 0,264827911 |
| PWY-5441         | S-methyl-L-methionine cycle                                         | 0,03% | 0,05% | 0,04% | 0,03% | 0,264827911 |
| PWY-46           | putrescine biosynthesis III                                         | 0,01% | 0,01% | 0,01% | 0,01% | 0,26507689  |
| PWY-8047         | bryostatin biosynthesis                                             | 0,01% | 0,00% | 0,01% | 0,00% | 0,265134527 |
| PWY-7318         | dTDP-3-acetamido-3,6-dideoxy-&alpha;-D-glucose biosynthesis         | 0,03% | 0,05% | 0,04% | 0,03% | 0,265580495 |
| PWY-7854         | crotonyl-CoA/ethylmalonyl-CoA/hydroxybutyryl-CoA cycle (engineered) | 0,03% | 0,05% | 0,04% | 0,03% | 0,265580495 |
| PWY-7104         | dTDP-L-megosamine biosynthesis                                      | 0,03% | 0,05% | 0,04% | 0,03% | 0,265580495 |
| PWY-6973         | dTDP-D-olivose, dTDP-D-oliose and dTDP-D-mycarose biosynthesis      | 0,03% | 0,05% | 0,04% | 0,03% | 0,265580495 |
| PWY-7872         | D-erythronate degradation I                                         | 0,03% | 0,01% | 0,03% | 0,01% | 0,266464529 |
| PWY-8040         | ansatrienin biosynthesis                                            | 0,01% | 0,03% | 0,02% | 0,03% | 0,266841562 |
| PWY-5340         | sulfate activation for sulfonation                                  | 0,08% | 0,11% | 0,05% | 0,05% | 0,267119064 |
| DARABCAT-PWY     | D-arabinose degradation II                                          | 0,13% | 0,07% | 0,15% | 0,06% | 0,26765012  |
| PWY-6147         | 6-hydroxymethyl-dihydropterin diphosphate biosynthesis I            | 0,04% | 0,06% | 0,03% | 0,02% | 0,267707373 |
| AMMASSIM-PWY     | ammonia assimilation cycle III                                      | 0,26% | 0,23% | 0,02% | 0,05% | 0,267759158 |
| PWY-7389         | superpathway of anaerobic energy metabolism (invertebrates)         | 0,01% | 0,03% | 0,02% | 0,03% | 0,268392975 |
| PWY-7606         | docosaehaenoate biosynthesis III (6-desaturase, mammals)            | 0,00% | 0,00% | 0,01% | 0,00% | 0,268902515 |
| PWY0-1535        | D-serine degradation                                                | 0,00% | 0,01% | 0,01% | 0,01% | 0,269137361 |
| PWY-6244         | bergamotene biosynthesis II                                         | 0,26% | 0,30% | 0,08% | 0,04% | 0,269888127 |

|                     |                                                                                                |       |       |       |       |             |
|---------------------|------------------------------------------------------------------------------------------------|-------|-------|-------|-------|-------------|
| PWY-7959            | 12- <i>epi</i> -hapalindole biosynthesis                                                       | 0,20% | 0,16% | 0,04% | 0,06% | 0,270043297 |
| PWY-5849            | menaquinol-6 biosynthesis                                                                      | 0,01% | 0,01% | 0,01% | 0,01% | 0,27031161  |
| MENAUQUINONESYN-PWY | menaquinol-8 biosynthesis                                                                      | 0,01% | 0,01% | 0,01% | 0,01% | 0,27031161  |
| PWY-5850            | superpathway of menaquinol-6 biosynthesis                                                      | 0,01% | 0,01% | 0,01% | 0,01% | 0,27031161  |
| GALACTUROCAT-PWY    | D-galacturonate degradation I                                                                  | 0,15% | 0,19% | 0,06% | 0,07% | 0,271832889 |
| PWY-7545            | pyruvate to cytochrome <i>bd</i> oxidase electron transfer                                     | 0,05% | 0,03% | 0,06% | 0,02% | 0,272254776 |
| PWY-6540            | costunolide biosynthesis                                                                       | 0,04% | 0,06% | 0,03% | 0,04% | 0,273051847 |
| PWY0-1338           | polymyxin resistance                                                                           | 0,17% | 0,14% | 0,06% | 0,04% | 0,273204501 |
| PWY-7443            | (4S)-carvone biosynthesis                                                                      | 0,00% | 0,01% | 0,00% | 0,02% | 0,273548688 |
| PWY0-1334           | NADH to cytochrome <i>bd</i> oxidase electron transfer I                                       | 0,11% | 0,08% | 0,06% | 0,04% | 0,274702826 |
| PWY66-428           | L-threonine degradation V                                                                      | 0,12% | 0,09% | 0,08% | 0,04% | 0,274876104 |
| GLYCINE-SYN2-PWY    | glycine biosynthesis II                                                                        | 0,08% | 0,06% | 0,05% | 0,03% | 0,275745907 |
| PWY-6823            | molybdenum cofactor biosynthesis                                                               | 0,12% | 0,15% | 0,08% | 0,04% | 0,275924152 |
| PWY0-1561           | glycerol-3-phosphate to cytochrome <i>bo</i> oxidase electron transfer                         | 0,02% | 0,00% | 0,03% | 0,01% | 0,277344215 |
| PWY-7323            | superpathway of GDP-mannose-derived O-antigen building blocks biosynthesis                     | 0,38% | 0,25% | 0,24% | 0,07% | 0,277597135 |
| PWY-4101            | D-sorbitol degradation I                                                                       | 0,15% | 0,11% | 0,09% | 0,05% | 0,277654805 |
| PWY-7092            | neolinstatin bioactivation                                                                     | 0,04% | 0,06% | 0,03% | 0,03% | 0,277756158 |
| PWY-6802            | salidroside biosynthesis                                                                       | 0,29% | 0,33% | 0,06% | 0,07% | 0,277969797 |
| PWY0-461            | L-lysine degradation I                                                                         | 0,04% | 0,02% | 0,04% | 0,02% | 0,279227434 |
| PWY-5105            | hesperitin glycoside biosynthesis                                                              | 0,01% | 0,00% | 0,02% | 0,00% | 0,279638201 |
| PWY-6580            | phosphatidylinositol biosynthesis I (bacteria)                                                 | 0,01% | 0,00% | 0,02% | 0,00% | 0,279638201 |
| PWY1G-0             | mycothiol biosynthesis                                                                         | 0,01% | 0,00% | 0,02% | 0,00% | 0,279638201 |
| COMPLETE-ARO-PWY    | superpathway of aromatic amino acid biosynthesis                                               | 0,02% | 0,00% | 0,03% | 0,01% | 0,280690746 |
| PWY-5939            | pyruvate fermentation to ( <i>R</i> )-acetoin II                                               | 0,02% | 0,00% | 0,03% | 0,01% | 0,280690746 |
| PWY0-166            | superpathway of pyrimidine deoxyribonucleotides <i>de novo</i> biosynthesis ( <i>E. coli</i> ) | 0,02% | 0,00% | 0,03% | 0,01% | 0,280779356 |
| PWY0-1353           | succinate to cytochrome <i>bd</i> oxidase electron transfer                                    | 0,17% | 0,13% | 0,09% | 0,06% | 0,282058444 |
| PWY-6676            | superpathway of sulfide oxidation (phototrophic sulfur bacteria)                               | 0,00% | 0,01% | 0,00% | 0,01% | 0,283244425 |
| PWY-7663            | gondoate biosynthesis (anaerobic)                                                              | 0,11% | 0,16% | 0,02% | 0,09% | 0,285394598 |
| PWY-7664            | oleate biosynthesis IV (anaerobic)                                                             | 0,11% | 0,16% | 0,02% | 0,09% | 0,285394598 |
| PWY-7884            | lipoprotein posttranslational modification                                                     | 0,01% | 0,00% | 0,01% | 0,00% | 0,285739307 |
| PWY-6954            | superpathway of aromatic compound degradation via 2-hydroxypentadienoate                       | 0,12% | 0,09% | 0,06% | 0,05% | 0,2873241   |
| PWY4FS-12           | VTC2 cycle                                                                                     | 0,05% | 0,02% | 0,06% | 0,02% | 0,287866894 |
| SULFMETII-PWY       | assimilatory sulfate reduction II                                                              | 0,07% | 0,10% | 0,05% | 0,04% | 0,287976825 |
| PWY-5162            | 2-hydroxypenta-2,4-dienoate degradation                                                        | 0,02% | 0,03% | 0,03% | 0,02% | 0,288102386 |
| THIOREDOX-PWY       | thioredoxin pathway                                                                            | 0,14% | 0,11% | 0,06% | 0,04% | 0,289596551 |
| ARGSPECAT-PWY       | spermine biosynthesis                                                                          | 0,00% | 0,00% | 0,01% | 0,01% | 0,291469016 |
| PWY-7853            | 6-hydroxymethyl-dihydropterin diphosphate biosynthesis V ( <i>Pyrococcus</i> )                 | 0,01% | 0,00% | 0,02% | 0,00% | 0,29203272  |
| PWY3DJ-11281        | sphingomyelin metabolism                                                                       | 0,06% | 0,08% | 0,05% | 0,04% | 0,29249132  |
| PWY0-1591           | glycerol-3-phosphate to hydrogen peroxide electron transport                                   | 0,01% | 0,02% | 0,01% | 0,02% | 0,293534265 |
| PWY-5984            | rifamycin B biosynthesis                                                                       | 0,02% | 0,00% | 0,03% | 0,01% | 0,293764132 |
| PWY-7312            | dTDP-D-&beta;-fucufuranose biosynthesis                                                        | 0,01% | 0,00% | 0,02% | 0,00% | 0,294569672 |
| PWY-6784            | cellulose and hemicellulose degradation (cellulosome)                                          | 0,01% | 0,02% | 0,01% | 0,02% | 0,295367996 |
| PWY-5405            | superpathway of betalain biosynthesis                                                          | 0,00% | 0,00% | 0,00% | 0,01% | 0,295466791 |
| PWY-7417            | phospholipid remodeling (phosphatidate, yeast)                                                 | 0,03% | 0,01% | 0,04% | 0,01% | 0,295769097 |
| PWY-5207            | coenzyme B/coenzyme M regeneration I (methanophenazine-dependent)                              | 0,03% | 0,01% | 0,03% | 0,01% | 0,299210563 |
| METHIONINE-DEG1-PWY | L-methionine degradation I (to L-homocysteine)                                                 | 0,07% | 0,03% | 0,07% | 0,03% | 0,299892708 |

|                   |                                                                             |       |       |       |       |             |
|-------------------|-----------------------------------------------------------------------------|-------|-------|-------|-------|-------------|
| PWY-6947          | superpathway of cholesterol degradation II (cholesterol dehydrogenase)      | 0,05% | 0,07% | 0,04% | 0,03% | 0,30116367  |
| PWY-6061          | bile acid biosynthesis, neutral pathway                                     | 0,01% | 0,00% | 0,01% | 0,01% | 0,302141634 |
| PWY-5345          | superpathway of L-methionine biosynthesis (by sulfhydrylation)              | 0,24% | 0,27% | 0,06% | 0,05% | 0,302471524 |
| PWY-7711          | calonectrin biosynthesis                                                    | 0,02% | 0,03% | 0,02% | 0,02% | 0,303154379 |
| PWY-6447          | trichome monoterpenes biosynthesis                                          | 0,00% | 0,01% | 0,01% | 0,01% | 0,303778808 |
| PWY-5950          | geosmin biosynthesis                                                        | 0,01% | 0,00% | 0,02% | 0,01% | 0,304422978 |
| PWY-6292          | superpathway of L-cysteine biosynthesis (mammalian)                         | 0,10% | 0,04% | 0,13% | 0,03% | 0,305527384 |
| PWY-6010          | apigenin glycosides biosynthesis                                            | 0,02% | 0,03% | 0,02% | 0,02% | 0,305742733 |
| PWY-5101          | L-isoleucine biosynthesis II                                                | 0,40% | 0,48% | 0,16% | 0,14% | 0,306033357 |
| SALVADEHYPOX-PWY  | adenosine nucleotides degradation II                                        | 0,06% | 0,09% | 0,04% | 0,05% | 0,30922617  |
| PWY-6080          | 4-ethylphenol degradation (anaerobic)                                       | 0,01% | 0,01% | 0,01% | 0,01% | 0,309295968 |
| PWY-5517          | L-arabinose degradation III                                                 | 0,06% | 0,08% | 0,05% | 0,03% | 0,311526079 |
| PWY-6617          | adenosine nucleotides degradation III                                       | 0,01% | 0,00% | 0,02% | 0,01% | 0,312059546 |
| CALVIN-PWY        | Calvin-Benson-Bassham cycle                                                 | 0,25% | 0,23% | 0,02% | 0,05% | 0,312918848 |
| PWY-6987          | lipoate biosynthesis and incorporation III (Bacillus)                       | 0,06% | 0,04% | 0,04% | 0,02% | 0,313960073 |
| PWY-621           | sucrose degradation III (sucrose invertase)                                 | 0,00% | 0,02% | 0,01% | 0,02% | 0,31412435  |
| PWY-6290          | &beta;-cubebene biosynthesis                                                | 0,04% | 0,03% | 0,03% | 0,02% | 0,314990918 |
| GLYOXYLATE-BYPASS | glyoxylate cycle                                                            | 0,07% | 0,06% | 0,02% | 0,03% | 0,315546726 |
| PWY-7039          | phosphatidate metabolism, as a signaling molecule                           | 0,01% | 0,02% | 0,01% | 0,02% | 0,315700152 |
| DETOX1-PWY-1      | reactive oxygen species degradation                                         | 0,01% | 0,02% | 0,01% | 0,02% | 0,316212501 |
| PWY-3161          | indole-3-acetate biosynthesis III (bacteria)                                | 0,04% | 0,02% | 0,04% | 0,01% | 0,317810989 |
| PWY-7665          | aureobasidin A biosynthesis                                                 | 0,04% | 0,02% | 0,04% | 0,01% | 0,317810989 |
| CYSTSYN-PWY       | L-cysteine biosynthesis I                                                   | 0,04% | 0,02% | 0,04% | 0,01% | 0,317810989 |
| PWY-5662          | glucosylglycerate biosynthesis I                                            | 0,04% | 0,02% | 0,04% | 0,01% | 0,317810989 |
| PWY-6692          | Fe(II) oxidation                                                            | 0,04% | 0,02% | 0,04% | 0,01% | 0,317810989 |
| THIOSULFOX-PWY    | thiosulfate oxidation I (to tetrathionate)                                  | 0,04% | 0,02% | 0,04% | 0,01% | 0,317810989 |
| PWY4FS-11         | L-ascorbate biosynthesis II (L-gulose pathway)                              | 0,04% | 0,02% | 0,04% | 0,01% | 0,317810989 |
| P282-PWY          | nitrite oxidation                                                           | 0,04% | 0,02% | 0,04% | 0,01% | 0,317810989 |
| P581-PWY          | thiocyanate degradation I                                                   | 0,04% | 0,02% | 0,04% | 0,01% | 0,317810989 |
| PWY-7279          | aerobic respiration II (cytochrome c) (yeast)                               | 0,04% | 0,02% | 0,04% | 0,01% | 0,317810989 |
| PWY-4521          | arsenite oxidation I (respiratory)                                          | 0,04% | 0,02% | 0,04% | 0,01% | 0,317810989 |
| PWY-6464          | polyvinyl alcohol degradation                                               | 0,04% | 0,02% | 0,04% | 0,01% | 0,317810989 |
| PWY-6523          | nitrite-dependent anaerobic methane oxidation                               | 0,04% | 0,02% | 0,04% | 0,01% | 0,317810989 |
| PWY-5458          | methylglyoxal degradation V                                                 | 0,04% | 0,02% | 0,04% | 0,01% | 0,317810989 |
| AMMOXID-PWY       | ammonia oxidation I (aerobic)                                               | 0,04% | 0,02% | 0,04% | 0,01% | 0,317810989 |
| PWY-5274          | sulfide oxidation II (flavocytochrome <i>c</i> )                            | 0,04% | 0,02% | 0,04% | 0,01% | 0,317810989 |
| PWY-5304          | superpathway of sulfur oxidation ( <i>Acidianus ambivalens</i> )            | 0,04% | 0,02% | 0,04% | 0,01% | 0,317810989 |
| PWY-7084          | nitrifier denitrification                                                   | 0,04% | 0,02% | 0,04% | 0,01% | 0,317810989 |
| PWY-5335          | superpathway of sulfide oxidation ( <i>Starkeya novella</i> )               | 0,04% | 0,02% | 0,04% | 0,01% | 0,317810989 |
| PWY-5308          | superpathway of sulfur metabolism ( <i>Desulfocapsa sulfoexigens</i> )      | 0,04% | 0,02% | 0,04% | 0,01% | 0,317810989 |
| PWY-5294          | superpathway of sulfide oxidation ( <i>Acidithiobacillus ferrooxidans</i> ) | 0,04% | 0,02% | 0,04% | 0,01% | 0,317810989 |
| PWY-7082          | ammonia oxidation IV (autotrophic ammonia oxidizers)                        | 0,04% | 0,02% | 0,04% | 0,01% | 0,317810989 |
| PWY0-981          | taurine degradation IV                                                      | 0,01% | 0,00% | 0,01% | 0,00% | 0,318796673 |
| PWY-7909          | formaldehyde oxidation VII (THF pathway)                                    | 0,09% | 0,06% | 0,08% | 0,04% | 0,320199074 |
| PWY-5419          | catechol degradation to 2-hydroxypentadienoate II                           | 0,11% | 0,08% | 0,06% | 0,05% | 0,321452081 |
| PWY-5420          | catechol degradation II ( <i>meta</i> -cleavage pathway)                    | 0,11% | 0,08% | 0,06% | 0,05% | 0,321452081 |

|                       |                                                                                |       |       |       |       |             |
|-----------------------|--------------------------------------------------------------------------------|-------|-------|-------|-------|-------------|
| PWY-5823              | superpathway of CDP-glucose-derived O-antigen building blocks biosynthesis     | 0,04% | 0,06% | 0,04% | 0,05% | 0,324620106 |
| PWY-7794              | polyethylene terephthalate degradation                                         | 0,33% | 0,27% | 0,13% | 0,10% | 0,327363062 |
| PWY-6461              | peptidoglycan cross-bridge biosynthesis II (E. faecium)                        | 0,00% | 0,01% | 0,01% | 0,01% | 0,328221297 |
| PWY-7544              | pyruvate to cytochrome <i>c</i> <sub>1</sub> oxidase electron transfer         | 0,03% | 0,01% | 0,03% | 0,01% | 0,329091279 |
| PWY-3721              | choline degradation II                                                         | 0,01% | 0,00% | 0,01% | 0,00% | 0,33003388  |
| PWY-6396              | superpathway of 2,3-butanediol biosynthesis                                    | 0,02% | 0,01% | 0,03% | 0,01% | 0,331333958 |
| PWY18C3-9             | diacylsucrose biosynthesis ( <i>Solanum</i> )                                  | 0,03% | 0,06% | 0,03% | 0,06% | 0,33187196  |
| FASYN-ELONG-PWY       | fatty acid elongation -- saturated                                             | 0,15% | 0,21% | 0,05% | 0,13% | 0,33299067  |
| PWY1G01-4             | glutarate degradation                                                          | 0,04% | 0,02% | 0,04% | 0,01% | 0,333770182 |
| PWY-7873              | D-erythronate degradation II                                                   | 0,04% | 0,02% | 0,04% | 0,01% | 0,333770182 |
| PWY-7741              | phthiocerol biosynthesis                                                       | 0,00% | 0,00% | 0,00% | 0,01% | 0,335339962 |
| PWY-7458              | violodelphin biosynthesis                                                      | 0,00% | 0,00% | 0,00% | 0,01% | 0,335339962 |
| PWY-7259              | pelargonidin diglucoside biosynthesis (acyl-glucose dependent)                 | 0,00% | 0,00% | 0,00% | 0,01% | 0,335339962 |
| PWY-7260              | delphinidin diglucoside biosynthesis (acyl-glucose dependent)                  | 0,00% | 0,00% | 0,00% | 0,01% | 0,335339962 |
| PWY-5370              | carbon tetrachloride degradation I                                             | 0,01% | 0,00% | 0,02% | 0,01% | 0,335725001 |
| PWY0-1544             | proline to cytochrome <i>c</i> <sub>1</sub> oxidase electron transfer          | 0,02% | 0,00% | 0,03% | 0,01% | 0,337712014 |
| PWY-7385              | 1,3-propanediol biosynthesis (engineered)                                      | 0,43% | 0,38% | 0,11% | 0,08% | 0,340082871 |
| GOLPDLCAT-PWY         | superpathway of glycerol degradation to 1,3-propanediol                        | 0,01% | 0,01% | 0,01% | 0,01% | 0,340781649 |
| PWY-40                | putrescine biosynthesis I                                                      | 0,05% | 0,07% | 0,03% | 0,04% | 0,340855389 |
| ARGDEG-PWY            | superpathway of L-arginine, putrescine, and 4-aminobutanoate degradation       | 0,03% | 0,01% | 0,05% | 0,01% | 0,341163979 |
| PWY-5921              | glutaminyl-tRNA <sup>gln</sup> biosynthesis via transamidation                 | 0,24% | 0,27% | 0,04% | 0,10% | 0,342115845 |
| PWY-5837              | 2-carboxy-1,4-naphthoquinol biosynthesis                                       | 0,05% | 0,03% | 0,03% | 0,03% | 0,343806261 |
| PWY-7666              | galactolipid biosynthesis II                                                   | 0,01% | 0,02% | 0,01% | 0,02% | 0,344634066 |
| PWY-5159              | <i>trans</i> -4-hydroxy-L-proline degradation II                               | 0,01% | 0,00% | 0,01% | 0,01% | 0,344779081 |
| PWY-6131              | glycerol degradation II                                                        | 0,04% | 0,05% | 0,03% | 0,02% | 0,346379378 |
| ASPARAGINE-DEG1-PWY-1 | L-asparagine degradation III (mammalian)                                       | 0,01% | 0,01% | 0,01% | 0,01% | 0,348141417 |
| PWY-7777              | isoprene degradation                                                           | 0,05% | 0,06% | 0,04% | 0,03% | 0,348202983 |
| PWY-6902              | chitin degradation II (Vibrio)                                                 | 0,01% | 0,02% | 0,01% | 0,02% | 0,348614106 |
| PWY-5130              | 2-oxobutanoate degradation I                                                   | 0,07% | 0,04% | 0,06% | 0,04% | 0,348702674 |
| PWY-8118              | patellamide A and C biosynthesis                                               | 0,01% | 0,00% | 0,01% | 0,01% | 0,349066135 |
| PWY-5114              | UDP-sugars interconversion                                                     | 0,04% | 0,02% | 0,04% | 0,01% | 0,350690426 |
| PWY-7557              | (-)-dehydrodiconiferyl alcohol degradation                                     | 0,00% | 0,01% | 0,01% | 0,01% | 0,351095645 |
| PROPIONMET-PWY        | propanoyl CoA degradation I                                                    | 0,02% | 0,04% | 0,01% | 0,04% | 0,352474526 |
| PWY-7530              | &beta;-D-galactosaminyl-(1→3)- <i>N</i> -acetyl-α-D-galactosamine biosynthesis | 0,00% | 0,01% | 0,00% | 0,02% | 0,352614974 |
| PHENOLDEG-PWY         | phenol degradation II (anaerobic)                                              | 0,01% | 0,01% | 0,01% | 0,01% | 0,354094825 |
| PWY-8148              | NADP biosynthesis                                                              | 0,03% | 0,02% | 0,03% | 0,02% | 0,35668519  |
| PWY-6140              | CMP-2-keto-3-deoxy-D- <i>glycero</i> -D- <i>galacto</i> -nononate biosynthesis | 0,01% | 0,00% | 0,01% | 0,01% | 0,357799822 |
| BSUBPOLYAMSYN-PWY     | spermidine biosynthesis I                                                      | 0,01% | 0,01% | 0,01% | 0,01% | 0,357935972 |
| PWY-6463              | peptidoglycan cross-bridge biosynthesis IV (Weissella viridescens)             | 0,05% | 0,09% | 0,06% | 0,07% | 0,357941617 |
| P23-PWY               | reductive TCA cycle I                                                          | 0,36% | 0,33% | 0,08% | 0,07% | 0,359127239 |
| PWY-6258              | patchoulol biosynthesis                                                        | 0,35% | 0,31% | 0,09% | 0,05% | 0,359508841 |
| PWY-6004              | glycine betaine biosynthesis V (from glycine)                                  | 0,05% | 0,04% | 0,04% | 0,02% | 0,359694278 |
| PWY-5789              | 3-hydroxypropanoate/4-hydroxybutanoate cycle                                   | 0,00% | 0,00% | 0,00% | 0,01% | 0,362061875 |
| PWY-7056              | daphnin interconversion                                                        | 0,07% | 0,05% | 0,04% | 0,03% | 0,362828429 |
| 4TOLCARBDEG-PWY       | 4-toluenecarboxylate degradation                                               | 0,07% | 0,05% | 0,04% | 0,03% | 0,362828429 |
| PWY-7029              | terminal olefins biosynthesis II                                               | 0,00% | 0,01% | 0,00% | 0,02% | 0,36552971  |



|                   |                                                               |       |       |       |       |             |
|-------------------|---------------------------------------------------------------|-------|-------|-------|-------|-------------|
| PWY-5755          | 4-hydroxybenzoate biosynthesis II (bacteria)                  | 0,19% | 0,23% | 0,11% | 0,07% | 0,365750803 |
| PWY-7529          | CMP-<i>N</i>-acetyl-7-<i>O</i>-acetylneuraminate biosynthesis | 0,21% | 0,18% | 0,06% | 0,07% | 0,365785067 |
| PWY-7805          | (aminomethyl)phosphonate degradation                          | 0,03% | 0,05% | 0,04% | 0,03% | 0,368553972 |
| PWY-4121          | glutathionylspermidine biosynthesis                           | 0,00% | 0,00% | 0,01% | 0,00% | 0,368632449 |
| PWY-6060          | malonate degradation II (biotin-dependent)                    | 0,00% | 0,01% | 0,01% | 0,01% | 0,368975626 |
| PWY-4161          | superpathway of benzoxazinoid glucosides biosynthesis         | 0,00% | 0,01% | 0,01% | 0,01% | 0,368975626 |
| PWY-5973          | <i>cis</i>-vaccenate biosynthesis                             | 0,12% | 0,16% | 0,04% | 0,10% | 0,369054869 |
| SO4ASSIM-PWY      | assimilatory sulfate reduction I                              | 0,14% | 0,16% | 0,04% | 0,05% | 0,36967635  |
| PWY-5530          | sorbitol biosynthesis II                                      | 0,01% | 0,00% | 0,01% | 0,01% | 0,370256882 |
| PWY-7729          | 5,6-dimethylbenzimidazole biosynthesis II (anaerobic)         | 0,02% | 0,00% | 0,03% | 0,02% | 0,37191231  |
| PWY-7176          | UTP and CTP <i>de novo</i> biosynthesis                       | 0,24% | 0,28% | 0,09% | 0,07% | 0,37256219  |
| PWY-5643          | 2,6-dinitrotoluene degradation                                | 0,06% | 0,04% | 0,07% | 0,04% | 0,37300057  |
| PWY0-1335         | NADH to cytochrome <i>bo</i> oxidase electron transfer I      | 0,08% | 0,06% | 0,07% | 0,04% | 0,373361508 |
| ORNDEG-PWY        | superpathway of ornithine degradation                         | 0,03% | 0,01% | 0,04% | 0,02% | 0,373403511 |
| PWY-5766          | L-glutamate degradation X                                     | 0,02% | 0,03% | 0,02% | 0,02% | 0,373696099 |
| PWY-6805          | cellulose degradation I (cellulosome)                         | 0,01% | 0,00% | 0,01% | 0,00% | 0,373900966 |
| PUTDEG-PWY        | putrescine degradation I                                      | 0,00% | 0,00% | 0,00% | 0,00% | 0,373900966 |
| PWY-7457          | sulfite oxidation V (SoeABC)                                  | 0,01% | 0,00% | 0,03% | 0,00% | 0,373900966 |
| PWY-6648          | rhamnolipid biosynthesis                                      | 0,00% | 0,00% | 0,01% | 0,00% | 0,373900966 |
| PWY-7057          | cichoriin interconversion                                     | 0,01% | 0,00% | 0,02% | 0,00% | 0,373900966 |
| PWY-6271          | eudesmol biosynthesis                                         | 0,00% | 0,00% | 0,00% | 0,00% | 0,373900966 |
| PWY-801           | homocysteine and cysteine interconversion                     | 0,00% | 0,00% | 0,01% | 0,00% | 0,373900966 |
| PWY0-44           | D-allose degradation                                          | 0,00% | 0,00% | 0,00% | 0,00% | 0,373900966 |
| PWY0-1599         | periplasmic disulfide bond formation                          | 0,00% | 0,00% | 0,01% | 0,00% | 0,373900966 |
| PWY-4601          | arsenate reduction (respiratory)                              | 0,00% | 0,00% | 0,00% | 0,00% | 0,373900966 |
| P303-PWY          | ammonia oxidation II (anaerobic)                              | 0,00% | 0,00% | 0,01% | 0,00% | 0,373900966 |
| PWY-6681          | neurosporaxanthin biosynthesis                                | 0,00% | 0,00% | 0,00% | 0,00% | 0,373900966 |
| PWY-5929          | puromycin biosynthesis                                        | 0,00% | 0,00% | 0,00% | 0,00% | 0,373900966 |
| PWY-8080          | kainate biosynthesis                                          | 0,00% | 0,00% | 0,01% | 0,00% | 0,373900966 |
| PWYQT-4476        | indole glucosinolate activation (herbivore attack)            | 0,00% | 0,00% | 0,01% | 0,00% | 0,373900966 |
| PWY18C3-16        | acylsucrose biosynthesis (<i>Solanum habrochaites</i>)        | 0,00% | 0,00% | 0,00% | 0,00% | 0,373900966 |
| UDPNAGSYN-PWY     | UDP-<i>N</i>-acetyl-D-glucosamine biosynthesis I              | 0,00% | 0,00% | 0,01% | 0,00% | 0,373900966 |
| PWY-7627          | 2,4,6-trinitrophenol and 2,4-dinitrophenol degradation        | 0,00% | 0,00% | 0,01% | 0,00% | 0,373900966 |
| PWY-7720          | ophiobolin F biosynthesis                                     | 0,00% | 0,00% | 0,00% | 0,00% | 0,373900966 |
| PWY-8087          | indole-3-acetate degradation II                               | 0,00% | 0,00% | 0,01% | 0,00% | 0,373900966 |
| PWY-7924          | rubber degradation I                                          | 0,00% | 0,00% | 0,00% | 0,00% | 0,373900966 |
| PWY-6932          | selenate reduction                                            | 0,01% | 0,00% | 0,01% | 0,00% | 0,373900966 |
| PWY-6591          | manganese oxidation I                                         | 0,00% | 0,00% | 0,01% | 0,00% | 0,373900966 |
| PWY-6592          | manganese oxidation II                                        | 0,00% | 0,00% | 0,01% | 0,00% | 0,373900966 |
| PWY-7987          | vanchrobactin biosynthesis                                    | 0,00% | 0,00% | 0,01% | 0,00% | 0,373900966 |
| P483-PWY          | phosphonoacetate degradation                                  | 0,00% | 0,00% | 0,01% | 0,00% | 0,373900966 |
| ALKANEMONOX-PWY   | two-component alkanesulfonate monooxygenase                   | 0,00% | 0,00% | 0,01% | 0,00% | 0,373900966 |
| AEROBACTINSYN-PWY | aerobactin biosynthesis                                       | 0,02% | 0,00% | 0,03% | 0,00% | 0,373900966 |
| PWY-6173          | histamine biosynthesis                                        | 0,02% | 0,00% | 0,03% | 0,00% | 0,373900966 |
| PWY-5856          | ubiquinol-9 biosynthesis (prokaryotic)                        | 0,00% | 0,00% | 0,00% | 0,00% | 0,373900966 |
| 2PHENDEG-PWY      | phenylethylamine degradation I                                | 0,00% | 0,00% | 0,01% | 0,00% | 0,373900966 |

|                     |                                                                                              |       |       |       |       |             |
|---------------------|----------------------------------------------------------------------------------------------|-------|-------|-------|-------|-------------|
| PWY1YI0-6           | aerobic respiration in cyanobacteria (NDH-2 to cytochrome <i>c</i> oxidase via plastocyanin) | 0,00% | 0,00% | 0,01% | 0,00% | 0,373900966 |
| PWY66-366           | flavin biosynthesis IV (mammalian)                                                           | 0,00% | 0,00% | 0,01% | 0,00% | 0,373900966 |
| PWY-5280            | L-lysine degradation IV                                                                      | 0,01% | 0,00% | 0,02% | 0,00% | 0,373900966 |
| NOPALINEDEG-PWY     | nopaline degradation                                                                         | 0,00% | 0,00% | 0,00% | 0,00% | 0,373900966 |
| PWY-6328            | L-lysine degradation X                                                                       | 0,01% | 0,00% | 0,02% | 0,00% | 0,373900966 |
| GLUTATHIONESYN-PWY  | glutathione biosynthesis                                                                     | 0,00% | 0,00% | 0,00% | 0,00% | 0,373900966 |
| PWY-7113            | furcatin degradation                                                                         | 0,00% | 0,00% | 0,01% | 0,00% | 0,373900966 |
| PWY30-4106          | NAD salvage pathway IV (from nicotinamide riboside)                                          | 0,00% | 0,00% | 0,01% | 0,00% | 0,373900966 |
| PWY-7737            | thiocoraline biosynthesis                                                                    | 0,00% | 0,00% | 0,01% | 0,00% | 0,373900966 |
| PWY-7999            | vitamin K-epoxide cycle                                                                      | 0,00% | 0,00% | 0,00% | 0,00% | 0,373900966 |
| PWY-7986            | anguibactin biosynthesis                                                                     | 0,00% | 0,00% | 0,01% | 0,00% | 0,373900966 |
| PWY-6289            | petrobactin biosynthesis                                                                     | 0,00% | 0,00% | 0,01% | 0,00% | 0,373900966 |
| PWY-6679            | jadomycin biosynthesis                                                                       | 0,01% | 0,00% | 0,02% | 0,00% | 0,373900966 |
| PWY-5770            | phenazine-1-carboxylate biosynthesis                                                         | 0,00% | 0,00% | 0,00% | 0,00% | 0,373900966 |
| PWY-283             | benzoate degradation II (aerobic and anaerobic)                                              | 0,00% | 0,00% | 0,00% | 0,00% | 0,373900966 |
| PWY-702             | L-methionine biosynthesis II (plants)                                                        | 0,00% | 0,00% | 0,01% | 0,00% | 0,373900966 |
| PWY-8061            | 8-oxo-(d)GTP detoxification II                                                               | 0,00% | 0,00% | 0,00% | 0,00% | 0,373900966 |
| PWY-5945            | violaxanthin, antheraxanthin and zeaxanthin interconversion                                  | 0,00% | 0,00% | 0,00% | 0,00% | 0,373900966 |
| PWY-7645            | hyaluronan degradation                                                                       | 0,00% | 0,00% | 0,00% | 0,00% | 0,373900966 |
| PWY-7849            | urate conversion to allantoin III                                                            | 0,00% | 0,00% | 0,01% | 0,00% | 0,373900966 |
| PWY-6336            | protocatechuate degradation III (cleavage pathway)                                           | 0,00% | 0,00% | 0,00% | 0,00% | 0,373900966 |
| PWY-6071            | superpathway of phenylethylamine degradation                                                 | 0,01% | 0,00% | 0,02% | 0,00% | 0,373900966 |
| PWY-5174            | capsanthin and capsorubin biosynthesis                                                       | 0,00% | 0,00% | 0,00% | 0,00% | 0,373900966 |
| PWY0-1527           | curcumin degradation                                                                         | 0,00% | 0,00% | 0,00% | 0,00% | 0,373900966 |
| PWY-5350            | thiosulfate disproportionation IV (rhodanese)                                                | 0,00% | 0,00% | 0,00% | 0,00% | 0,373900966 |
| CAROTENOID-PWY      | superpathway of carotenoid biosynthesis in plants                                            | 0,00% | 0,00% | 0,00% | 0,00% | 0,373900966 |
| 4AMINO BUTMETAB-PWY | superpathway of 4-aminobutanoate degradation                                                 | 0,01% | 0,00% | 0,02% | 0,00% | 0,373900966 |
| PWY3DJ-12           | ceramide <i>de novo</i> biosynthesis                                                         | 0,00% | 0,00% | 0,01% | 0,00% | 0,373900966 |
| PWY-6827            | gellan degradation                                                                           | 0,00% | 0,00% | 0,00% | 0,00% | 0,373900966 |
| PWY-6765            | hydrogen production IV                                                                       | 0,01% | 0,01% | 0,01% | 0,01% | 0,373917022 |
| PWY0-1297           | superpathway of purine deoxyribonucleosides degradation                                      | 0,00% | 0,01% | 0,01% | 0,02% | 0,375325989 |
| PWY-5046            | 2-oxoisovalerate decarboxylation to isobutanoyl-CoA                                          | 0,00% | 0,01% | 0,01% | 0,02% | 0,375325989 |
| PWY-8073            | lipid IV<sub>A</sub> biosynthesis (<i>P. putida</i>)                                         | 0,02% | 0,00% | 0,03% | 0,01% | 0,375458029 |
| PWY-4681            | kievitone biosynthesis                                                                       | 0,08% | 0,11% | 0,09% | 0,05% | 0,375833297 |
| PWY18C3-22          | methylsalicylate biosynthesis                                                                | 0,04% | 0,01% | 0,07% | 0,01% | 0,377121037 |
| PWY0-1275           | lipoate biosynthesis and incorporation II                                                    | 0,05% | 0,03% | 0,03% | 0,01% | 0,377654688 |
| PWY-5041            | <i>S</i>-adenosyl-L-methionine cycle II                                                      | 0,07% | 0,04% | 0,07% | 0,03% | 0,381920901 |
| PWY-7962            | adenosylcobinamide-GDP biosynthesis from cobyrinate <i>a,c</i>-diamide                       | 0,01% | 0,00% | 0,01% | 0,01% | 0,382028751 |
| ANAGLYCOLYSIS-PWY   | glycolysis III (from glucose)                                                                | 0,55% | 0,45% | 0,21% | 0,07% | 0,382658143 |
| PWY-7147            | 8-amino-7-oxononanoate biosynthesis II                                                       | 0,08% | 0,06% | 0,05% | 0,04% | 0,383263103 |
| PWY-7304            | 3-amino-4,7-dihydroxy-coumarin biosynthesis                                                  | 0,00% | 0,00% | 0,00% | 0,00% | 0,383710588 |
| PWY0-162            | superpathway of pyrimidine ribonucleotides <i>de novo</i> biosynthesis                       | 0,59% | 0,64% | 0,10% | 0,12% | 0,38377381  |
| PWY-8117            | colibactin biosynthesis                                                                      | 0,00% | 0,02% | 0,00% | 0,04% | 0,384361109 |
| PWY-6587            | pyruvate fermentation to ethanol III                                                         | 0,05% | 0,03% | 0,04% | 0,03% | 0,385625841 |
| PWY-3901            | berberine biosynthesis                                                                       | 0,00% | 0,00% | 0,00% | 0,00% | 0,38647747  |
| PWY-7976            | sulfur reduction III                                                                         | 0,00% | 0,00% | 0,00% | 0,00% | 0,38647747  |

|                   |                                                                                                                   |       |       |       |       |             |
|-------------------|-------------------------------------------------------------------------------------------------------------------|-------|-------|-------|-------|-------------|
| PWY-5695          | inosine 5'-phosphate degradation                                                                                  | 0,01% | 0,01% | 0,01% | 0,01% | 0,386775671 |
| PWY-7387          | hypotaurine degradation                                                                                           | 0,00% | 0,00% | 0,00% | 0,00% | 0,388233547 |
| PWY-8058          | 2-deoxy-D-ribose degradation II                                                                                   | 0,04% | 0,02% | 0,04% | 0,01% | 0,389100391 |
| PWY-6317          | D-galactose degradation I (Leloir pathway)                                                                        | 0,10% | 0,13% | 0,07% | 0,04% | 0,389123214 |
| FORMASS-PWY       | formaldehyde oxidation IV (thiol-independent)                                                                     | 0,00% | 0,00% | 0,00% | 0,00% | 0,389688342 |
| PWY-6967          | methylamine degradation I                                                                                         | 0,04% | 0,02% | 0,06% | 0,02% | 0,3898628   |
| PWY-1701          | methanol and methylamine oxidation to formaldehyde                                                                | 0,04% | 0,02% | 0,06% | 0,02% | 0,3898628   |
| PWY66-429         | fatty acid biosynthesis initiation (mitochondria)                                                                 | 0,01% | 0,02% | 0,02% | 0,02% | 0,390802909 |
| PWY-5727          | atrazine degradation II                                                                                           | 0,13% | 0,17% | 0,10% | 0,09% | 0,391022377 |
| PANTOSYN-PWY      | superpathway of coenzyme A biosynthesis I (bacteria)                                                              | 0,11% | 0,13% | 0,04% | 0,05% | 0,393094857 |
| PWY1-2            | L-alanine degradation IV                                                                                          | 0,03% | 0,05% | 0,03% | 0,03% | 0,393294073 |
| PWY-4983          | nitric oxide biosynthesis II (mammals)                                                                            | 0,00% | 0,01% | 0,00% | 0,01% | 0,393339233 |
| PWY-7050          | icosapentaenoate biosynthesis IV (bacteria)                                                                       | 0,00% | 0,00% | 0,00% | 0,01% | 0,395094945 |
| PWY-5981          | CDP-diacylglycerol biosynthesis III                                                                               | 0,08% | 0,10% | 0,05% | 0,04% | 0,396051203 |
| PWY-7657          | dTDP-&beta;-L-digitoxose biosynthesis                                                                             | 0,01% | 0,02% | 0,01% | 0,02% | 0,396797888 |
| PWY66-398         | TCA cycle III (animals)                                                                                           | 0,01% | 0,02% | 0,01% | 0,02% | 0,396797888 |
| PWY-7970          | benzimidazolyl adenosylcobamide biosynthesis from adenosylcobinamide-GDP                                          | 0,01% | 0,02% | 0,01% | 0,02% | 0,396797888 |
| PWY-7981          | &alpha;-dystroglycan glycosylation                                                                                | 0,13% | 0,09% | 0,14% | 0,07% | 0,399963084 |
| PWY-3821          | D-galactose detoxification                                                                                        | 0,00% | 0,00% | 0,00% | 0,01% | 0,400746527 |
| PWY-5148          | acyl-CoA hydrolysis                                                                                               | 0,01% | 0,00% | 0,01% | 0,00% | 0,400972036 |
| PWY-7452          | cyanidin dimalonylglucoside biosynthesis                                                                          | 0,01% | 0,00% | 0,02% | 0,00% | 0,402727538 |
| FASYN-INITIAL-PWY | superpathway of fatty acid biosynthesis initiation (E. coli)                                                      | 0,14% | 0,17% | 0,04% | 0,06% | 0,403636137 |
| PWY-6073          | alginate biosynthesis I (algal)                                                                                   | 0,01% | 0,00% | 0,01% | 0,00% | 0,403979518 |
| DARABCATK12-PWY   | D-arabinose degradation I                                                                                         | 0,16% | 0,09% | 0,17% | 0,06% | 0,40496583  |
| PWY-5328          | superpathway of L-methionine salvage and degradation                                                              | 0,19% | 0,12% | 0,17% | 0,05% | 0,405865904 |
| PWY-5170          | melamine degradation                                                                                              | 0,00% | 0,00% | 0,00% | 0,01% | 0,406941536 |
| PWY-7798          | protein <i>S</i>-nitrosylation and denitrosylation                                                                | 0,01% | 0,01% | 0,02% | 0,01% | 0,407938724 |
| PWY-7126          | ethene biosynthesis IV (engineered)                                                                               | 0,00% | 0,01% | 0,01% | 0,01% | 0,40875021  |
| PWY-5488          | 4-nitrophenol degradation II                                                                                      | 0,00% | 0,00% | 0,00% | 0,01% | 0,408923065 |
| PWY-7885          | phosphatidylinositol mannoside biosynthesis                                                                       | 0,00% | 0,00% | 0,00% | 0,01% | 0,408933117 |
| PWY-7277          | sphingolipid biosynthesis (mammals)                                                                               | 0,01% | 0,00% | 0,01% | 0,01% | 0,408993823 |
| GLCMANNANAUT-PWY  | superpathway of <i>N</i>-acetylglucosamine, <i>N</i>-acetylmannosamine and <i>N</i>-acetylglucosamine             | 0,01% | 0,01% | 0,01% | 0,01% | 0,409258312 |
| PWY30-450         | phosphatidylcholine biosynthesis I                                                                                | 0,00% | 0,01% | 0,00% | 0,01% | 0,411357421 |
| PWY-6938          | NADH repair (eukaryotes)                                                                                          | 0,00% | 0,00% | 0,00% | 0,01% | 0,411756705 |
| PWY-7178          | D-xylose degradation to ethylene glycol (engineered)                                                              | 0,07% | 0,05% | 0,04% | 0,03% | 0,411936092 |
| PWY-7467          | 2-acetamido-4-amino-2,4,6-trideoxy-&alpha;-D-galactosyl-diphospho-<i>trans</i>-octakis-<i>N</i>-acetylglucosamine | 0,20% | 0,15% | 0,14% | 0,07% | 0,412307743 |
| GLUAMCAT-PWY      | <i>N</i>-acetylglucosamine degradation I                                                                          | 0,08% | 0,07% | 0,01% | 0,03% | 0,412755259 |
| MANNIDEG-PWY      | mannitol degradation I                                                                                            | 0,00% | 0,00% | 0,00% | 0,01% | 0,413083012 |
| DARABITOLUTIL-PWY | D-arabitol degradation                                                                                            | 0,00% | 0,00% | 0,00% | 0,01% | 0,413083012 |
| PWY-6945          | cholesterol degradation to androstenedione I (cholesterol oxidase)                                                | 0,01% | 0,00% | 0,02% | 0,00% | 0,413540261 |
| PWY-7573          | GDP-mycosamine biosynthesis                                                                                       | 0,01% | 0,01% | 0,01% | 0,02% | 0,414702231 |
| PWY-5739          | GDP-D-perosamine biosynthesis                                                                                     | 0,01% | 0,01% | 0,01% | 0,02% | 0,414702231 |
| PWY-7900          | glycogen biosynthesis III (from &alpha;-maltose 1-phosphate)                                                      | 0,22% | 0,17% | 0,15% | 0,07% | 0,415939264 |
| PWY-5675          | nitrate reduction V (assimilatory)                                                                                | 0,02% | 0,02% | 0,02% | 0,02% | 0,416184229 |
| PWY-7295          | L-arabinose degradation IV                                                                                        | 0,02% | 0,02% | 0,02% | 0,02% | 0,416184229 |
| PWY-7294          | D-xylose degradation IV                                                                                           | 0,02% | 0,02% | 0,02% | 0,02% | 0,416184229 |

|              |                                                                                   |       |       |       |       |             |
|--------------|-----------------------------------------------------------------------------------|-------|-------|-------|-------|-------------|
| PWY-6760     | D-xylose degradation III                                                          | 0,02% | 0,02% | 0,02% | 0,02% | 0,416184229 |
| CODH-PWY     | reductive acetyl coenzyme A pathway I (homoacetogenic bacteria)                   | 0,00% | 0,00% | 0,00% | 0,01% | 0,416367517 |
| PWY-7356     | thiamine diphosphate salvage IV (yeast)                                           | 0,00% | 0,00% | 0,00% | 0,01% | 0,416367517 |
| PWY-5431     | aromatic compounds degradation via &beta;-ketoadipate                             | 0,00% | 0,00% | 0,00% | 0,01% | 0,416367517 |
| PWY-6957     | mandelate degradation to acetyl-CoA                                               | 0,00% | 0,00% | 0,00% | 0,01% | 0,416367517 |
| PWY-5417     | catechol degradation III (ortho-cleavage pathway)                                 | 0,00% | 0,00% | 0,00% | 0,01% | 0,416367517 |
| PWY66-391    | fatty acid &beta;-oxidation VI (mammalian peroxisome)                             | 0,12% | 0,09% | 0,11% | 0,04% | 0,417449902 |
| P461-PWY     | hexitol fermentation to lactate, formate, ethanol and acetate                     | 0,43% | 0,36% | 0,17% | 0,05% | 0,417621179 |
| PWY-7338     | 10-<i>trans</i>-heptadecenoyl-CoA degradation (reductase-dependent, yeast)        | 0,01% | 0,00% | 0,02% | 0,00% | 0,417727652 |
| PWY-5838     | superpathway of menaquinol-8 biosynthesis I                                       | 0,07% | 0,05% | 0,05% | 0,04% | 0,418101684 |
| PWY-7346     | UDP-&alpha;-D-glucuronate biosynthesis (from UDP-glucose)                         | 0,00% | 0,01% | 0,01% | 0,02% | 0,420186625 |
| PWY-5829     | geraniol and geranial biosynthesis                                                | 0,00% | 0,01% | 0,01% | 0,02% | 0,420186625 |
| PWY-6887     | kauralexin biosynthesis                                                           | 0,00% | 0,01% | 0,01% | 0,02% | 0,420186625 |
| PWY-5028     | L-histidine degradation II                                                        | 0,06% | 0,08% | 0,05% | 0,04% | 0,420466169 |
| HISDEG-PWY   | L-histidine degradation I                                                         | 0,06% | 0,08% | 0,05% | 0,04% | 0,420466169 |
| SERSYN-PWY   | L-serine biosynthesis I                                                           | 0,05% | 0,03% | 0,05% | 0,02% | 0,420836872 |
| PWY-6284     | superpathway of unsaturated fatty acids biosynthesis (<i>E. coli</i>)             | 0,13% | 0,17% | 0,05% | 0,11% | 0,421281629 |
| PWY-6700     | queuosine biosynthesis I (<i>de novo</i>)                                         | 0,27% | 0,21% | 0,16% | 0,06% | 0,423114721 |
| PWY-7517     | brassicicene C biosynthesis                                                       | 0,09% | 0,08% | 0,04% | 0,03% | 0,424099034 |
| PWY-7268     | NAD/NADP-NADH/NADPH cytosolic interconversion (yeast)                             | 0,01% | 0,01% | 0,01% | 0,01% | 0,426205651 |
| PWYQT-4477   | indole glucosinolate activation (intact plant cell)                               | 0,02% | 0,00% | 0,03% | 0,01% | 0,426960996 |
| PWY-6633     | caffeine degradation V (bacteria, via trimethylurate)                             | 0,01% | 0,02% | 0,02% | 0,03% | 0,427347285 |
| PWY-6890     | 4-amino-2-methyl-5-diphosphomethylpyrimidine biosynthesis I                       | 0,01% | 0,02% | 0,02% | 0,03% | 0,427347285 |
| PWY-7183     | pyrimidine nucleobases salvage I                                                  | 0,02% | 0,03% | 0,02% | 0,03% | 0,427565095 |
| NPGLUCAT-PWY | Entner-Doudoroff pathway II (non-phosphorylative)                                 | 0,02% | 0,04% | 0,03% | 0,03% | 0,429782682 |
| PWY-5067     | glycogen biosynthesis II (from UDP-D-Glucose)                                     | 0,01% | 0,00% | 0,03% | 0,01% | 0,429976037 |
| PWY-7193     | pyrimidine ribonucleosides salvage I                                              | 0,24% | 0,22% | 0,05% | 0,06% | 0,430614724 |
| PWY-5470     | palmitine biosynthesis                                                            | 0,04% | 0,03% | 0,02% | 0,02% | 0,430763738 |
| PWY-7097     | vanillin and vanillate degradation I                                              | 0,00% | 0,00% | 0,00% | 0,00% | 0,431358592 |
| PWY-7734     | quinoxaline-2-carboxylate biosynthesis                                            | 0,00% | 0,00% | 0,00% | 0,00% | 0,431358592 |
| PWY-8051     | anandamide biosynthesis I                                                         | 0,22% | 0,17% | 0,14% | 0,05% | 0,433402178 |
| PWY-3        | putrescine degradation V                                                          | 0,01% | 0,00% | 0,01% | 0,01% | 0,433563486 |
| PWY66-378    | androgen biosynthesis                                                             | 0,01% | 0,00% | 0,01% | 0,01% | 0,433563486 |
| PWY-7305     | superpathway of steroid hormone biosynthesis                                      | 0,01% | 0,00% | 0,01% | 0,01% | 0,433563486 |
| PWY-6057     | dimethyl sulfide degradation III (oxidation)                                      | 0,01% | 0,00% | 0,01% | 0,00% | 0,434254468 |
| PWY-7395     | D-galactosamine and <i>N</i>-acetyl-D-galactosamine degradation                   | 0,01% | 0,00% | 0,01% | 0,00% | 0,434254468 |
| PWY-7437     | protein <i>O</i>-[<i>N</i>-acetyl]-glucosylation                                  | 0,03% | 0,02% | 0,03% | 0,02% | 0,434675458 |
| PWY-6389     | pyruvate fermentation to (<i>S</i>)-acetoin                                       | 0,00% | 0,00% | 0,01% | 0,00% | 0,435046338 |
| PWY0-1295    | pyrimidine ribonucleosides degradation                                            | 0,00% | 0,00% | 0,00% | 0,01% | 0,439749932 |
| PWY-5374     | punicate biosynthesis                                                             | 0,00% | 0,00% | 0,00% | 0,01% | 0,439749932 |
| PWY-7967     | 5-methoxybenzimidazolyl adenosylcobamide biosynthesis from adenosylcobinamide-GDP | 0,00% | 0,00% | 0,00% | 0,01% | 0,439749932 |
| PWY-5375     | &alpha;-eleostearate biosynthesis                                                 | 0,00% | 0,00% | 0,00% | 0,01% | 0,439749932 |
| PWY-7975     | adenosylcobalamin biosynthesis from adenosylcobinamide-GDP II                     | 0,00% | 0,00% | 0,00% | 0,01% | 0,439749932 |
| PWY-8122     | mycofactocin biosynthesis                                                         | 0,02% | 0,01% | 0,03% | 0,01% | 0,439978816 |
| P261-PWY     | coenzyme M biosynthesis I                                                         | 0,03% | 0,02% | 0,02% | 0,02% | 0,44123355  |
| PWY-5084     | 2-oxoglutarate decarboxylation to succinyl-CoA                                    | 0,03% | 0,04% | 0,02% | 0,04% | 0,441534978 |

|                     |                                                                           |       |       |       |       |             |
|---------------------|---------------------------------------------------------------------------|-------|-------|-------|-------|-------------|
| PWY-5005            | biotin biosynthesis II                                                    | 0,02% | 0,03% | 0,02% | 0,02% | 0,44438035  |
| PWY-6574            | achromobactin biosynthesis                                                | 0,01% | 0,00% | 0,02% | 0,00% | 0,444586922 |
| PWY-6552            | caffeine degradation I (main, plants)                                     | 0,02% | 0,03% | 0,02% | 0,03% | 0,449663415 |
| PWY-5903            | bacillibactin biosynthesis                                                | 0,00% | 0,00% | 0,00% | 0,01% | 0,450004878 |
| PWY-6572            | chondroitin sulfate degradation I (bacterial)                             | 0,01% | 0,02% | 0,02% | 0,02% | 0,450819917 |
| PWY-881             | trehalose biosynthesis II                                                 | 0,01% | 0,00% | 0,01% | 0,01% | 0,451008898 |
| TRPKYNCAT-PWY       | L-tryptophan degradation IV (via indole-3-lactate)                        | 0,01% | 0,00% | 0,02% | 0,01% | 0,452060864 |
| PWY-6751            | superpathway of hydrogen production                                       | 0,03% | 0,04% | 0,02% | 0,03% | 0,45242688  |
| PWY-6763            | salicortin biosynthesis                                                   | 0,11% | 0,15% | 0,08% | 0,09% | 0,453874905 |
| PWY-7831            | ABH and Lewis epitopes biosynthesis from type 2 precursor disaccharide    | 0,00% | 0,01% | 0,01% | 0,01% | 0,455720444 |
| PWY-3781            | aerobic respiration I (cytochrome c)                                      | 0,05% | 0,03% | 0,05% | 0,02% | 0,455788519 |
| PWY-6724            | starch degradation II                                                     | 0,03% | 0,04% | 0,03% | 0,03% | 0,457628575 |
| P108-PWY            | pyruvate fermentation to propanoate I                                     | 0,02% | 0,03% | 0,03% | 0,02% | 0,458586782 |
| PWY-7616            | methanol oxidation to carbon dioxide                                      | 0,03% | 0,04% | 0,02% | 0,03% | 0,459152409 |
| PWY-7646            | dermatan sulfate degradation I (bacterial)                                | 0,01% | 0,01% | 0,01% | 0,01% | 0,459457738 |
| 1CMET2-PWY          | folate transformations III (<i>E. coli</i>)                               | 0,05% | 0,03% | 0,06% | 0,02% | 0,45949096  |
| PWY-7626            | bacilysin biosynthesis                                                    | 0,04% | 0,03% | 0,03% | 0,02% | 0,459518074 |
| PWY-5027            | phyloquinol biosynthesis                                                  | 0,01% | 0,01% | 0,01% | 0,01% | 0,459955392 |
| PWY-7054            | <i>N</i>-acetylglutaminyglutamine amide biosynthesis                      | 0,00% | 0,00% | 0,01% | 0,00% | 0,460074077 |
| PWY-7539            | 6-hydroxymethyl-dihydropterin diphosphate biosynthesis III (Chlamydia)    | 0,01% | 0,00% | 0,01% | 0,01% | 0,460306058 |
| PWY-5434            | (3-<i>E</i>)-4,8-dimethylnona-1,3,7-triene biosynthesis I                 | 0,09% | 0,07% | 0,09% | 0,03% | 0,46084581  |
| PWY-7569            | arginomycin biosynthesis                                                  | 0,14% | 0,12% | 0,08% | 0,05% | 0,461954568 |
| PWY0-1433           | tetrahydromonapterin biosynthesis                                         | 0,02% | 0,01% | 0,02% | 0,01% | 0,462174318 |
| PPGPPMET-PWY        | ppGpp metabolism                                                          | 0,19% | 0,22% | 0,05% | 0,07% | 0,462217295 |
| PWY-7647            | ulvan degradation                                                         | 0,04% | 0,02% | 0,07% | 0,03% | 0,462532733 |
| ORNARGDEG-PWY       | superpathway of L-arginine and L-ornithine degradation                    | 0,04% | 0,02% | 0,05% | 0,02% | 0,463863593 |
| TYRSYN              | L-tyrosine biosynthesis I                                                 | 0,07% | 0,05% | 0,06% | 0,04% | 0,464643769 |
| PWY-7205            | CMP phosphorylation                                                       | 0,06% | 0,08% | 0,05% | 0,04% | 0,465459274 |
| ARGININE-SYN4-PWY   | L-ornithine biosynthesis II                                               | 0,02% | 0,03% | 0,03% | 0,02% | 0,466195026 |
| PWY-6154            | autoinducer AI-2 biosynthesis II (<i>Vibrio</i>)                          | 0,00% | 0,00% | 0,01% | 0,00% | 0,466988003 |
| PWY-6003            | gramicidin S biosynthesis                                                 | 0,00% | 0,00% | 0,01% | 0,00% | 0,466988003 |
| PWY-5834            | CDP-tyvelose biosynthesis                                                 | 0,00% | 0,00% | 0,01% | 0,00% | 0,466988003 |
| NAD-BIOSYNTHESIS-II | NAD salvage pathway III (to nicotinamide riboside)                        | 0,01% | 0,00% | 0,02% | 0,00% | 0,468753813 |
| PWY-5485            | pyruvate fermentation to acetate IV                                       | 0,00% | 0,00% | 0,00% | 0,01% | 0,470558422 |
| PWY-5115            | GDP-L-galactose biosynthesis                                              | 0,01% | 0,02% | 0,01% | 0,02% | 0,471029231 |
| ARGDEG-V-PWY        | L-arginine degradation X (arginine monooxygenase pathway)                 | 0,09% | 0,08% | 0,03% | 0,03% | 0,471668004 |
| PWY0-522            | lipoate salvage I                                                         | 0,00% | 0,00% | 0,00% | 0,01% | 0,472681378 |
| TREDEGLOW-PWY       | trehalose degradation I (low osmolarity)                                  | 0,08% | 0,06% | 0,05% | 0,03% | 0,472697105 |
| LACTOSECAT-PWY      | lactose and galactose degradation I                                       | 0,02% | 0,04% | 0,03% | 0,04% | 0,4728719   |
| PWY-6322            | phosphinothricin tripeptide biosynthesis                                  | 0,01% | 0,01% | 0,01% | 0,02% | 0,473284608 |
| PWY-7759            | bacteriochlorophyll <i>c</i> biosynthesis                                 | 0,00% | 0,00% | 0,00% | 0,00% | 0,473469941 |
| PWY-7046            | 4-coumarate degradation (anaerobic)                                       | 0,00% | 0,00% | 0,00% | 0,00% | 0,473469941 |
| PWY-5736            | isopropylamine degradation                                                | 0,00% | 0,00% | 0,00% | 0,00% | 0,473469941 |
| PWY-5358            | tetrathionate reduction I (to thiosulfate)                                | 0,00% | 0,00% | 0,00% | 0,00% | 0,473469941 |
| ASPAASN-PWY         | superpathway of L-aspartate and L-asparagine biosynthesis                 | 0,28% | 0,26% | 0,07% | 0,06% | 0,474053618 |
| PWY-7377            | cob(II)yrinate <i>a,c</i>-diamide biosynthesis I (early cobalt insertion) | 0,12% | 0,15% | 0,07% | 0,05% | 0,474985934 |



|                         |                                                                                            |       |       |       |       |             |
|-------------------------|--------------------------------------------------------------------------------------------|-------|-------|-------|-------|-------------|
| PWY-6616                | sulfolactate degradation I                                                                 | 0,00% | 0,01% | 0,01% | 0,01% | 0,475710389 |
| BETSYN-PWY              | glycine betaine biosynthesis I (Gram-negative bacteria)                                    | 0,00% | 0,00% | 0,01% | 0,01% | 0,477242452 |
| PWY-6996                | daidzin and daidzein degradation                                                           | 0,00% | 0,01% | 0,00% | 0,01% | 0,478133017 |
| PWY-7813                | thiosulfate disproportionation III (quinone)                                               | 0,00% | 0,01% | 0,00% | 0,01% | 0,478699371 |
| HCAMHPDEG-PWY           | 3-phenylpropanoate and 3-(3-hydroxyphenyl)propanoate degradation to 2-hydroxypentadienoate | 0,01% | 0,00% | 0,02% | 0,01% | 0,479501097 |
| PWY-6690                | cinnamate and 3-hydroxycinnamate degradation to 2-hydroxypentadienoate                     | 0,01% | 0,00% | 0,02% | 0,01% | 0,479501097 |
| ARGDEG-IV-PWY           | L-arginine degradation VIII (arginine oxidase pathway)                                     | 0,08% | 0,06% | 0,01% | 0,05% | 0,480345451 |
| PWY-4922                | 6-methoxymellein biosynthesis                                                              | 0,00% | 0,00% | 0,01% | 0,00% | 0,480586826 |
| SUCSYN-PWY              | sucrose biosynthesis I (from photosynthesis)                                               | 0,00% | 0,00% | 0,01% | 0,00% | 0,480586826 |
| PWY-6758                | hydrogen production II                                                                     | 0,02% | 0,03% | 0,02% | 0,03% | 0,480765473 |
| PWY-6744                | hydrogen production I                                                                      | 0,02% | 0,03% | 0,02% | 0,03% | 0,480765473 |
| PWY-6466                | pyridoxal 5'-phosphate biosynthesis II                                                     | 0,02% | 0,02% | 0,01% | 0,02% | 0,481878499 |
| PWYG-321                | mycolate biosynthesis                                                                      | 0,05% | 0,03% | 0,07% | 0,01% | 0,481909307 |
| PWY-7715                | superpathway of trichothecene biosynthesis                                                 | 0,11% | 0,13% | 0,04% | 0,03% | 0,482841779 |
| ASPARAGINESYN-PWY       | L-asparagine biosynthesis II                                                               | 0,11% | 0,13% | 0,04% | 0,03% | 0,482841779 |
| PWY18C3-5               | &alpha;-tomatine degradation                                                               | 0,01% | 0,01% | 0,01% | 0,02% | 0,483134228 |
| PWY-6767                | 4,4'-diapolycopenedioate biosynthesis                                                      | 0,02% | 0,03% | 0,02% | 0,03% | 0,484968863 |
| PWY-6638                | sulfolactate degradation III                                                               | 0,01% | 0,00% | 0,02% | 0,01% | 0,485349112 |
| P421-PWY                | 4-nitrotoluene degradation I                                                               | 0,01% | 0,00% | 0,01% | 0,01% | 0,485438077 |
| CHOLINE-BETAINE-ANA-PWY | choline degradation I                                                                      | 0,01% | 0,00% | 0,01% | 0,01% | 0,485438077 |
| HOMOSERSYN-PWY          | L-homoserine biosynthesis                                                                  | 0,20% | 0,17% | 0,08% | 0,06% | 0,486390205 |
| PWY-5862                | superpathway of demethylmenaquinol-9 biosynthesis                                          | 0,04% | 0,03% | 0,03% | 0,03% | 0,486649789 |
| PWYQT-4450              | aliphatic glucosinolate biosynthesis, side chain elongation cycle                          | 0,03% | 0,03% | 0,04% | 0,02% | 0,48685223  |
| GALACT-GLUCUROCAT-PWY   | superpathway of hexuronide and hexuronate degradation                                      | 0,29% | 0,33% | 0,11% | 0,12% | 0,487043891 |
| PWY-6445                | fenchol biosynthesis II                                                                    | 0,11% | 0,13% | 0,08% | 0,05% | 0,487128615 |
| PWY-7208                | superpathway of pyrimidine nucleobases salvage                                             | 0,25% | 0,29% | 0,10% | 0,10% | 0,487228529 |
| PWY0-1577               | hydrogen to dimethyl sulfoxide electron transfer                                           | 0,03% | 0,03% | 0,02% | 0,02% | 0,488392244 |
| PWY66-409               | superpathway of purine nucleotide salvage                                                  | 0,08% | 0,06% | 0,05% | 0,03% | 0,488397451 |
| PWY-8026                | sterol biosynthesis (methylotrophs)                                                        | 0,15% | 0,17% | 0,05% | 0,05% | 0,488646608 |
| PWYQT-4427              | sulfoquinovosyl diacylglycerol biosynthesis                                                | 0,00% | 0,00% | 0,01% | 0,00% | 0,48900379  |
| PWY-7954                | tabtoxinine-&beta;-lactam biosynthesis                                                     | 0,01% | 0,01% | 0,02% | 0,01% | 0,490723995 |
| PWY-7167                | choline degradation III                                                                    | 0,02% | 0,01% | 0,03% | 0,01% | 0,491328487 |
| PWY-6944                | androstenedione degradation                                                                | 0,02% | 0,03% | 0,02% | 0,03% | 0,491398685 |
| PWY-7317                | superpathway of dTDP-glucose-derived O-antigen building blocks biosynthesis                | 0,06% | 0,07% | 0,03% | 0,03% | 0,49228703  |
| PWY-6842                | glutathione-mediated detoxification II                                                     | 0,03% | 0,01% | 0,03% | 0,01% | 0,493434665 |
| PWY-882                 | L-ascorbate biosynthesis I (L-galactose pathway)                                           | 0,04% | 0,03% | 0,04% | 0,02% | 0,49394587  |
| PWY-7285                | methylwyosine biosynthesis                                                                 | 0,02% | 0,00% | 0,03% | 0,01% | 0,494696326 |
| PWY-6087                | 4-chlorocatechol degradation                                                               | 0,02% | 0,00% | 0,03% | 0,01% | 0,494696326 |
| GLUT-REDOX-PWY          | glutathione-glutaredoxin redox reactions                                                   | 0,01% | 0,00% | 0,01% | 0,00% | 0,495576024 |
| PWY-8018                | itaconate biosynthesis II                                                                  | 0,01% | 0,01% | 0,01% | 0,01% | 0,497639216 |
| PWY-101                 | photosynthesis light reactions                                                             | 0,00% | 0,00% | 0,01% | 0,00% | 0,497747772 |
| PWY-7731                | superpathway of photosynthetic hydrogen production                                         | 0,00% | 0,00% | 0,01% | 0,00% | 0,497747772 |
| PWY-7274                | D-cycloserine biosynthesis                                                                 | 0,01% | 0,01% | 0,02% | 0,01% | 0,498043341 |
| PWY-7867                | coenzyme B/coenzyme M regeneration IV (H<sub>2</sub>-dependent)                            | 0,03% | 0,02% | 0,04% | 0,02% | 0,501746333 |
| PWY-7814                | dTDP-L-daunosamine biosynthesis                                                            | 0,02% | 0,02% | 0,03% | 0,02% | 0,501888859 |
| PWY-5347                | superpathway of L-methionine biosynthesis (transsulfuration)                               | 0,31% | 0,34% | 0,11% | 0,08% | 0,502786032 |

|                         |                                                                               |       |       |       |       |             |
|-------------------------|-------------------------------------------------------------------------------|-------|-------|-------|-------|-------------|
| PWY-7210                | pyrimidine deoxyribonucleotides biosynthesis from CTP                         | 0,08% | 0,09% | 0,06% | 0,03% | 0,504559628 |
| PWY-7644                | heparin degradation                                                           | 0,07% | 0,09% | 0,05% | 0,06% | 0,505377958 |
| P124-PWY                | Bifidobacterium shunt                                                         | 0,01% | 0,00% | 0,02% | 0,00% | 0,507127852 |
| PWY-6786                | detoxification of reactive carbonyls in chloroplasts                          | 0,01% | 0,00% | 0,02% | 0,00% | 0,507127852 |
| PWY-5433                | superpathway of lipoxygenase                                                  | 0,01% | 0,00% | 0,02% | 0,00% | 0,507127852 |
| BIOTIN-BIOSYNTHESIS-PWY | biotin biosynthesis I                                                         | 0,09% | 0,08% | 0,02% | 0,04% | 0,50887218  |
| PWY-6143                | CMP-pseudamate biosynthesis                                                   | 0,10% | 0,08% | 0,07% | 0,04% | 0,50890943  |
| PWY-3121                | linamarin degradation                                                         | 0,08% | 0,10% | 0,06% | 0,06% | 0,509445552 |
| MGLDLCTANA-PWY          | methylglyoxal degradation VI                                                  | 0,04% | 0,03% | 0,04% | 0,01% | 0,50978849  |
| P122-PWY                | heterolactic fermentation                                                     | 0,10% | 0,11% | 0,04% | 0,04% | 0,510073998 |
| PWY-6558                | heparan sulfate biosynthesis (late stages)                                    | 0,00% | 0,00% | 0,00% | 0,01% | 0,513144685 |
| PWY-8130                | 5'-deoxyadenosine degradation I                                               | 0,01% | 0,01% | 0,01% | 0,02% | 0,51320276  |
| PWY-8132                | <i>S</i>-methyl-5-thio-<i>α</i>-D-ribose 1-phosphate degradation III          | 0,01% | 0,01% | 0,01% | 0,02% | 0,51320276  |
| POLYAMINSYN3-PWY        | superpathway of polyamine biosynthesis II                                     | 0,07% | 0,09% | 0,04% | 0,04% | 0,514165046 |
| NAGLIPASYN-PWY          | lipid IV<sub>A</sub> biosynthesis (E. coli)                                   | 0,08% | 0,06% | 0,09% | 0,03% | 0,514543239 |
| PWY-6163                | chorismate biosynthesis from 3-dehydroquinate                                 | 0,01% | 0,00% | 0,01% | 0,01% | 0,516055178 |
| PWY-6675                | sulfur oxidation IV (intracellular sulfur)                                    | 0,00% | 0,00% | 0,00% | 0,01% | 0,516202901 |
| PWY0-1602               | D-gulosides conversion to D-glucosides                                        | 0,01% | 0,01% | 0,01% | 0,01% | 0,517321351 |
| PWY-7440                | dTDP-<i>β</i>-L-4-<i>epi</i>-vancosamine biosynthesis                         | 0,00% | 0,01% | 0,01% | 0,01% | 0,519627609 |
| PWY-6728                | methylaspartate cycle                                                         | 0,19% | 0,17% | 0,08% | 0,05% | 0,520719783 |
| PWY-7376                | cob(II)yrinate <i>a,c</i>-diamide biosynthesis II (late cobalt incorporation) | 0,06% | 0,08% | 0,07% | 0,03% | 0,524214728 |
| PWY-5283                | L-lysine degradation V                                                        | 0,01% | 0,01% | 0,01% | 0,01% | 0,524709572 |
| PWY-6349                | CDP-archaeol biosynthesis                                                     | 0,12% | 0,08% | 0,12% | 0,04% | 0,525334646 |
| PWY-7621                | autoinducer CAI-1 biosynthesis                                                | 0,12% | 0,08% | 0,12% | 0,04% | 0,525334646 |
| PWY-5883                | ephedrine biosynthesis                                                        | 0,03% | 0,04% | 0,02% | 0,03% | 0,525868533 |
| PWY-6455                | vancomycin resistance II                                                      | 0,02% | 0,02% | 0,03% | 0,02% | 0,525879368 |
| PWY-5403                | betaxanthin biosynthesis (via dopamine)                                       | 0,02% | 0,01% | 0,03% | 0,02% | 0,527206122 |
| PWY-6462                | peptidoglycan cross-bridge biosynthesis III (Enterococcus faecalis)           | 0,04% | 0,05% | 0,02% | 0,04% | 0,527289531 |
| PWY-5196                | factor 430 biosynthesis                                                       | 0,02% | 0,01% | 0,03% | 0,01% | 0,527569195 |
| PWY0-1306               | L-galactonate degradation                                                     | 0,01% | 0,00% | 0,01% | 0,01% | 0,528379167 |
| PWY-7020                | superpathway of butirocin biosynthesis                                        | 0,76% | 0,81% | 0,08% | 0,15% | 0,528865651 |
| PWY-5668                | cardiolipin biosynthesis I                                                    | 0,06% | 0,04% | 0,05% | 0,04% | 0,529659744 |
| HISHP-PWY               | L-histidine degradation VI                                                    | 0,02% | 0,01% | 0,03% | 0,01% | 0,529661964 |
| PWY-4061                | glutathione-mediated detoxification I                                         | 0,00% | 0,01% | 0,01% | 0,01% | 0,530425242 |
| PWY-7974                | cobalamin salvage (eukaryotic)                                                | 0,00% | 0,00% | 0,00% | 0,01% | 0,530430973 |
| PHOSLIPSYN-PWY          | superpathway of phospholipid biosynthesis I (bacteria)                        | 0,13% | 0,12% | 0,07% | 0,04% | 0,530551799 |
| P401-PWY                | cyanide degradation                                                           | 0,24% | 0,21% | 0,06% | 0,07% | 0,530984212 |
| PWY-8096                | 5-methoxybenzimidazole biosynthesis (anaerobic)                               | 0,02% | 0,01% | 0,03% | 0,01% | 0,531295985 |
| PWY-7585                | docosaehaenoate biosynthesis II (bacteria)                                    | 0,06% | 0,08% | 0,03% | 0,09% | 0,53155212  |
| PWY-7919                | protein <i>N</i>-glycosylation processing phase (plants and animals)          | 0,03% | 0,02% | 0,03% | 0,03% | 0,532051999 |
| PWY-7889                | tRNA-uridine 2-thiolation (mammalian mitochondria)                            | 0,06% | 0,07% | 0,05% | 0,04% | 0,532361412 |
| PRPP-PWY                | superpathway of histidine, purine, and pyrimidine biosynthesis                | 1,36% | 1,42% | 0,05% | 0,21% | 0,532634191 |
| PWY-8045                | cylindrospermopsin biosynthesis                                               | 0,00% | 0,01% | 0,01% | 0,01% | 0,533294197 |
| PWY-2221                | Entner-Doudoroff pathway III (semi-phosphorylative)                           | 0,03% | 0,04% | 0,03% | 0,03% | 0,533427897 |
| PWY-6610                | adenine salvage                                                               | 0,16% | 0,13% | 0,06% | 0,08% | 0,535264552 |
| ETOH-ACETYLCOA-ANA-PWY  | ethanol degradation I                                                         | 0,07% | 0,06% | 0,05% | 0,02% | 0,535669069 |

|                      |                                                                                   |       |       |       |       |             |
|----------------------|-----------------------------------------------------------------------------------|-------|-------|-------|-------|-------------|
| PWY-7852             | 6-hydroxymethyl-dihydropterin diphosphate biosynthesis IV (Plasmodium)            | 0,00% | 0,00% | 0,00% | 0,00% | 0,536074567 |
| PWY-7442             | drosoplerin and aurodrosoplerin biosynthesis                                      | 0,00% | 0,00% | 0,00% | 0,00% | 0,536074567 |
| PWY-7179-1           | purine deoxyribonucleosides degradation II                                        | 0,00% | 0,00% | 0,00% | 0,00% | 0,536074567 |
| PWY-8064             | sodorifen biosynthesis                                                            | 0,00% | 0,00% | 0,00% | 0,00% | 0,536074567 |
| PWY-6872             | retinoate biosynthesis I                                                          | 0,00% | 0,00% | 0,00% | 0,00% | 0,536074567 |
| PWY-1042             | glycolysis IV (plant cytosol)                                                     | 0,00% | 0,00% | 0,00% | 0,00% | 0,536074567 |
| PWY-7726             | (4Z,7Z,10Z,13Z,16Z)-docosapentaenoate biosynthesis (6-desaturase)                 | 0,00% | 0,00% | 0,00% | 0,00% | 0,536074567 |
| PWY-2582             | brassinosteroid biosynthesis II                                                   | 0,00% | 0,00% | 0,00% | 0,00% | 0,536074567 |
| PWY-699              | brassinosteroid biosynthesis I                                                    | 0,00% | 0,00% | 0,00% | 0,00% | 0,536074567 |
| PWY-6834             | spermidine biosynthesis III                                                       | 0,00% | 0,00% | 0,00% | 0,00% | 0,536074567 |
| PWY-6544             | superpathway of C28 brassinosteroid biosynthesis                                  | 0,00% | 0,00% | 0,00% | 0,00% | 0,536074567 |
| PWY-5129             | sphingolipid biosynthesis (plants)                                                | 0,00% | 0,00% | 0,00% | 0,00% | 0,536074567 |
| GLUDEG-I-PWY         | GABA shunt                                                                        | 0,00% | 0,00% | 0,00% | 0,00% | 0,536074567 |
| PWY-6113             | superpathway of mycolate biosynthesis                                             | 0,00% | 0,00% | 0,00% | 0,00% | 0,536074567 |
| PWY-6008             | baruol biosynthesis                                                               | 0,00% | 0,00% | 0,00% | 0,00% | 0,536074567 |
| PWY-5867             | <i>t</i>-anethole biosynthesis                                                    | 0,00% | 0,00% | 0,00% | 0,00% | 0,536074567 |
| TOLSULFDEG-PWY       | 4-toluenesulfonate degradation I                                                  | 0,00% | 0,00% | 0,00% | 0,00% | 0,536074567 |
| PWY-7289             | L-cysteine biosynthesis V (mycobacteria)                                          | 0,00% | 0,00% | 0,00% | 0,00% | 0,536074567 |
| PWY-5872             | ubiquinol-10 biosynthesis (eukaryotic)                                            | 0,00% | 0,00% | 0,00% | 0,00% | 0,536074567 |
| PWY-8036             | chaxamycin biosynthesis                                                           | 0,00% | 0,00% | 0,00% | 0,00% | 0,536074567 |
| PWY-7998             | menaquinol-4 biosynthesis II                                                      | 0,00% | 0,00% | 0,00% | 0,00% | 0,536074567 |
| PWY-5083             | NAD/NADH phosphorylation and dephosphorylation                                    | 0,00% | 0,00% | 0,00% | 0,00% | 0,536074567 |
| PWY-5389             | 3-methylthiopropionate biosynthesis                                               | 0,00% | 0,00% | 0,00% | 0,00% | 0,536074567 |
| PWY-1881             | formate oxidation to CO<sub>2</sub>                                               | 0,00% | 0,00% | 0,00% | 0,00% | 0,536074567 |
| PWY-6420             | pyrroloquinoline quinone biosynthesis                                             | 0,00% | 0,00% | 0,00% | 0,00% | 0,536074567 |
| PWY-5653             | NAD biosynthesis from 2-amino-3-carboxymuconate semialdehyde                      | 0,00% | 0,00% | 0,00% | 0,00% | 0,536074567 |
| PWY-4302             | aerobic respiration III (alternative oxidase pathway)                             | 0,00% | 0,00% | 0,00% | 0,00% | 0,536074567 |
| PWY-7624             | nystatin biosynthesis                                                             | 0,00% | 0,00% | 0,00% | 0,00% | 0,536074567 |
| PWY-7251             | pentacyclic triterpene biosynthesis                                               | 0,00% | 0,00% | 0,00% | 0,00% | 0,536074567 |
| PWY-6116             | mannosylfructose biosynthesis                                                     | 0,00% | 0,00% | 0,00% | 0,00% | 0,536074567 |
| PWY-7069             | oleanolate biosynthesis                                                           | 0,00% | 0,00% | 0,00% | 0,00% | 0,536074567 |
| PWY-5692             | allantoin degradation to glyoxylate II                                            | 0,00% | 0,00% | 0,00% | 0,00% | 0,536074567 |
| SPHINGOLIPID-SYN-PWY | sphingolipid biosynthesis (yeast)                                                 | 0,00% | 0,00% | 0,00% | 0,00% | 0,536074567 |
| PWY0-1264            | biotin-carboxyl carrier protein assembly                                          | 0,00% | 0,00% | 0,00% | 0,00% | 0,536074567 |
| PWY-5279             | sulfite oxidation II                                                              | 0,00% | 0,00% | 0,00% | 0,00% | 0,536074567 |
| PWY-5349             | esculetin biosynthesis                                                            | 0,00% | 0,00% | 0,00% | 0,00% | 0,536074567 |
| PWY-7693             | guadinomine B biosynthesis                                                        | 0,00% | 0,00% | 0,00% | 0,00% | 0,536074567 |
| PWY-7496             | linuron degradation                                                               | 0,00% | 0,00% | 0,00% | 0,00% | 0,536074567 |
| PWY-7428             | 2-chloroacrylate degradation II                                                   | 0,00% | 0,00% | 0,00% | 0,00% | 0,536074567 |
| PWY-7425             | 2-chloroacrylate degradation I                                                    | 0,00% | 0,00% | 0,00% | 0,00% | 0,536074567 |
| PWY-5525             | D-glucuronate degradation I                                                       | 0,00% | 0,00% | 0,00% | 0,00% | 0,536074567 |
| PWY-7786             | D-threitol degradation                                                            | 0,00% | 0,00% | 0,00% | 0,00% | 0,536074567 |
| P561-PWY             | proline betaine degradation I                                                     | 0,00% | 0,00% | 0,00% | 0,00% | 0,536074567 |
| PWY-7851             | coenzyme A biosynthesis II (eukaryotic)                                           | 0,00% | 0,00% | 0,00% | 0,00% | 0,536074567 |
| PWY-6148             | tetrahydromethanopterin biosynthesis                                              | 0,00% | 0,00% | 0,00% | 0,00% | 0,536074567 |
| PWY-7159             | 3,8-divinyl-chlorophyllide <i>a</i> biosynthesis III (aerobic, light independent) | 0,00% | 0,00% | 0,00% | 0,00% | 0,536074567 |

|               |                                                                                        |       |       |       |       |             |
|---------------|----------------------------------------------------------------------------------------|-------|-------|-------|-------|-------------|
| PWY-7238      | sucrose biosynthesis II                                                                | 0,00% | 0,00% | 0,00% | 0,00% | 0,536074567 |
| PWY-741       | <l>p</l>-cymene degradation to <l>p</l>-cumate                                         | 0,00% | 0,00% | 0,00% | 0,00% | 0,536074567 |
| PWY-6997      | furfural degradation                                                                   | 0,00% | 0,00% | 0,00% | 0,00% | 0,536074567 |
| PWY-3801      | sucrose degradation II (sucrose synthase)                                              | 0,00% | 0,00% | 0,00% | 0,00% | 0,536074567 |
| PWY-8110      | L-dopa degradation II (bacterial)                                                      | 0,00% | 0,00% | 0,00% | 0,00% | 0,536074567 |
| PWY-5152      | leucodelphinidin biosynthesis                                                          | 0,00% | 0,00% | 0,00% | 0,00% | 0,536074567 |
| PWY-5794      | malonate degradation I (biotin-independent)                                            | 0,00% | 0,00% | 0,00% | 0,00% | 0,536074567 |
| PWY-6922      | L-<i>N<sup>&delta;</sup></i>-acetylornithine biosynthesis                              | 0,00% | 0,00% | 0,00% | 0,00% | 0,536074567 |
| PWY-7784      | reductive acetyl coenzyme A pathway II (autotrophic methanogens)                       | 0,00% | 0,00% | 0,00% | 0,00% | 0,536074567 |
| PWY-6039      | chlorogenic acid biosynthesis I                                                        | 0,00% | 0,00% | 0,00% | 0,00% | 0,536074567 |
| PWY-6475      | <i>trans</i>-lycopene biosynthesis II (oxygenic phototrophs and green sulfur bacteria) | 0,00% | 0,00% | 0,00% | 0,00% | 0,536074567 |
| HEMESYN2-PWY  | heme <i>b</i> biosynthesis II (oxygen-independent)                                     | 0,00% | 0,00% | 0,00% | 0,00% | 0,536074567 |
| PWY-6054      | dimethylsulfoniopropanoate biosynthesis I (Wollastonia)                                | 0,00% | 0,00% | 0,00% | 0,00% | 0,536074567 |
| PWY-7706      | dapdiamides biosynthesis                                                               | 0,00% | 0,00% | 0,00% | 0,00% | 0,536074567 |
| PWY-6174      | mevalonate pathway II (haloarchaea)                                                    | 0,00% | 0,00% | 0,00% | 0,00% | 0,536074567 |
| TYRFUMCAT-PWY | L-tyrosine degradation I                                                               | 0,00% | 0,00% | 0,00% | 0,00% | 0,536074567 |
| PWY-5951      | (<i>R,R</i>)-butanediol biosynthesis                                                   | 0,00% | 0,00% | 0,00% | 0,00% | 0,536074567 |
| PWY-6390      | (<i>S,S</i>)-butanediol biosynthesis                                                   | 0,00% | 0,00% | 0,00% | 0,00% | 0,536074567 |
| PWY-6391      | <i>meso</i>-butanediol biosynthesis I                                                  | 0,00% | 0,00% | 0,00% | 0,00% | 0,536074567 |
| PWY-6392      | <i>meso</i>-butanediol biosynthesis II                                                 | 0,00% | 0,00% | 0,00% | 0,00% | 0,536074567 |
| PWY-5647      | 2-nitrobenzoate degradation I                                                          | 0,00% | 0,00% | 0,00% | 0,00% | 0,536074567 |
| PWY-7828      | cyclobis-(1&rarr;6)-&alpha;-nigerosyl degradation                                      | 0,00% | 0,00% | 0,00% | 0,00% | 0,536074567 |
| PWY-7540      | aflatrem biosynthesis                                                                  | 0,00% | 0,00% | 0,00% | 0,00% | 0,536074567 |
| PWY-5703      | urea degradation I                                                                     | 0,00% | 0,00% | 0,00% | 0,00% | 0,536074567 |
| PWY-7391      | isoprene biosynthesis II (engineered)                                                  | 0,00% | 0,00% | 0,00% | 0,00% | 0,536074567 |
| PWY-5163      | <l>p</l>-cumate degradation to 2-hydroxypentadienoate                                  | 0,00% | 0,00% | 0,00% | 0,00% | 0,536074567 |
| PWY-5273      | <i>p</i>-cumate degradation                                                            | 0,00% | 0,00% | 0,00% | 0,00% | 0,536074567 |
| PWY-6146      | <i>Methanobacterium thermoautotrophicum</i> biosynthetic metabolism                    | 0,00% | 0,00% | 0,00% | 0,00% | 0,536074567 |
| PWY-7710      | FeMo cofactor biosynthesis                                                             | 0,00% | 0,00% | 0,00% | 0,00% | 0,536074567 |
| PWY-6056      | dimethylsulfoniopropanoate degradation II (cleavage)                                   | 0,00% | 0,00% | 0,00% | 0,00% | 0,536074567 |
| PWY-5278      | sulfite oxidation III                                                                  | 0,00% | 0,00% | 0,00% | 0,00% | 0,536074567 |
| PWY-7968      | 5-methylbenzimidazolyl adenosylcobamide biosynthesis from adenosylcobinamide-GDP       | 0,00% | 0,00% | 0,00% | 0,00% | 0,536074567 |
| PWY-7881      | virginiae butanolide type &gamma;-butyrolactones biosynthesis                          | 0,00% | 0,00% | 0,00% | 0,00% | 0,536074567 |
| PWY-7938      | isorenieratene biosynthesis I (actinobacteria)                                         | 0,00% | 0,00% | 0,00% | 0,00% | 0,536074567 |
| PWY-7497      | 3&beta;-hydroxysesquiterpene lactone biosynthesis                                      | 0,00% | 0,00% | 0,00% | 0,00% | 0,536074567 |
| PWY-6920      | 6-gingerol analog biosynthesis (engineered)                                            | 0,00% | 0,00% | 0,00% | 0,00% | 0,536074567 |
| PWY-8104      | yangonin biosynthesis                                                                  | 0,00% | 0,00% | 0,00% | 0,00% | 0,536074567 |
| PWY-6374      | vibriobactin biosynthesis                                                              | 0,00% | 0,00% | 0,00% | 0,00% | 0,536074567 |
| PWY-8094      | superpathway of kavalactone biosynthesis                                               | 0,00% | 0,00% | 0,00% | 0,00% | 0,536074567 |
| PWY-1263      | taurine degradation I                                                                  | 0,00% | 0,00% | 0,00% | 0,00% | 0,536074567 |
| PWY66-373     | sucrose degradation V (sucrose &alpha;-glucosidase)                                    | 0,00% | 0,00% | 0,00% | 0,00% | 0,536074567 |
| PWY-6837      | fatty acid &beta;-oxidation V (unsaturated, odd number, di-isomerase-dependent)        | 0,00% | 0,00% | 0,00% | 0,00% | 0,536074567 |
| PWY-5726      | deethylsimazine degradation                                                            | 0,00% | 0,00% | 0,00% | 0,00% | 0,536074567 |
| PWY-6084      | 3,5-dichlorocatechol degradation                                                       | 0,00% | 0,00% | 0,00% | 0,00% | 0,536074567 |
| PWY-5199      | factor 420 polyglutamylatation                                                         | 0,00% | 0,00% | 0,00% | 0,00% | 0,536074567 |
| PWY-6210      | 2-aminophenol degradation                                                              | 0,00% | 0,00% | 0,00% | 0,00% | 0,536074567 |

|                    |                                                                         |       |       |       |       |             |
|--------------------|-------------------------------------------------------------------------|-------|-------|-------|-------|-------------|
| PWY-2781           | <i>cis</i>-zeatin biosynthesis                                          | 0,00% | 0,00% | 0,00% | 0,01% | 0,536074567 |
| PWY-8027           | parkeol biosynthesis                                                    | 0,00% | 0,00% | 0,00% | 0,01% | 0,536074567 |
| PWY-6138           | CMP-<i>N</i>-acetylneuraminate biosynthesis I (eukaryotes)              | 0,00% | 0,00% | 0,00% | 0,01% | 0,536074567 |
| PWY-8008           | staphyloferrin B biosynthesis                                           | 0,00% | 0,00% | 0,00% | 0,01% | 0,536074567 |
| COA-PWY-1          | superpathway of coenzyme A biosynthesis III (mammals)                   | 0,00% | 0,00% | 0,00% | 0,01% | 0,536074567 |
| PWY-7441           | polymyxin A biosynthesis                                                | 0,00% | 0,00% | 0,00% | 0,01% | 0,536074567 |
| PHESYN             | L-phenylalanine biosynthesis I                                          | 0,00% | 0,00% | 0,00% | 0,01% | 0,536074567 |
| PWY-7469           | gentisate degradation II                                                | 0,00% | 0,00% | 0,00% | 0,01% | 0,536074567 |
| GLUTAMATE-SYN2-PWY | L-glutamate biosynthesis II                                             | 0,00% | 0,00% | 0,00% | 0,01% | 0,536074567 |
| PWY-842            | starch degradation I                                                    | 0,00% | 0,00% | 0,00% | 0,01% | 0,536074567 |
| PWY-8001           | felinine and 3-methyl-3-sulfanylbutan-1-ol biosynthesis                 | 0,00% | 0,00% | 0,00% | 0,01% | 0,536074567 |
| PWY-8029           | limonene degradation IV (anaerobic)                                     | 0,00% | 0,00% | 0,00% | 0,01% | 0,536074567 |
| PWY-7136           | &beta; myrcene degradation                                              | 0,00% | 0,00% | 0,00% | 0,01% | 0,536074567 |
| PWY-6933           | seleno-amino acid detoxification and volatilization III                 | 0,00% | 0,00% | 0,00% | 0,01% | 0,536074567 |
| PWY-7154           | ergosterol biosynthesis II                                              | 0,00% | 0,00% | 0,00% | 0,01% | 0,536074567 |
| PWY-7564           | bacimethrin and bacimethrin pyrophosphate biosynthesis                  | 0,00% | 0,00% | 0,00% | 0,01% | 0,536074567 |
| PWY-8112           | factor 420 biosynthesis I (archaea)                                     | 0,00% | 0,00% | 0,00% | 0,01% | 0,536074567 |
| PWY66-368          | ketolysis                                                               | 0,00% | 0,00% | 0,00% | 0,01% | 0,536074567 |
| PWY-6534           | phenylethylamine degradation II                                         | 0,00% | 0,00% | 0,00% | 0,01% | 0,536074567 |
| PWY-5329           | L-cysteine degradation III                                              | 0,00% | 0,00% | 0,00% | 0,01% | 0,536074567 |
| PWY-5394           | betalamic acid biosynthesis                                             | 0,00% | 0,00% | 0,00% | 0,01% | 0,536074567 |
| PWY-7788           | erythritol degradation II                                               | 0,00% | 0,00% | 0,00% | 0,01% | 0,536074567 |
| PWY-6418           | 4-hydroxycoumarin and dicoumarol biosynthesis                           | 0,00% | 0,00% | 0,00% | 0,01% | 0,536074567 |
| PWY-7524           | mevalonate pathway III (Thermoplasma)                                   | 0,00% | 0,00% | 0,00% | 0,01% | 0,536074567 |
| PWY-6642           | (<i>R</i>)-cysteate degradation                                         | 0,00% | 0,00% | 0,00% | 0,01% | 0,536074567 |
| PWY-762            | phospholipid desaturation                                               | 0,00% | 0,00% | 0,00% | 0,01% | 0,536074567 |
| PWY-5956           | sterigmatocystin biosynthesis                                           | 0,00% | 0,00% | 0,00% | 0,01% | 0,536074567 |
| PWY1G-170          | formaldehyde oxidation III (mycothiol-dependent)                        | 0,00% | 0,00% | 0,00% | 0,01% | 0,536090884 |
| PWY-5861           | superpathway of demethylmenaquinol-8 biosynthesis I                     | 0,06% | 0,05% | 0,04% | 0,03% | 0,5388095   |
| PWY0-501           | lipoate biosynthesis and incorporation I                                | 0,06% | 0,05% | 0,04% | 0,02% | 0,539273315 |
| PWY0-1590          | NADH to hydrogen peroxide electron transfer                             | 0,07% | 0,05% | 0,05% | 0,04% | 0,540298922 |
| PWY-7462           | 3,3'-disulfanediyldipropionate degradation                              | 0,05% | 0,03% | 0,07% | 0,03% | 0,541321674 |
| PWY-5968           | cinnamate esters biosynthesis                                           | 0,04% | 0,03% | 0,03% | 0,03% | 0,541636382 |
| PWY-5360           | superpathway of tetrathionate reduction (<i>Salmonella typhimurium</i>) | 0,01% | 0,01% | 0,01% | 0,01% | 0,541701973 |
| PWY-7197           | pyrimidine deoxyribonucleotide phosphorylation                          | 0,06% | 0,07% | 0,05% | 0,04% | 0,54289139  |
| PWY-5344           | L-homocysteine biosynthesis                                             | 0,11% | 0,13% | 0,07% | 0,04% | 0,544546332 |
| PWY-7944           | bacterioruberin biosynthesis                                            | 0,01% | 0,02% | 0,02% | 0,02% | 0,544980984 |
| PWY-8089           | D-apiose degradation I                                                  | 0,03% | 0,02% | 0,03% | 0,02% | 0,54504419  |
| P185-PWY           | formaldehyde assimilation III (dihydroxyacetone cycle)                  | 0,04% | 0,03% | 0,03% | 0,03% | 0,546134334 |
| PWY-5372           | carbon tetrachloride degradation II                                     | 0,01% | 0,00% | 0,02% | 0,01% | 0,546456247 |
| PWY-7335           | UDP-<i>N</i>-acetyl-&alpha;-D-mannosaminouronate biosynthesis           | 0,09% | 0,07% | 0,04% | 0,05% | 0,547553271 |
| BGALACT-PWY        | lactose degradation III                                                 | 0,21% | 0,23% | 0,06% | 0,09% | 0,547915651 |
| PWY-4361           | <i>S</i>-methyl-5-thio-&alpha;-D-ribose 1-phosphate degradation I       | 0,03% | 0,04% | 0,02% | 0,04% | 0,549733903 |
| PWY0-1315          | L-lactaldehyde degradation (anaerobic)                                  | 0,06% | 0,05% | 0,03% | 0,04% | 0,54976511  |
| PWY-5088           | L-glutamate degradation VIII (to propanoate)                            | 0,33% | 0,35% | 0,09% | 0,06% | 0,550138263 |
| PWY0-1545          | cardiolipin biosynthesis III                                            | 0,01% | 0,00% | 0,02% | 0,01% | 0,550235522 |



|                   |                                                                       |       |       |       |       |             |
|-------------------|-----------------------------------------------------------------------|-------|-------|-------|-------|-------------|
| PWY-6886          | 1-butanol autotrophic biosynthesis (engineered)                       | 0,29% | 0,26% | 0,08% | 0,08% | 0,550379981 |
| PWY-6613          | tetrahydrofolate salvage from 5,10-methenyltetrahydrofolate           | 0,16% | 0,13% | 0,13% | 0,06% | 0,55085489  |
| PWY-7456          | &beta;- (1,4)-mannan degradation                                      | 0,18% | 0,14% | 0,14% | 0,07% | 0,551298726 |
| PWY-7886          | cell-surface glycoconjugate-linked phosphocholine biosynthesis        | 0,03% | 0,04% | 0,03% | 0,02% | 0,551738313 |
| PWY-6949          | DIBOA-glucoside biosynthesis                                          | 0,03% | 0,02% | 0,03% | 0,03% | 0,552057703 |
| KDO-LIPASYN-PWY   | (Kdo) <sub>2</sub> -lipid A biosynthesis I (E. coli)                  | 0,01% | 0,01% | 0,01% | 0,02% | 0,552178527 |
| PWY-6153          | autoinducer AI-2 biosynthesis I                                       | 0,05% | 0,04% | 0,04% | 0,04% | 0,552377986 |
| PWY-5155          | &beta;-alanine biosynthesis III                                       | 0,01% | 0,00% | 0,01% | 0,01% | 0,552629941 |
| PWY-6938-1        | NADH repair (prokaryotes)                                             | 0,01% | 0,01% | 0,02% | 0,01% | 0,55263503  |
| PWY-8136          | NADPH repair (prokaryotes)                                            | 0,01% | 0,01% | 0,02% | 0,01% | 0,55263503  |
| PWY-7024          | superpathway of the 3-hydroxypropanoate cycle                         | 0,16% | 0,19% | 0,11% | 0,06% | 0,554093292 |
| PWY0-381          | glycerol and glycerophosphodiester degradation                        | 0,08% | 0,09% | 0,02% | 0,04% | 0,554793549 |
| PWY-8106          | queuosine biosynthesis III (queuosine salvage)                        | 0,25% | 0,20% | 0,15% | 0,06% | 0,555239712 |
| PWY-7667          | apicidin biosynthesis                                                 | 0,02% | 0,01% | 0,02% | 0,01% | 0,555439631 |
| PWY-7226          | guanosine deoxyribonucleotides <i>de novo</i> biosynthesis I          | 0,10% | 0,12% | 0,08% | 0,04% | 0,55711981  |
| PWY-7674          | CMP-8-amino-3,8-dideoxy-D- <i>l</i> -manno-octulosonate biosynthesis  | 0,07% | 0,08% | 0,01% | 0,04% | 0,557903146 |
| PWY-6657          | polyhydroxydecanoate biosynthesis                                     | 0,00% | 0,00% | 0,00% | 0,01% | 0,557956516 |
| PWY-6422          | D-arginine degradation                                                | 0,07% | 0,05% | 0,05% | 0,03% | 0,559413003 |
| PWY-4985          | mimosine biosynthesis                                                 | 0,11% | 0,12% | 0,04% | 0,05% | 0,559700669 |
| PWY-6024          | isovitexin glycosides biosynthesis                                    | 0,06% | 0,07% | 0,02% | 0,04% | 0,560217162 |
| PWY-6307          | L-tryptophan degradation X (mammalian, via tryptamine)                | 0,00% | 0,01% | 0,01% | 0,01% | 0,561765564 |
| DENOVOPURINE2-PWY | superpathway of purine nucleotides <i>de novo</i> biosynthesis II     | 0,66% | 0,70% | 0,07% | 0,16% | 0,562123136 |
| PWY-5147          | oleate biosynthesis I (plants)                                        | 0,01% | 0,02% | 0,01% | 0,02% | 0,563376156 |
| PWY-2622          | trehalose biosynthesis IV                                             | 0,02% | 0,01% | 0,03% | 0,02% | 0,564404525 |
| PWY-7007          | methyl ketone biosynthesis (engineered)                               | 0,01% | 0,00% | 0,02% | 0,00% | 0,56660421  |
| PWY-5386          | methylglyoxal degradation I                                           | 0,01% | 0,01% | 0,01% | 0,02% | 0,567901378 |
| PWY0-1477         | ethanolamine utilization                                              | 0,29% | 0,27% | 0,03% | 0,11% | 0,568214163 |
| PWY-6545          | pyrimidine deoxyribonucleotides <i>de novo</i> biosynthesis III       | 0,16% | 0,14% | 0,09% | 0,06% | 0,568242123 |
| PWY-7842          | UDP-yelosamine biosynthesis                                           | 0,03% | 0,02% | 0,04% | 0,02% | 0,568470593 |
| PWY-7620          | naphthalene degradation (anaerobic)                                   | 0,01% | 0,01% | 0,02% | 0,01% | 0,570074656 |
| PWY-7446          | sulfoquinovose degradation I                                          | 0,01% | 0,01% | 0,02% | 0,01% | 0,570534682 |
| PWY-5100          | pyruvate fermentation to acetate and lactate II                       | 0,21% | 0,23% | 0,08% | 0,08% | 0,572218236 |
| PWY-7354          | aclacinomycin biosynthesis                                            | 0,08% | 0,09% | 0,02% | 0,04% | 0,57355837  |
| PWY-7286          | 7-(3-amino-3-carboxypropyl)-wyosine biosynthesis                      | 0,16% | 0,18% | 0,11% | 0,06% | 0,574173163 |
| DETOX1-PWY        | superoxide radicals degradation                                       | 0,01% | 0,02% | 0,01% | 0,01% | 0,574975073 |
| PWY-7775          | propane degradation II                                                | 0,03% | 0,04% | 0,03% | 0,02% | 0,575234104 |
| PWY-6627          | salinosporamide A biosynthesis                                        | 0,02% | 0,01% | 0,04% | 0,02% | 0,575393764 |
| PWY0-881          | superpathway of fatty acid biosynthesis I (E. coli)                   | 0,23% | 0,26% | 0,07% | 0,12% | 0,577849724 |
| P142-PWY          | pyruvate fermentation to acetate I                                    | 0,19% | 0,21% | 0,07% | 0,07% | 0,578992026 |
| PWY-7184          | pyrimidine deoxyribonucleotides <i>de novo</i> biosynthesis I         | 0,19% | 0,22% | 0,12% | 0,06% | 0,580228477 |
| P4-PWY            | superpathway of L-lysine, L-threonine and L-methionine biosynthesis I | 0,46% | 0,49% | 0,10% | 0,09% | 0,580497156 |
| PWY-5480          | pyruvate fermentation to ethanol I                                    | 0,20% | 0,23% | 0,10% | 0,09% | 0,580619035 |
| PWY-5744          | glyoxylate assimilation                                               | 0,05% | 0,06% | 0,03% | 0,03% | 0,580845097 |
| P181-PWY          | nicotine degradation I (pyridine pathway)                             | 0,04% | 0,05% | 0,04% | 0,04% | 0,581456964 |
| PWY-3001          | superpathway of L-isoleucine biosynthesis I                           | 0,53% | 0,49% | 0,16% | 0,11% | 0,582814368 |
| PWY-6620          | guanine and guanosine salvage                                         | 0,00% | 0,00% | 0,01% | 0,00% | 0,584162793 |

|                       |                                                                                       |       |       |       |       |             |
|-----------------------|---------------------------------------------------------------------------------------|-------|-------|-------|-------|-------------|
| PWY-7325              | salvigenin biosynthesis                                                               | 0,04% | 0,04% | 0,02% | 0,03% | 0,584575621 |
| PWY-6305              | superpathway of putrescine biosynthesis                                               | 0,02% | 0,03% | 0,03% | 0,03% | 0,585837493 |
| PWY-5641              | 2-nitrotoluene degradation                                                            | 0,02% | 0,02% | 0,02% | 0,02% | 0,586643534 |
| PWY-5642              | 2,4-dinitrotoluene degradation                                                        | 0,28% | 0,25% | 0,12% | 0,04% | 0,587290287 |
| HYDROXYPRODEG-PWY     | <i>trans</i>-4-hydroxy-L-proline degradation I                                        | 0,00% | 0,01% | 0,01% | 0,01% | 0,588587905 |
| PWY-7874              | L-threonate degradation                                                               | 0,02% | 0,02% | 0,03% | 0,02% | 0,589153465 |
| PWY-7018              | paromomycin biosynthesis                                                              | 0,05% | 0,04% | 0,07% | 0,03% | 0,59053795  |
| PWY-5705              | allantoin degradation to glyoxylate III                                               | 0,02% | 0,01% | 0,03% | 0,01% | 0,590988845 |
| THRESYN-PWY           | superpathway of L-threonine biosynthesis                                              | 0,20% | 0,22% | 0,08% | 0,09% | 0,591004015 |
| PWY-5529              | superpathway of bacteriochlorophyll <i>a</i> biosynthesis                             | 0,05% | 0,04% | 0,04% | 0,03% | 0,592664221 |
| PWY-6797              | 6-hydroxymethyl-dihydropterin diphosphate biosynthesis II (<i>Methanocaldococcus</i>) | 0,15% | 0,13% | 0,06% | 0,05% | 0,592680696 |
| PWY-6243              | bergamotene biosynthesis I                                                            | 0,00% | 0,00% | 0,01% | 0,00% | 0,593953699 |
| PWY-5893              | tridecaprenyl diphosphate biosynthesis                                                | 0,06% | 0,06% | 0,02% | 0,03% | 0,594172227 |
| PWY-6661              | 4-hydroxy-2(1<i>H</i>)-quinolone biosynthesis                                         | 0,06% | 0,06% | 0,02% | 0,03% | 0,594172227 |
| PWY-6901              | superpathway of glucose and xylose degradation                                        | 0,07% | 0,06% | 0,06% | 0,03% | 0,594387156 |
| PWY-7090              | UDP-2,3-diacetamido-2,3-dideoxy-&alpha;-D-mannuronate biosynthesis                    | 0,02% | 0,02% | 0,03% | 0,02% | 0,594690226 |
| PWY-6118              | glycerol-3-phosphate shuttle                                                          | 0,00% | 0,00% | 0,00% | 0,01% | 0,596001834 |
| PWY-8013              | UDP-<i>N</i>-acetyl-D-galactosamine biosynthesis III                                  | 0,00% | 0,01% | 0,01% | 0,01% | 0,596406919 |
| PWY-361               | phenylpropanoid biosynthesis                                                          | 0,00% | 0,01% | 0,01% | 0,01% | 0,596406919 |
| PWY66-162             | ethanol degradation IV                                                                | 0,05% | 0,04% | 0,04% | 0,02% | 0,597508481 |
| PWY-5747              | 2-methylcitrate cycle II                                                              | 0,02% | 0,01% | 0,03% | 0,01% | 0,59768432  |
| PWY-7971              | adenosylcobinamide-GDP salvage from cobinamide I                                      | 0,07% | 0,08% | 0,01% | 0,04% | 0,598627861 |
| GLUCARGALACTSUPER-PWY | superpathway of D-glucarate and D-galactarate degradation                             | 0,05% | 0,06% | 0,04% | 0,03% | 0,599638551 |
| PWY-6873              | long chain fatty acid ester synthesis (engineered)                                    | 0,02% | 0,02% | 0,03% | 0,02% | 0,600086098 |
| LACTOSEUTIL-PWY       | lactose degradation II                                                                | 0,02% | 0,03% | 0,03% | 0,02% | 0,603567548 |
| PWY-7396              | butanol and isobutanol biosynthesis (engineered)                                      | 0,02% | 0,03% | 0,03% | 0,02% | 0,604415091 |
| PWY-6998              | CDP-D-arabitol biosynthesis                                                           | 0,00% | 0,01% | 0,01% | 0,01% | 0,605268888 |
| PWY-6707              | gallate biosynthesis                                                                  | 0,01% | 0,01% | 0,01% | 0,01% | 0,606603867 |
| PWY-6308              | L-cysteine biosynthesis II (tRNA-dependent)                                           | 0,00% | 0,01% | 0,01% | 0,01% | 0,609157157 |
| PENTOSE-P-PWY         | pentose phosphate pathway                                                             | 0,18% | 0,17% | 0,07% | 0,04% | 0,609923564 |
| PWY-7698              | 2,5-xlenol and 3,5-xlenol degradation                                                 | 0,00% | 0,00% | 0,00% | 0,01% | 0,610237531 |
| PWY-6753              | <i>S</i>-methyl-5'-thioadenosine degradation III                                      | 0,00% | 0,00% | 0,01% | 0,00% | 0,61097896  |
| PWY-7182              | linalool biosynthesis I                                                               | 0,09% | 0,11% | 0,07% | 0,05% | 0,61264604  |
| PWY-8125              | mevalonate pathway IV (archaea)                                                       | 0,06% | 0,07% | 0,03% | 0,04% | 0,613245603 |
| PWY-5062              | superpathway of nicotinate degradation                                                | 0,07% | 0,08% | 0,04% | 0,05% | 0,615656422 |
| PWY-5481              | pyruvate fermentation to (<i>S</i>)-lactate                                           | 0,02% | 0,03% | 0,02% | 0,02% | 0,616139018 |
| PWY-8139              | CDP-6-deoxy-D-gulose biosynthesis                                                     | 0,01% | 0,01% | 0,01% | 0,01% | 0,617176082 |
| MANNCAT-PWY           | D-mannose degradation                                                                 | 0,02% | 0,01% | 0,03% | 0,01% | 0,617322504 |
| PWY-5971              | palmitate biosynthesis II (bacteria and plant cytoplasm)                              | 0,16% | 0,18% | 0,04% | 0,11% | 0,619148595 |
| PWY-5697              | allantoin degradation to ureidoglycolate I (urea producing)                           | 0,04% | 0,06% | 0,03% | 0,07% | 0,619449945 |
| PWY-5665              | vanillin biosynthesis I                                                               | 0,01% | 0,01% | 0,01% | 0,01% | 0,620690275 |
| PWY-6192              | 3,4-dichlorotoluene degradation                                                       | 0,09% | 0,10% | 0,05% | 0,06% | 0,621161998 |
| PWY490-3              | nitrate reduction VI (assimilatory)                                                   | 0,03% | 0,04% | 0,03% | 0,04% | 0,621235669 |
| PWY-7935              | spongiadioxin C biosynthesis                                                          | 0,15% | 0,17% | 0,07% | 0,06% | 0,62200985  |
| PWY-6863              | pyruvate fermentation to hexanol (engineered)                                         | 0,12% | 0,15% | 0,08% | 0,09% | 0,622043642 |
| PWY-7194              | pyrimidine nucleobases salvage II                                                     | 0,03% | 0,03% | 0,03% | 0,03% | 0,62363899  |

|                   |                                                                         |       |       |       |       |             |
|-------------------|-------------------------------------------------------------------------|-------|-------|-------|-------|-------------|
| PWY-8101          | arsenate detoxification III (thioredoxin)                               | 0,00% | 0,00% | 0,01% | 0,00% | 0,623964816 |
| PWY-2661          | trehalose biosynthesis V                                                | 0,01% | 0,01% | 0,02% | 0,01% | 0,625383025 |
| PWY-7931          | brominated pyrroles biosynthesis                                        | 0,05% | 0,04% | 0,03% | 0,03% | 0,626663882 |
| PWY0-1479         | tRNA processing                                                         | 0,00% | 0,00% | 0,00% | 0,01% | 0,629389071 |
| PWY-5181          | toluene degradation III (aerobic) (via <i>p</i> -cresol)                | 0,00% | 0,00% | 0,00% | 0,01% | 0,629389071 |
| PWY-7703          | 2,4-xylene degradation to protocatechuate                               | 0,00% | 0,00% | 0,00% | 0,01% | 0,629389071 |
| PWY-7700          | 4-methylphenol degradation to protocatechuate                           | 0,00% | 0,00% | 0,00% | 0,01% | 0,629389071 |
| PWY66-161         | ethanol degradation III                                                 | 0,08% | 0,07% | 0,06% | 0,04% | 0,629575939 |
| PWY-7432          | L-phenylalanine biosynthesis III (cytosolic, plants)                    | 0,02% | 0,01% | 0,04% | 0,02% | 0,63034825  |
| PWY-6268          | adenosylcobalamin salvage from cobalamin                                | 0,03% | 0,03% | 0,02% | 0,02% | 0,634920035 |
| GLUCARDEG-PWY     | <i>D</i> -glucarate degradation I                                       | 0,05% | 0,05% | 0,04% | 0,03% | 0,635009358 |
| PWY-5918          | superpathway of heme <i>b</i> biosynthesis from glutamate               | 0,14% | 0,12% | 0,04% | 0,05% | 0,636978857 |
| PWY-8121          | 2-deoxy-D-glucose 6-phosphate degradation                               | 0,13% | 0,10% | 0,12% | 0,04% | 0,637479363 |
| PWY-7248          | pectin degradation II                                                   | 0,08% | 0,09% | 0,05% | 0,04% | 0,637496385 |
| PWY-8099          | tetrahydropteridine recycling                                           | 0,01% | 0,01% | 0,01% | 0,01% | 0,638966749 |
| PWY-7397          | naringenin biosynthesis (engineered)                                    | 0,01% | 0,01% | 0,01% | 0,01% | 0,638966749 |
| PWY-6451          | 3-carene biosynthesis                                                   | 0,12% | 0,10% | 0,05% | 0,04% | 0,639118134 |
| PWY-5830          | CDP-ascarylose biosynthesis                                             | 0,00% | 0,01% | 0,01% | 0,01% | 0,640478325 |
| PWY0-1471         | uracil degradation III                                                  | 0,02% | 0,02% | 0,02% | 0,01% | 0,643104592 |
| PWY-7270          | L-methionine salvage cycle II (plants)                                  | 0,02% | 0,02% | 0,02% | 0,02% | 0,644029179 |
| PWY-5408          | 9-lipoxygenase and 9-hydroperoxide lyase pathway                        | 0,02% | 0,02% | 0,02% | 0,03% | 0,645919427 |
| PWY-5076          | L-leucine degradation III                                               | 0,02% | 0,02% | 0,02% | 0,03% | 0,645919427 |
| PWY-5078          | L-isoleucine degradation II                                             | 0,02% | 0,02% | 0,02% | 0,03% | 0,645919427 |
| PWY-5839          | menaquinol-7 biosynthesis                                               | 0,01% | 0,01% | 0,01% | 0,01% | 0,646117812 |
| PWY-5852          | demethylmenaquinol-8 biosynthesis I                                     | 0,01% | 0,01% | 0,01% | 0,01% | 0,646117812 |
| PWY-7055          | daphnetin modification                                                  | 0,01% | 0,01% | 0,02% | 0,01% | 0,646554778 |
| PWY-7290          | <i>Escherichia coli</i> serotype O86 <i>O</i> -antigen biosynthesis     | 0,03% | 0,03% | 0,03% | 0,02% | 0,646561573 |
| PWY-6408          | pyochelin biosynthesis                                                  | 0,00% | 0,00% | 0,01% | 0,01% | 0,646701928 |
| PWY-6385          | peptidoglycan biosynthesis III (mycobacteria)                           | 0,33% | 0,34% | 0,09% | 0,05% | 0,647384174 |
| ETHYL-PWY         | ethene biosynthesis I (plants)                                          | 0,01% | 0,01% | 0,01% | 0,01% | 0,647990963 |
| PWY-6032          | digitoxigenin biosynthesis                                              | 0,02% | 0,01% | 0,03% | 0,02% | 0,65026897  |
| PWY-7040          | violacein biosynthesis                                                  | 0,02% | 0,01% | 0,03% | 0,02% | 0,65026897  |
| PWY-2161          | folate polyglutamylation                                                | 0,10% | 0,11% | 0,06% | 0,05% | 0,650740877 |
| ARO-PWY           | chorismate biosynthesis I                                               | 0,14% | 0,13% | 0,04% | 0,05% | 0,650932745 |
| PWY-5915          | phycoerythrobilin biosynthesis I                                        | 0,07% | 0,06% | 0,05% | 0,03% | 0,651824536 |
| PWY-5287          | sanguinarine and macarpine biosynthesis                                 | 0,01% | 0,02% | 0,02% | 0,02% | 0,654689569 |
| PWY0-1303         | aminopropylcadaverine biosynthesis                                      | 0,01% | 0,01% | 0,01% | 0,01% | 0,654892552 |
| N2FIX-PWY         | nitrogen fixation I (ferredoxin)                                        | 0,00% | 0,00% | 0,01% | 0,01% | 0,656400494 |
| GLYCOGENSYNTH-PWY | glycogen biosynthesis I (from ADP-D-Glucose)                            | 0,05% | 0,06% | 0,03% | 0,03% | 0,659299277 |
| PWY-7195          | pyrimidine ribonucleosides salvage III                                  | 0,01% | 0,01% | 0,02% | 0,01% | 0,659413218 |
| PWY0-1309         | chitobiose degradation                                                  | 0,11% | 0,10% | 0,06% | 0,03% | 0,661343007 |
| PWY-7574          | propanoyl-CoA degradation II                                            | 0,13% | 0,15% | 0,06% | 0,07% | 0,661545321 |
| PWY-3641          | L-carnitine degradation III                                             | 0,00% | 0,00% | 0,00% | 0,01% | 0,66206787  |
| PWY-6516          | superpathway of microbial D-galacturonate and D-glucuronate degradation | 0,42% | 0,46% | 0,13% | 0,15% | 0,662170804 |
| PWY-6132          | lanosterol biosynthesis                                                 | 0,00% | 0,00% | 0,00% | 0,01% | 0,66250523  |
| PWY-6698          | oxalate degradation V                                                   | 0,33% | 0,34% | 0,09% | 0,06% | 0,662742722 |

|                  |                                                                         |       |       |       |       |             |
|------------------|-------------------------------------------------------------------------|-------|-------|-------|-------|-------------|
| PWY-8044         | cyclohexane-1-carboxyl-CoA biosynthesis                                 | 0,00% | 0,00% | 0,00% | 0,01% | 0,662809641 |
| METHFORM-PWY     | methyl-coenzyme M reduction to methane                                  | 0,01% | 0,00% | 0,01% | 0,00% | 0,664553743 |
| P141-PWY         | atrazine degradation I (aerobic)                                        | 0,02% | 0,03% | 0,03% | 0,03% | 0,665317067 |
| PWY-7572         | lolitrem B biosynthesis                                                 | 0,10% | 0,11% | 0,08% | 0,06% | 0,668320067 |
| PWY-7721         | methyl phomopsenoate biosynthesis                                       | 0,01% | 0,00% | 0,01% | 0,01% | 0,671795691 |
| PWY-6293         | superpathway of L-cysteine biosynthesis (fungi)                         | 0,01% | 0,00% | 0,01% | 0,01% | 0,671795691 |
| PWY-7686         | L-malate degradation II                                                 | 0,17% | 0,18% | 0,04% | 0,06% | 0,672236489 |
| PWY0-321         | phenylacetate degradation I (aerobic)                                   | 0,08% | 0,07% | 0,07% | 0,04% | 0,672853783 |
| P121-PWY         | adenine and adenosine salvage I                                         | 0,09% | 0,11% | 0,09% | 0,06% | 0,673070449 |
| GLNSYN-PWY       | L-glutamine biosynthesis I                                              | 0,03% | 0,04% | 0,03% | 0,04% | 0,673954049 |
| PWY-6964         | ammonia assimilation cycle II                                           | 0,03% | 0,04% | 0,03% | 0,04% | 0,673954049 |
| PWY18C3-18       | labdenediol and sclareol biosynthesis                                   | 0,10% | 0,09% | 0,04% | 0,04% | 0,675133673 |
| PWY-5526         | bacteriochlorophyll <i>a</i> biosynthesis                               | 0,08% | 0,08% | 0,04% | 0,03% | 0,676983279 |
| PWY-6817         | $\lambda$ -carrageenan degradation                                      | 0,05% | 0,04% | 0,06% | 0,02% | 0,677006974 |
| PWY66-430        | myristate biosynthesis (mitochondria)                                   | 0,02% | 0,02% | 0,02% | 0,02% | 0,677233441 |
| PWY66-3          | cholesterol biosynthesis II (via 24,25-dihydrolanosterol)               | 0,00% | 0,01% | 0,01% | 0,02% | 0,678713522 |
| PWY-2722         | trehalose degradation IV                                                | 0,00% | 0,00% | 0,01% | 0,00% | 0,680284861 |
| PWY-2721         | trehalose degradation III                                               | 0,00% | 0,00% | 0,01% | 0,00% | 0,680284861 |
| PWY-7196         | superpathway of pyrimidine ribonucleosides salvage                      | 0,32% | 0,35% | 0,14% | 0,13% | 0,680361118 |
| SUCUTIL-PWY      | sucrose degradation I (sucrose phosphotransferase)                      | 0,03% | 0,02% | 0,03% | 0,03% | 0,68093878  |
| SAM-PWY          | S-adenosyl-L-methionine biosynthesis                                    | 0,15% | 0,13% | 0,10% | 0,03% | 0,682970745 |
| TEICHOICACID-PWY | poly(glycerol phosphate) wall teichoic acid biosynthesis                | 0,00% | 0,00% | 0,00% | 0,01% | 0,684294863 |
| PWY-8055         | palmitoyl ethanolamide biosynthesis                                     | 0,00% | 0,00% | 0,00% | 0,01% | 0,684294863 |
| PWY-7250         | [2Fe-2S] iron-sulfur cluster biosynthesis                               | 0,14% | 0,16% | 0,10% | 0,06% | 0,686052394 |
| PWY-5110         | trigonelline biosynthesis                                               | 0,00% | 0,00% | 0,01% | 0,00% | 0,68706486  |
| PWY0-1277        | 3-phenylpropanoate and 3-(3-hydroxyphenyl)propanoate degradation        | 0,01% | 0,01% | 0,03% | 0,01% | 0,688857567 |
| PWY-5509         | adenosylcobalamin biosynthesis from adenosylcobinamide-GDP I            | 0,01% | 0,01% | 0,01% | 0,02% | 0,690081559 |
| PWY-6000         | $\gamma$ -linolenate biosynthesis II (animals)                          | 0,01% | 0,01% | 0,01% | 0,02% | 0,690081559 |
| PWY-5972         | stearate biosynthesis I (animals)                                       | 0,01% | 0,01% | 0,01% | 0,02% | 0,690081559 |
| PWY-7592         | arachidonate biosynthesis III (6-desaturase, mammals)                   | 0,01% | 0,01% | 0,01% | 0,02% | 0,690081559 |
| PWY-6478         | GDP-D- <i>glycero</i> - $\alpha$ -D- <i>manno</i> -heptose biosynthesis | 0,01% | 0,01% | 0,01% | 0,01% | 0,690912921 |
| PWY-6672         | <i>cis</i> -genanyl-CoA degradation                                     | 0,01% | 0,01% | 0,01% | 0,01% | 0,690942495 |
| PWY-7212         | baicalein metabolism                                                    | 0,19% | 0,18% | 0,08% | 0,04% | 0,691526007 |
| PWY-1121         | suberin monomers biosynthesis                                           | 0,01% | 0,01% | 0,01% | 0,01% | 0,692536576 |
| PWY-7527         | L-methionine salvage cycle III                                          | 0,18% | 0,16% | 0,11% | 0,03% | 0,696980719 |
| PWY-8014         | L-phenylalanine degradation VI (Stickland reaction)                     | 0,07% | 0,08% | 0,01% | 0,03% | 0,697210501 |
| PWY-8016         | L-tyrosine degradation V (Stickland reaction)                           | 0,07% | 0,08% | 0,01% | 0,03% | 0,697210501 |
| PWY-8017         | L-tryptophan degradation XIII (Stickland reaction)                      | 0,07% | 0,08% | 0,01% | 0,03% | 0,697210501 |
| PWY-5659         | GDP-mannose biosynthesis                                                | 0,00% | 0,00% | 0,01% | 0,01% | 0,698465673 |
| PWY-6718         | sulfoacetaldehyde degradation III                                       | 0,01% | 0,01% | 0,01% | 0,01% | 0,69912034  |
| PWY-6104         | 3-chlorotoluene degradation II                                          | 0,70% | 0,72% | 0,10% | 0,11% | 0,699939968 |
| PWY-I9           | L-cysteine biosynthesis VI (from L-methionine)                          | 0,21% | 0,20% | 0,09% | 0,07% | 0,700067031 |
| PWY-5669         | phosphatidylserine and phosphatidylethanolamine biosynthesis I          | 0,00% | 0,00% | 0,00% | 0,01% | 0,703987136 |
| P203-PWY         | sulfur disproportionation I (anaerobic)                                 | 0,00% | 0,00% | 0,01% | 0,01% | 0,704384288 |
| PWY-5629         | isopenicillin N biosynthesis                                            | 0,02% | 0,01% | 0,04% | 0,02% | 0,704584202 |
| PWY-7821         | tunicamycin biosynthesis                                                | 0,01% | 0,01% | 0,02% | 0,01% | 0,706177835 |

|                     |                                                                          |       |       |       |       |             |
|---------------------|--------------------------------------------------------------------------|-------|-------|-------|-------|-------------|
| PWY-5400            | amaranthin biosynthesis                                                  | 0,00% | 0,00% | 0,00% | 0,00% | 0,708204796 |
| PWY-5640            | nitrobenzene degradation II                                              | 0,04% | 0,04% | 0,03% | 0,03% | 0,70885731  |
| PWY-7071            | steviol glucoside biosynthesis (rebaudioside A biosynthesis)             | 0,12% | 0,13% | 0,08% | 0,05% | 0,708898265 |
| PWY-7862            | D-altritol and galactitol degradation                                    | 0,00% | 0,01% | 0,01% | 0,01% | 0,709232668 |
| PWY-7770            | indolmycin biosynthesis                                                  | 0,07% | 0,06% | 0,06% | 0,04% | 0,713012335 |
| PWY-7345            | superpathway of anaerobic sucrose degradation                            | 0,02% | 0,01% | 0,02% | 0,02% | 0,713086111 |
| P381-PWY            | adenosylcobalamin biosynthesis II (aerobic)                              | 0,16% | 0,18% | 0,10% | 0,05% | 0,714140586 |
| PWY-7581            | <i>N</i>-acetylneuraminate and <i>N</i>-acetylmannosamine degradation II | 0,01% | 0,01% | 0,01% | 0,01% | 0,714318302 |
| GLYSYN-THR-PWY      | glycine biosynthesis IV                                                  | 0,02% | 0,02% | 0,03% | 0,02% | 0,714771692 |
| PWY-5785            | di-<i>trans</i>-poly-<i>cis</i>-undecaprenyl phosphate biosynthesis      | 0,01% | 0,01% | 0,01% | 0,01% | 0,716558782 |
| PWY-7198            | pyrimidine deoxyribonucleotides <i>de novo</i> biosynthesis IV           | 0,06% | 0,06% | 0,04% | 0,02% | 0,717614847 |
| PWY-7371            | 1,4-dihydroxy-6-naphthoate biosynthesis II                               | 0,00% | 0,00% | 0,01% | 0,01% | 0,723462747 |
| PWY-7373            | superpathway of demethylmenaquinol-6 biosynthesis II                     | 0,00% | 0,00% | 0,01% | 0,01% | 0,723462747 |
| PWY-7992            | superpathway of menaquinol-8 biosynthesis III                            | 0,00% | 0,00% | 0,01% | 0,01% | 0,723462747 |
| PWY-5926            | afrormosin conjugates interconversion                                    | 0,02% | 0,02% | 0,02% | 0,01% | 0,725406798 |
| PWY-7742            | phenolphthiocerol biosynthesis                                           | 0,02% | 0,02% | 0,02% | 0,01% | 0,725406798 |
| PWY-1186            | L-homomethionine biosynthesis                                            | 0,04% | 0,04% | 0,04% | 0,02% | 0,72576659  |
| GALACTITOLCAT-PWY   | galactitol degradation                                                   | 0,13% | 0,12% | 0,06% | 0,05% | 0,726546985 |
| PWY-5796            | malonate decarboxylase activation                                        | 0,05% | 0,06% | 0,03% | 0,04% | 0,7275636   |
| PWY-6883            | pyruvate fermentation to butanol II (engineered)                         | 0,11% | 0,13% | 0,07% | 0,08% | 0,730703376 |
| PWY-7093            | vicianin bioactivation                                                   | 0,02% | 0,02% | 0,02% | 0,03% | 0,730995566 |
| PWY-7847            | heme degradation VI                                                      | 0,01% | 0,01% | 0,01% | 0,02% | 0,732601858 |
| GLYCOL-GLYOXDEG-PWY | superpathway of glycol metabolism and degradation                        | 0,35% | 0,34% | 0,09% | 0,06% | 0,734764174 |
| PWY-7755            | iso-bile acids biosynthesis I                                            | 0,00% | 0,00% | 0,01% | 0,01% | 0,735223489 |
| PWY-6630            | superpathway of L-tyrosine biosynthesis                                  | 0,16% | 0,15% | 0,02% | 0,04% | 0,735356377 |
| GLUCUROCAT-PWY      | superpathway of &beta;-D-glucuronosides degradation                      | 0,23% | 0,25% | 0,10% | 0,09% | 0,737734503 |
| PWY-5943            | &beta;-carotene biosynthesis                                             | 0,10% | 0,11% | 0,06% | 0,04% | 0,739076854 |
| PWY-5107            | phytol salvage pathway                                                   | 0,11% | 0,12% | 0,05% | 0,04% | 0,741591685 |
| PWY-7745            | p-HBAD biosynthesis                                                      | 0,00% | 0,00% | 0,01% | 0,01% | 0,743863603 |
| PWY-7743            | dimycocerosyl triglycosyl phenolphthiocerol biosynthesis                 | 0,00% | 0,00% | 0,01% | 0,01% | 0,743863603 |
| PWY-6634            | 3-sulfopropanediol degradation                                           | 0,01% | 0,00% | 0,01% | 0,01% | 0,745497428 |
| REDCITCYC           | TCA cycle VI (Helicobacter)                                              | 0,05% | 0,04% | 0,04% | 0,02% | 0,745760331 |
| TRNA-CHARGING-PWY   | tRNA charging                                                            | 1,84% | 1,89% | 0,39% | 0,28% | 0,745972136 |
| PWY-7610            | GDP-6-deoxy-D-<i>altro</i>-heptose biosynthesis                          | 0,10% | 0,12% | 0,08% | 0,06% | 0,747713899 |
| PWY-5482            | pyruvate fermentation to acetate II                                      | 0,21% | 0,22% | 0,07% | 0,07% | 0,74862459  |
| PWY-8020            | D-xylose degradation V                                                   | 0,06% | 0,06% | 0,04% | 0,03% | 0,751006504 |
| PWY-6459            | peptidoglycan cross-bridge biosynthesis I (S. aureus)                    | 0,01% | 0,01% | 0,01% | 0,01% | 0,751084542 |
| PWY-5364            | sulfur reduction II (via polysulfide)                                    | 0,02% | 0,02% | 0,02% | 0,02% | 0,75160739  |
| PWY0-662            | PRPP biosynthesis                                                        | 0,06% | 0,05% | 0,03% | 0,03% | 0,75228824  |
| GLYCOLATEMET-PWY    | glycolate and glyoxylate degradation I                                   | 0,00% | 0,00% | 0,01% | 0,01% | 0,753285245 |
| PWY-5704            | urea degradation II                                                      | 0,01% | 0,01% | 0,01% | 0,01% | 0,753926501 |
| PWY-8038            | naphthomycin biosynthesis                                                | 0,07% | 0,06% | 0,06% | 0,05% | 0,755518316 |
| PWY-7409            | phospholipid remodeling (phosphatidylethanolamine, yeast)                | 0,01% | 0,01% | 0,01% | 0,01% | 0,756152018 |
| KETOGLUCONMET-PWY   | ketogluconate metabolism                                                 | 0,03% | 0,02% | 0,03% | 0,02% | 0,757768605 |
| PWY0-1312           | acetate and ATP formation from acetyl-CoA I                              | 0,19% | 0,20% | 0,07% | 0,07% | 0,760417209 |
| PWY-6623            | salicylate glucosides biosynthesis II                                    | 0,00% | 0,01% | 0,01% | 0,01% | 0,760458022 |



|                     |                                                                                    |       |       |       |       |             |
|---------------------|------------------------------------------------------------------------------------|-------|-------|-------|-------|-------------|
| TRESYN-PWY          | trehalose biosynthesis I                                                           | 0,01% | 0,02% | 0,02% | 0,02% | 0,761264487 |
| PWY-7791            | UMP biosynthesis III                                                               | 0,42% | 0,45% | 0,09% | 0,17% | 0,762892434 |
| PWY-5686            | UMP biosynthesis I                                                                 | 0,35% | 0,37% | 0,18% | 0,09% | 0,763215091 |
| PWY-5863            | superpathway of phyloquinol biosynthesis                                           | 0,05% | 0,05% | 0,03% | 0,03% | 0,763773546 |
| PWY-5960            | aflatoxins B <sub>2</sub> and G <sub>2</sub> biosynthesis                          | 0,10% | 0,09% | 0,07% | 0,05% | 0,764689043 |
| GALACTCAT-PWY       | D-galactonate degradation                                                          | 0,01% | 0,01% | 0,01% | 0,01% | 0,766192137 |
| PWY-6126            | superpathway of adenosine nucleotides <i>de novo</i> biosynthesis II               | 0,22% | 0,24% | 0,09% | 0,06% | 0,766397531 |
| PWY-7380            | biotin biosynthesis from 8-amino-7-oxononanoate II                                 | 0,03% | 0,03% | 0,03% | 0,02% | 0,766441296 |
| P562-PWY            | <i>myo</i> -inositol degradation I                                                 | 0,04% | 0,04% | 0,03% | 0,03% | 0,767054447 |
| PWY-7237            | <i>myo</i> -, <i>chiro</i> - and <i>scyllo</i> -inositol degradation               | 0,04% | 0,04% | 0,03% | 0,03% | 0,767054447 |
| SULFATE-CYS-PWY     | superpathway of sulfate assimilation and cysteine biosynthesis                     | 0,23% | 0,22% | 0,08% | 0,06% | 0,768634971 |
| GLUTSYNIII-PWY      | L-glutamate biosynthesis III                                                       | 0,14% | 0,14% | 0,02% | 0,04% | 0,76901988  |
| PWY-5443            | aminopropanol phosphate biosynthesis I                                             | 0,01% | 0,01% | 0,01% | 0,01% | 0,769566362 |
| PWY-7220            | adenosine deoxyribonucleotides <i>de novo</i> biosynthesis II                      | 0,11% | 0,10% | 0,08% | 0,05% | 0,769597856 |
| P41-PWY             | pyruvate fermentation to acetate and ( <i>S</i> )-lactate I                        | 0,22% | 0,23% | 0,07% | 0,07% | 0,769825337 |
| PWY-6643            | coenzyme M biosynthesis II                                                         | 0,02% | 0,02% | 0,03% | 0,02% | 0,770457468 |
| PWY-8056            | anandamide lipoygenation                                                           | 0,31% | 0,32% | 0,06% | 0,06% | 0,771199603 |
| PWY-7242            | D-fructuronate degradation                                                         | 0,12% | 0,13% | 0,07% | 0,08% | 0,772524113 |
| PWY-5297            | siroheme amide biosynthesis                                                        | 0,00% | 0,00% | 0,00% | 0,00% | 0,773649661 |
| PWY-6282            | palmitoleate biosynthesis I (from (5Z)-dodec-5-enoate)                             | 0,10% | 0,11% | 0,04% | 0,08% | 0,777483235 |
| PHOTOALL-PWY        | oxygenic photosynthesis                                                            | 0,16% | 0,15% | 0,10% | 0,05% | 0,780178642 |
| PWY-7911            | 6'-dechloromelleolide F biosynthesis                                               | 0,18% | 0,17% | 0,07% | 0,06% | 0,78187513  |
| PWY-7910            | homofuraneol biosynthesis                                                          | 0,06% | 0,06% | 0,04% | 0,02% | 0,782245249 |
| PWY66-374           | C20 prostanoid biosynthesis                                                        | 0,06% | 0,06% | 0,04% | 0,02% | 0,782245249 |
| PWY-5507            | adenosylcobalamin biosynthesis I (anaerobic)                                       | 0,36% | 0,38% | 0,14% | 0,10% | 0,782551673 |
| PWY-821             | superpathway of sulfur amino acid biosynthesis ( <i>Saccharomyces cerevisiae</i> ) | 0,07% | 0,06% | 0,05% | 0,02% | 0,783240816 |
| PYRIDNUCSYN-PWY     | NAD <i>de novo</i> biosynthesis I (from aspartate)                                 | 0,10% | 0,11% | 0,09% | 0,04% | 0,783982915 |
| PWY-6609            | adenine and adenosine salvage III                                                  | 0,31% | 0,32% | 0,10% | 0,10% | 0,785908891 |
| PWY-6703            | preQ <sub>0</sub> biosynthesis                                                     | 0,03% | 0,03% | 0,02% | 0,01% | 0,786799913 |
| THISYNARA-PWY       | superpathway of thiamine diphosphate biosynthesis III (eukaryotes)                 | 0,04% | 0,03% | 0,03% | 0,03% | 0,789414559 |
| P183-PWY            | catechol degradation to 2-hydroxypentadienoate I                                   | 0,06% | 0,06% | 0,06% | 0,05% | 0,789899458 |
| PWY-5415            | catechol degradation I ( <i>meta</i> -cleavage pathway)                            | 0,06% | 0,06% | 0,06% | 0,05% | 0,789899458 |
| PWY-7790            | UMP biosynthesis II                                                                | 0,13% | 0,14% | 0,11% | 0,06% | 0,791277546 |
| PWY-5738            | GDP-6-deoxy-D-talose biosynthesis                                                  | 0,01% | 0,01% | 0,01% | 0,01% | 0,794312707 |
| PWY-6275            | $\beta$ -caryophyllene biosynthesis                                                | 0,01% | 0,01% | 0,01% | 0,01% | 0,794312707 |
| PWY-1               | lathyrine biosynthesis                                                             | 0,00% | 0,00% | 0,00% | 0,01% | 0,796462429 |
| HOMOSER-THRESYN-PWY | L-threonine biosynthesis                                                           | 0,04% | 0,04% | 0,02% | 0,04% | 0,797588804 |
| PWY-6405            | Rapoport-Luebering glycolytic shunt                                                | 0,01% | 0,00% | 0,01% | 0,01% | 0,797837207 |
| NADSYN-PWY          | NAD <i>de novo</i> biosynthesis II (from tryptophan)                               | 0,01% | 0,01% | 0,01% | 0,01% | 0,79802117  |
| PWY-7727            | docosahexaenoate biosynthesis IV (4-desaturase, mammals)                           | 0,12% | 0,13% | 0,05% | 0,07% | 0,798044018 |
| PWY-7328            | superpathway of UDP-glucose-derived O-antigen building blocks biosynthesis         | 0,20% | 0,19% | 0,05% | 0,08% | 0,798335589 |
| PWY-6543            | 4-aminobenzoate biosynthesis                                                       | 0,00% | 0,01% | 0,01% | 0,01% | 0,799478637 |
| PWY-6612            | superpathway of tetrahydrofolate biosynthesis                                      | 0,08% | 0,07% | 0,07% | 0,03% | 0,8000018   |
| PWY0-862            | (5Z)-dodecenoate biosynthesis I                                                    | 0,10% | 0,11% | 0,04% | 0,08% | 0,800779192 |
| PWY-5636            | 2-nitrophenol degradation                                                          | 0,01% | 0,01% | 0,01% | 0,02% | 0,801766762 |
| PWY-6530            | perchlorate reduction                                                              | 0,00% | 0,00% | 0,01% | 0,01% | 0,802137657 |

|                    |                                                                 |       |       |       |       |             |
|--------------------|-----------------------------------------------------------------|-------|-------|-------|-------|-------------|
| P162-PWY           | L-glutamate degradation V (via hydroxyglutarate)                | 0,33% | 0,34% | 0,05% | 0,06% | 0,802592911 |
| PWY-6759           | hydrogen production III                                         | 0,01% | 0,01% | 0,02% | 0,02% | 0,802665861 |
| PWY-6502           | 8-oxo-(d)GTP detoxification I                                   | 0,00% | 0,00% | 0,01% | 0,01% | 0,803418918 |
| PWY-7330           | UDP-<i>N</i>-acetyl-&beta;-L-fucosamine biosynthesis            | 0,05% | 0,05% | 0,02% | 0,04% | 0,804476789 |
| ARGASEDEG-PWY      | L-arginine degradation I (arginase pathway)                     | 0,01% | 0,02% | 0,02% | 0,02% | 0,804631971 |
| PWY-6122           | 5-aminoimidazole ribonucleotide biosynthesis II                 | 0,03% | 0,03% | 0,03% | 0,02% | 0,80500253  |
| PWY-6955           | lincomycin A biosynthesis                                       | 0,02% | 0,02% | 0,03% | 0,03% | 0,80558526  |
| PWY-7382           | lipoate biosynthesis and incorporation IV (yeast)               | 0,01% | 0,01% | 0,02% | 0,01% | 0,806782733 |
| PWY-7769           | phosalacine biosynthesis                                        | 0,01% | 0,01% | 0,01% | 0,02% | 0,807093195 |
| PWY0-1305          | L-glutamate degradation IX (via 4-aminobutanoate)               | 0,02% | 0,01% | 0,02% | 0,02% | 0,807813652 |
| PWY0-1517          | sedoheptulose bisphosphate bypass                               | 0,16% | 0,16% | 0,08% | 0,04% | 0,808031426 |
| PWY-5698           | allantoin degradation to ureidoglycolate II (ammonia producing) | 0,03% | 0,03% | 0,02% | 0,02% | 0,808597937 |
| PWY-7033           | alkane biosynthesis II                                          | 0,01% | 0,01% | 0,02% | 0,02% | 0,811219356 |
| PWY-6051           | 2,4,6-trinitrotoluene degradation                               | 0,09% | 0,10% | 0,06% | 0,05% | 0,812879282 |
| PWY-5453           | methylglyoxal degradation III                                   | 0,12% | 0,11% | 0,06% | 0,06% | 0,812907489 |
| PWY-5840           | superpathway of menaquinol-7 biosynthesis                       | 0,00% | 0,00% | 0,01% | 0,01% | 0,813943351 |
| PWY66-5            | superpathway of cholesterol biosynthesis                        | 0,00% | 0,00% | 0,01% | 0,01% | 0,813943351 |
| PWY0-1601          | cadaverine biosynthesis                                         | 0,01% | 0,01% | 0,01% | 0,01% | 0,815631272 |
| PWY-7165           | L-ascorbate biosynthesis VI (engineered pathway)                | 0,02% | 0,01% | 0,03% | 0,01% | 0,815913666 |
| PWY-5486           | pyruvate fermentation to ethanol II                             | 0,01% | 0,01% | 0,01% | 0,02% | 0,815993097 |
| PWY-5082           | L-methionine degradation III                                    | 0,01% | 0,01% | 0,01% | 0,02% | 0,815993097 |
| P101-PWY           | ectoine biosynthesis                                            | 0,13% | 0,12% | 0,04% | 0,05% | 0,816019491 |
| PWY-6756           | <i>S</i>-methyl-5'-thioadenosine degradation II                 | 0,13% | 0,14% | 0,05% | 0,04% | 0,817104427 |
| PWY-6816           | agarose degradation                                             | 0,01% | 0,01% | 0,02% | 0,01% | 0,817352535 |
| THREOCAT-PWY       | superpathway of L-threonine metabolism                          | 0,64% | 0,63% | 0,09% | 0,10% | 0,817593789 |
| PWY-6321           | homotaurine degradation                                         | 0,01% | 0,01% | 0,02% | 0,01% | 0,8218223   |
| URDEGR-PWY         | superpathway of allantoin degradation in plants                 | 0,42% | 0,43% | 0,11% | 0,06% | 0,822397961 |
| PWY-5737           | (5<i>R</i>)-carbapenem carboxylate biosynthesis                 | 0,05% | 0,05% | 0,03% | 0,04% | 0,823283638 |
| PWY-7247           | &beta;-D-glucuronide and D-glucuronate degradation              | 0,11% | 0,11% | 0,04% | 0,04% | 0,826243405 |
| PWY-5327           | superpathway of L-lysine degradation                            | 0,02% | 0,02% | 0,02% | 0,01% | 0,827095744 |
| ARGORNPROST-PWY    | L-arginine degradation (Stickland reaction)                     | 0,17% | 0,18% | 0,08% | 0,06% | 0,827202168 |
| PWY-8007           | staphylopine biosynthesis                                       | 0,03% | 0,03% | 0,04% | 0,03% | 0,827252241 |
| PWY-6857           | retinol biosynthesis                                            | 0,00% | 0,00% | 0,01% | 0,01% | 0,827297112 |
| PWY0-1546          | muropeptide degradation                                         | 0,06% | 0,06% | 0,05% | 0,03% | 0,829018714 |
| PWY-7510           | rhizoctin A and B biosynthesis                                  | 0,00% | 0,00% | 0,00% | 0,01% | 0,829090111 |
| PWY-5978           | kanosamine biosynthesis I                                       | 0,01% | 0,01% | 0,01% | 0,02% | 0,832875264 |
| PWY-6614           | tetrahydrofolate biosynthesis                                   | 0,04% | 0,05% | 0,07% | 0,02% | 0,832930435 |
| PWY8J2-1           | bacillithiol biosynthesis                                       | 0,00% | 0,00% | 0,01% | 0,01% | 0,834875955 |
| ALADEG-PWY         | L-alanine degradation I                                         | 0,02% | 0,02% | 0,03% | 0,02% | 0,83513927  |
| LARABITOLUTIL-PWY  | xylitol degradation                                             | 0,02% | 0,02% | 0,01% | 0,04% | 0,835164564 |
| PWY-6556           | pyrimidine ribonucleosides salvage II                           | 0,02% | 0,02% | 0,01% | 0,03% | 0,836211725 |
| POLYISOPRENSYN-PWY | polyisoprenoid biosynthesis (<i>E. coli</i>)                    | 0,01% | 0,01% | 0,02% | 0,01% | 0,836322072 |
| PWY-6568           | dermatan sulfate biosynthesis (late stages)                     | 0,08% | 0,09% | 0,03% | 0,04% | 0,83720222  |
| PWY-7222           | guanosine deoxyribonucleotides <i>de novo</i> biosynthesis II   | 0,13% | 0,13% | 0,10% | 0,05% | 0,839353388 |
| PWY-6628           | superpathway of L-phenylalanine biosynthesis                    | 0,16% | 0,16% | 0,02% | 0,04% | 0,840241307 |
| PWY-5123           | <i>trans, trans</i>-farnesyl diphosphate biosynthesis           | 0,02% | 0,02% | 0,02% | 0,01% | 0,840853607 |

|                           |                                                                        |       |       |       |       |             |
|---------------------------|------------------------------------------------------------------------|-------|-------|-------|-------|-------------|
| PWY-1541                  | superpathway of taurine degradation                                    | 0,09% | 0,08% | 0,05% | 0,04% | 0,841463346 |
| PWY-6694                  | oxalate degradation I                                                  | 0,26% | 0,27% | 0,06% | 0,12% | 0,841804799 |
| PWY-7980                  | ATP biosynthesis                                                       | 0,27% | 0,28% | 0,15% | 0,06% | 0,843085994 |
| PWY-6735                  | starch degradation IV                                                  | 0,00% | 0,00% | 0,01% | 0,01% | 0,844395097 |
| BRANCHED-CHAIN-AA-SYN-PWY | superpathway of branched chain amino acid biosynthesis                 | 0,39% | 0,40% | 0,09% | 0,13% | 0,844974156 |
| PWY-7991                  | toxoflavin biosynthesis                                                | 0,01% | 0,01% | 0,01% | 0,01% | 0,845570216 |
| PWY-5087                  | L-glutamate degradation VI (to pyruvate)                               | 0,09% | 0,09% | 0,05% | 0,04% | 0,849353029 |
| PWY-6383                  | mono-<i>trans</i>, poly-<i>cis</i> decaprenyl phosphate biosynthesis   | 0,03% | 0,03% | 0,02% | 0,02% | 0,849628601 |
| ASPARAGINE-BIOSYNTHESIS   | L-asparagine biosynthesis I                                            | 0,07% | 0,06% | 0,03% | 0,03% | 0,85340299  |
| PWY-6269                  | superpathway of adenosylcobalamin salvage from cobinamide II           | 0,09% | 0,10% | 0,04% | 0,05% | 0,854497025 |
| M-CRESOL-DEGRADATION-PWY  | <l>m</l>-cresol degradation                                            | 0,00% | 0,00% | 0,00% | 0,01% | 0,856200711 |
| PWY-7414                  | dTDP-&alpha;-D-mycaminose biosynthesis                                 | 0,43% | 0,43% | 0,09% | 0,09% | 0,856569552 |
| PWY-5070                  | gibberellin biosynthesis I (non C-3, non C-13 hydroxylation)           | 0,06% | 0,07% | 0,04% | 0,05% | 0,856913248 |
| PWY-7413                  | dTDP-6-deoxy-&alpha;-D-allose biosynthesis                             | 0,00% | 0,01% | 0,01% | 0,01% | 0,858197373 |
| PWY-8088                  | dipicolinate biosynthesis                                              | 0,15% | 0,14% | 0,05% | 0,04% | 0,858441866 |
| PWY-5188                  | tetrapyrrole biosynthesis I (from glutamate)                           | 0,12% | 0,12% | 0,05% | 0,05% | 0,858588453 |
| PWY-7206                  | pyrimidine deoxyribonucleotides dephosphorylation                      | 0,04% | 0,04% | 0,02% | 0,03% | 0,859033767 |
| PWY-6839                  | 2-aminoethylphosphonate biosynthesis                                   | 0,20% | 0,19% | 0,09% | 0,09% | 0,860271136 |
| PWY-8138                  | polyphosphate metabolism                                               | 0,10% | 0,10% | 0,05% | 0,06% | 0,863572263 |
| PWY-7832                  | ABH and Lewis epitopes biosynthesis from type 1 precursor disaccharide | 0,01% | 0,01% | 0,02% | 0,02% | 0,864740374 |
| PWY-5826                  | hypoglycin biosynthesis                                                | 0,01% | 0,01% | 0,02% | 0,02% | 0,864740374 |
| PWY-8077                  | ginkgotoxin biosynthesis                                               | 0,00% | 0,00% | 0,01% | 0,01% | 0,865268748 |
| PWY-5818                  | validamycin biosynthesis                                               | 0,00% | 0,00% | 0,01% | 0,01% | 0,865268748 |
| GLUTAMATE-DEG1-PWY        | L-glutamate degradation I                                              | 0,15% | 0,14% | 0,02% | 0,04% | 0,865890596 |
| PWY-5817                  | dodecaprenyl diphosphate biosynthesis                                  | 0,28% | 0,29% | 0,10% | 0,04% | 0,866312695 |
| PWY-7241                  | <l>myo</l>-inositol degradation II                                     | 0,01% | 0,01% | 0,01% | 0,01% | 0,86723274  |
| ARG+POLYAMINE-SYN         | superpathway of arginine and polyamine biosynthesis                    | 0,27% | 0,27% | 0,09% | 0,07% | 0,867928675 |
| PWY-7388                  | octanoyl-[acyl-carrier protein] biosynthesis (mitochondria, yeast)     | 0,01% | 0,01% | 0,02% | 0,01% | 0,867934363 |
| PWY-6142                  | gluconeogenesis II (<i>Methanobacterium thermoautotrophicum</i>)       | 0,33% | 0,32% | 0,10% | 0,06% | 0,868880793 |
| PWY-6333                  | acetaldehyde biosynthesis I                                            | 0,01% | 0,01% | 0,01% | 0,02% | 0,870305779 |
| PWY-7994                  | dolabralexins biosynthesis                                             | 0,05% | 0,05% | 0,04% | 0,03% | 0,870471205 |
| PWY-7752                  | gadusol biosynthesis                                                   | 0,21% | 0,20% | 0,12% | 0,08% | 0,871469606 |
| PWY-8072                  | alanine racemization                                                   | 0,02% | 0,02% | 0,03% | 0,02% | 0,871573703 |
| PWY-7845                  | heme degradation II                                                    | 0,06% | 0,06% | 0,06% | 0,05% | 0,871594582 |
| PWY-7227                  | adenosine deoxyribonucleotides <i>de novo</i> biosynthesis             | 0,08% | 0,09% | 0,06% | 0,03% | 0,872612307 |
| PWY-8039                  | mitomycin biosynthesis                                                 | 0,01% | 0,01% | 0,02% | 0,01% | 0,872733323 |
| PWY-7896                  | isoniazid activation                                                   | 0,02% | 0,02% | 0,02% | 0,01% | 0,873133889 |
| PWY-6641                  | superpathway of sulfolactate degradation                               | 0,09% | 0,08% | 0,06% | 0,04% | 0,874984075 |
| THISYN-PWY                | superpathway of thiamine diphosphate biosynthesis I                    | 0,43% | 0,42% | 0,10% | 0,09% | 0,875851718 |
| PWY-2504                  | superpathway of aromatic compound degradation via 3-oxoadipate         | 0,05% | 0,05% | 0,02% | 0,04% | 0,875852762 |
| PWY-5032                  | <i>ent</i>-kaurene biosynthesis I                                      | 0,05% | 0,05% | 0,02% | 0,04% | 0,875852762 |
| PWY-2981                  | diterpene phytoalexins precursors biosynthesis                         | 0,05% | 0,05% | 0,02% | 0,04% | 0,875852762 |
| PWY-5052                  | superpathway of gibberellin biosynthesis                               | 0,05% | 0,05% | 0,02% | 0,04% | 0,875852762 |
| PWY-5667                  | CDP-diacylglycerol biosynthesis I                                      | 0,06% | 0,06% | 0,03% | 0,04% | 0,877794717 |
| PWY-5505                  | L-glutamate and L-glutamine biosynthesis                               | 0,31% | 0,32% | 0,13% | 0,11% | 0,877812937 |
| P164-PWY                  | purine nucleobases degradation I (anaerobic)                           | 0,08% | 0,08% | 0,03% | 0,05% | 0,87798166  |

|                      |                                                                      |       |       |       |       |             |
|----------------------|----------------------------------------------------------------------|-------|-------|-------|-------|-------------|
| PHOSLIPSYN2-PWY      | superpathway of phospholipid biosynthesis II (plants)                | 0,01% | 0,01% | 0,01% | 0,01% | 0,882583092 |
| PWY0-41              | allantoin degradation IV (anaerobic)                                 | 0,07% | 0,07% | 0,06% | 0,05% | 0,883545961 |
| PWY-5651             | L-tryptophan degradation to 2-amino-3-carboxymuconate semialdehyde   | 0,01% | 0,01% | 0,01% | 0,01% | 0,886578886 |
| PWY-3502             | superpathway of NAD biosynthesis in eukaryotes                       | 0,01% | 0,01% | 0,01% | 0,01% | 0,886578886 |
| PWY-6302             | dihydroconiferyl alcohol biosynthesis                                | 0,07% | 0,06% | 0,06% | 0,03% | 0,887997561 |
| PWY-7514             | L-tyrosine degradation IV (to 4-methylphenol)                        | 0,01% | 0,01% | 0,01% | 0,01% | 0,888388574 |
| PWY-6737             | starch degradation V                                                 | 0,10% | 0,10% | 0,05% | 0,07% | 0,889064727 |
| TRYPDEG-PWY          | L-tryptophan degradation II (via pyruvate)                           | 0,01% | 0,01% | 0,01% | 0,01% | 0,889815565 |
| PWY-7767             | L-leucine degradation IV (Stickland reaction)                        | 0,04% | 0,03% | 0,06% | 0,03% | 0,892785802 |
| PWY0-1061            | superpathway of L-alanine biosynthesis                               | 0,13% | 0,13% | 0,04% | 0,04% | 0,892817873 |
| PWY-3462             | L-phenylalanine biosynthesis II                                      | 0,01% | 0,01% | 0,02% | 0,01% | 0,894805527 |
| PWY1ZNC-1            | assimilatory sulfate reduction IV                                    | 0,06% | 0,06% | 0,05% | 0,03% | 0,895164145 |
| PWY-6304             | casbene biosynthesis                                                 | 0,04% | 0,04% | 0,03% | 0,02% | 0,897762003 |
| PWY-8076             | 8-O-methylated benzoxazinoid glucoside biosynthesis                  | 0,04% | 0,04% | 0,03% | 0,02% | 0,897762003 |
| PWY-7392             | taxadiene biosynthesis (engineered)                                  | 0,26% | 0,27% | 0,04% | 0,06% | 0,89830165  |
| PWY-7111             | pyruvate fermentation to isobutanol (engineered)                     | 0,37% | 0,36% | 0,16% | 0,12% | 0,898614342 |
| PWY-6088             | 3-chlorobenzoate degradation I (via chlorocatechol)                  | 0,00% | 0,00% | 0,01% | 0,01% | 0,898901022 |
| PWY-5116             | sakuranetin biosynthesis                                             | 0,00% | 0,00% | 0,01% | 0,01% | 0,898901022 |
| PWY-7374             | 1,4-dihydroxy-6-naphthoate biosynthesis I                            | 0,01% | 0,01% | 0,01% | 0,01% | 0,899884961 |
| PWY-6263             | superpathway of menaquinol-8 biosynthesis II                         | 0,01% | 0,01% | 0,01% | 0,01% | 0,899884961 |
| PWY-7407             | aurachin A, B, C and D biosynthesis                                  | 0,00% | 0,00% | 0,01% | 0,01% | 0,901494772 |
| XYLCAT-PWY           | D-xylose degradation I                                               | 0,06% | 0,05% | 0,03% | 0,03% | 0,901644506 |
| PWY-5121             | superpathway of geranylgeranyl diphosphate biosynthesis II (via MEP) | 0,31% | 0,30% | 0,07% | 0,08% | 0,902174077 |
| NADPHOS-DEPHOS-PWY-1 | NAD phosphorylation and transhydrogenation                           | 0,02% | 0,02% | 0,04% | 0,03% | 0,903923266 |
| PWY-8097             | 5-hydroxybenzimidazole biosynthesis (anaerobic)                      | 0,00% | 0,00% | 0,01% | 0,01% | 0,904380822 |
| ARGSYN-PWY           | L-arginine biosynthesis I (via L-ornithine)                          | 0,19% | 0,19% | 0,09% | 0,06% | 0,90740085  |
| PWY0-1319            | CDP-diacylglycerol biosynthesis II                                   | 0,07% | 0,07% | 0,03% | 0,04% | 0,907402814 |
| PWY490-4             | L-asparagine biosynthesis III (tRNA-dependent)                       | 0,11% | 0,11% | 0,06% | 0,04% | 0,908035165 |
| PWY-6828             | linezolid resistance                                                 | 0,00% | 0,00% | 0,01% | 0,01% | 0,913002434 |
| PWY-5120             | geranylgeranyl diphosphate biosynthesis                              | 0,02% | 0,02% | 0,02% | 0,01% | 0,913915489 |
| PWY-7117             | C4 photosynthetic carbon assimilation cycle, PEPCK type              | 0,01% | 0,01% | 0,02% | 0,01% | 0,915179801 |
| PWY-7383             | anaerobic energy metabolism (invertebrates, cytosol)                 | 0,01% | 0,01% | 0,02% | 0,01% | 0,915179801 |
| PWY-7930             | pyoluteorin biosynthesis                                             | 0,01% | 0,01% | 0,02% | 0,02% | 0,9162732   |
| PWY-7651             | heparan sulfate degradation                                          | 0,10% | 0,10% | 0,08% | 0,07% | 0,918805188 |
| PWY-7459             | kojibiose degradation                                                | 0,00% | 0,00% | 0,01% | 0,01% | 0,918896681 |
| PWY-6507             | 4-deoxy-L-threo-hex-4-enopyranuronate degradation                    | 0,04% | 0,04% | 0,03% | 0,03% | 0,919364276 |
| PWY0-1324            | N-acetylneuraminic acid and N-acetylmannosamine degradation I        | 0,02% | 0,01% | 0,02% | 0,02% | 0,91988422  |
| PWY-6151             | S-adenosyl-L-methionine cycle I                                      | 0,19% | 0,18% | 0,08% | 0,06% | 0,92071361  |
| POLYAMSYN-PWY        | superpathway of polyamine biosynthesis I                             | 0,08% | 0,08% | 0,03% | 0,05% | 0,924290435 |
| PWY4LZ-257           | superpathway of fermentation (Chlamydomonas reinhardtii)             | 0,01% | 0,01% | 0,01% | 0,02% | 0,924525644 |
| PWY-6662             | superpathway of quinolone and alkylquinolone biosynthesis            | 0,14% | 0,14% | 0,14% | 0,07% | 0,925508139 |
| GLUGLNSYN-PWY        | L-glutamate biosynthesis IV                                          | 0,14% | 0,14% | 0,14% | 0,07% | 0,925508139 |
| PWY-6605             | adenine and adenosine salvage II                                     | 0,07% | 0,08% | 0,08% | 0,03% | 0,92635531  |
| PWY-6645             | labdane-type diterpenes biosynthesis                                 | 0,36% | 0,35% | 0,16% | 0,11% | 0,926729867 |
| SER-GLYSYN-PWY       | superpathway of L-serine and glycine biosynthesis I                  | 0,20% | 0,20% | 0,05% | 0,06% | 0,926786213 |
| PWY-6519             | 8-amino-7-oxononanoate biosynthesis I                                | 0,15% | 0,15% | 0,05% | 0,08% | 0,929829022 |

|                |                                                                 |       |       |       |       |             |
|----------------|-----------------------------------------------------------------|-------|-------|-------|-------|-------------|
| PWY-7209       | superpathway of pyrimidine ribonucleosides degradation          | 0,05% | 0,05% | 0,04% | 0,04% | 0,930125564 |
| PWY-5648       | 2-nitrobenzoate degradation II                                  | 0,01% | 0,01% | 0,01% | 0,01% | 0,932688673 |
| PWY-6808       | dTDP-D-forosamine biosynthesis                                  | 0,03% | 0,03% | 0,02% | 0,02% | 0,934033417 |
| PWY-7846       | heme degradation V                                              | 0,01% | 0,01% | 0,02% | 0,01% | 0,934673567 |
| PWY-5825       | dalpatein and dalnigrein biosynthesis                           | 0,01% | 0,01% | 0,02% | 0,01% | 0,934673567 |
| PWY-5750       | itaconate biosynthesis I                                        | 0,01% | 0,01% | 0,02% | 0,01% | 0,934673567 |
| PWY-6622       | heptadecane biosynthesis                                        | 0,01% | 0,01% | 0,02% | 0,01% | 0,934673567 |
| PWY0-1554      | 5-(methoxycarbonylmethoxy)uridine biosynthesis                  | 0,01% | 0,01% | 0,02% | 0,01% | 0,934673567 |
| PWY-5749       | itaconate degradation                                           | 0,01% | 0,01% | 0,02% | 0,01% | 0,934673567 |
| PWY-8031       | epiberberine biosynthesis                                       | 0,01% | 0,01% | 0,02% | 0,01% | 0,934673567 |
| DISSULFRED-PWY | dissimilatory sulfate reduction I (to hydrogen sulfide))        | 0,01% | 0,01% | 0,02% | 0,01% | 0,934673567 |
| P641-PWY       | phenylmercury acetate degradation                               | 0,01% | 0,01% | 0,02% | 0,01% | 0,934673567 |
| PWY-5656       | mannosylglycerate biosynthesis I                                | 0,01% | 0,01% | 0,02% | 0,01% | 0,934673567 |
| PWY-5752       | piperine biosynthesis                                           | 0,01% | 0,01% | 0,02% | 0,01% | 0,934673567 |
| PWY-8053       | anandamide biosynthesis II                                      | 0,01% | 0,01% | 0,02% | 0,01% | 0,934673567 |
| PWY0-1241      | ADP-L-<i>glycero</i>-&beta;-D-<i>manno</i>-heptose biosynthesis | 0,01% | 0,01% | 0,02% | 0,01% | 0,934673567 |
| PWY-7563       | bassianin and desmethylbassianin biosynthesis                   | 0,01% | 0,01% | 0,02% | 0,01% | 0,934673567 |
| PWY-5367       | petroselinic acid biosynthesis                                  | 0,01% | 0,01% | 0,02% | 0,01% | 0,934673567 |
| PWY-7660       | tryptophan biosynthesis                                         | 0,01% | 0,01% | 0,02% | 0,01% | 0,934673567 |
| PWY-7702       | sch210971 and sch210972 biosynthesis                            | 0,01% | 0,01% | 0,02% | 0,01% | 0,934673567 |
| PWY-7692       | bikaverin biosynthesis                                          | 0,01% | 0,01% | 0,02% | 0,01% | 0,934673567 |
| PWY-7672       | fusaric acid biosynthesis                                       | 0,01% | 0,01% | 0,02% | 0,01% | 0,934673567 |
| PWY-7670       | fusaridione A biosynthesis                                      | 0,01% | 0,01% | 0,02% | 0,01% | 0,934673567 |
| PWY-7641       | 5-hexynoate biosynthesis                                        | 0,01% | 0,01% | 0,02% | 0,01% | 0,934673567 |
| PWY-5710       | capsaicin biosynthesis                                          | 0,01% | 0,01% | 0,02% | 0,01% | 0,934673567 |
| PWY-7565       | aspyridone A biosynthesis                                       | 0,01% | 0,01% | 0,02% | 0,01% | 0,934673567 |
| PWY-7587       | oleate biosynthesis III (cyanobacteria)                         | 0,01% | 0,01% | 0,02% | 0,01% | 0,934673567 |
| PWY-7695       | aurofusarin biosynthesis                                        | 0,01% | 0,01% | 0,02% | 0,01% | 0,934673567 |
| PWY-7669       | equisetin biosynthesis                                          | 0,01% | 0,01% | 0,02% | 0,01% | 0,934673567 |
| PWY-7650       | echinocandin B biosynthesis                                     | 0,01% | 0,01% | 0,02% | 0,01% | 0,934673567 |
| PWY-7659       | viridicatumtoxin biosynthesis                                   | 0,01% | 0,01% | 0,02% | 0,01% | 0,934673567 |
| PWY-7673       | fusarin C biosynthesis                                          | 0,01% | 0,01% | 0,02% | 0,01% | 0,934673567 |
| PWY-6027       | capsiconic acid biosynthesis                                    | 0,01% | 0,01% | 0,02% | 0,01% | 0,934673567 |
| PWY-8075       | (Kdo)<sub>2</sub>-lipid A biosynthesis II (<i>P. putida</i>)    | 0,01% | 0,01% | 0,02% | 0,01% | 0,934673567 |
| PWY-7561       | tenellin biosynthesis                                           | 0,01% | 0,01% | 0,02% | 0,01% | 0,934673567 |
| PWY-7689       | 8-<i>O</i>-methylfusarubin biosynthesis                         | 0,01% | 0,01% | 0,02% | 0,01% | 0,934673567 |
| PWY-5954       | (1'-<i>S</i>,5'-<i>S</i>)-averufin biosynthesis                 | 0,01% | 0,01% | 0,02% | 0,01% | 0,934673567 |
| PWY-5366       | palmitoleate biosynthesis II (plants and bacteria)              | 0,01% | 0,01% | 0,02% | 0,01% | 0,934673567 |
| PWY-8082       | glycine lipid biosynthesis                                      | 0,01% | 0,01% | 0,02% | 0,01% | 0,934673567 |
| PWY-5989       | stearate biosynthesis II (bacteria and plants)                  | 0,01% | 0,01% | 0,02% | 0,01% | 0,934673567 |
| PWY30-355      | stearate biosynthesis III (fungi)                               | 0,01% | 0,01% | 0,02% | 0,01% | 0,934673567 |
| PWY-7746       | mycobacterial sulfolipid biosynthesis                           | 0,01% | 0,01% | 0,02% | 0,01% | 0,934673567 |
| PWY-7696       | citreisocoumarin and bikisocoumarin biosynthesis                | 0,01% | 0,01% | 0,02% | 0,01% | 0,934673567 |
| PWY-6585       | 2-methylketone biosynthesis                                     | 0,01% | 0,01% | 0,02% | 0,01% | 0,934673567 |
| PWY-6799       | fatty acid biosynthesis initiation (plant mitochondria)         | 0,01% | 0,01% | 0,02% | 0,01% | 0,934673567 |
| PWY-5156       | superpathway of fatty acid biosynthesis II (plant)              | 0,01% | 0,01% | 0,02% | 0,01% | 0,934673567 |



|                          |                                                                            |       |       |       |       |             |
|--------------------------|----------------------------------------------------------------------------|-------|-------|-------|-------|-------------|
| PWY-5142                 | acyl-[acyl-carrier protein] thioesterase pathway                           | 0,01% | 0,01% | 0,02% | 0,01% | 0,934673567 |
| PWY-5961                 | superpathway of aflatoxin biosynthesis                                     | 0,01% | 0,01% | 0,02% | 0,01% | 0,934673567 |
| PWY-7668                 | apicidin F biosynthesis                                                    | 0,01% | 0,01% | 0,02% | 0,01% | 0,934673567 |
| PWY-7596                 | superpathway of stearidonate biosynthesis (cyanobacteria)                  | 0,01% | 0,01% | 0,02% | 0,01% | 0,934673567 |
| PWY-5938                 | pyruvate fermentation to (<i>R</i>)-acetoin I                              | 0,00% | 0,00% | 0,01% | 0,01% | 0,935974826 |
| PWY-2681                 | <i>trans</i>-zeatin biosynthesis                                           | 0,02% | 0,02% | 0,03% | 0,02% | 0,936933899 |
| PWY-7848                 | heme degradation VII                                                       | 0,01% | 0,01% | 0,02% | 0,02% | 0,937051157 |
| PWY-5429                 | 1,4-dimethylbenzene degradation to 4-methylbenzoate                        | 0,01% | 0,01% | 0,02% | 0,02% | 0,937051157 |
| PWY-5428                 | 1,3-dimethylbenzene degradation to 3-methylbenzoate                        | 0,01% | 0,01% | 0,02% | 0,02% | 0,937051157 |
| TOLUENE-DEG-CATECHOL-PWY | toluene degradation to benzoate                                            | 0,01% | 0,01% | 0,02% | 0,02% | 0,937051157 |
| PWY-7089                 | taxiphyllin bioactivation                                                  | 0,01% | 0,01% | 0,01% | 0,02% | 0,937415118 |
| PWY-7336                 | UDP-<i>N</i>-acetyl-<math>\alpha</math>-D-galactosaminuronate biosynthesis | 0,04% | 0,03% | 0,05% | 0,02% | 0,937572923 |
| SORBDEG-PWY              | D-sorbitol degradation II                                                  | 0,00% | 0,00% | 0,00% | 0,01% | 0,938875453 |
| PWY-7528                 | L-methionine salvage cycle I (bacteria and plants)                         | 0,18% | 0,17% | 0,10% | 0,03% | 0,940778914 |
| PWY-4741                 | creatinine degradation III                                                 | 0,08% | 0,07% | 0,04% | 0,02% | 0,941404994 |
| PWY-7820                 | teichuronic acid biosynthesis (<i>B. subtilis</i> 168)                     | 0,14% | 0,15% | 0,06% | 0,06% | 0,941744775 |
| GALACTARDEG-PWY          | D-galactarate degradation I                                                | 0,05% | 0,05% | 0,04% | 0,02% | 0,947071456 |
| P221-PWY                 | octane oxidation                                                           | 0,00% | 0,00% | 0,01% | 0,01% | 0,947854268 |
| PWY-7694                 | zwittermicin A biosynthesis                                                | 0,01% | 0,01% | 0,01% | 0,01% | 0,949726221 |
| PWY-6517                 | <i>N</i>-acetylglucosamine degradation II                                  | 0,15% | 0,14% | 0,06% | 0,06% | 0,950870219 |
| PWY-5515                 | L-arabinose degradation II                                                 | 0,00% | 0,00% | 0,01% | 0,01% | 0,951668391 |
| GLUTORN-PWY              | L-ornithine biosynthesis I                                                 | 0,03% | 0,03% | 0,03% | 0,02% | 0,951991119 |
| METH-ACETATE-PWY         | methanogenesis from acetate                                                | 0,08% | 0,08% | 0,05% | 0,04% | 0,952010629 |
| PWY-1281                 | sulfoacetaldehyde degradation I                                            | 0,08% | 0,08% | 0,05% | 0,04% | 0,952010629 |
| PWY-6637                 | sulfolactate degradation II                                                | 0,08% | 0,08% | 0,05% | 0,04% | 0,952010629 |
| ARGDEGRAD-PWY            | L-arginine degradation V (arginine deiminase pathway)                      | 0,06% | 0,06% | 0,03% | 0,03% | 0,952062175 |
| CITRULLINE-DEG-PWY       | L-citrulline degradation                                                   | 0,06% | 0,06% | 0,03% | 0,03% | 0,952062175 |
| PWY-3982                 | uracil degradation I (reductive)                                           | 0,01% | 0,01% | 0,01% | 0,01% | 0,952971686 |
| PWY-7245                 | superpathway of NAD/NADP - NADH/NADPH interconversion (yeast)              | 0,00% | 0,00% | 0,01% | 0,01% | 0,95569969  |
| PWY-5941                 | glycogen degradation II                                                    | 0,12% | 0,11% | 0,06% | 0,07% | 0,956930058 |
| PWY-5195                 | artemisinin and arteannuin B biosynthesis                                  | 0,02% | 0,02% | 0,03% | 0,03% | 0,957324982 |
| PWY-6368                 | 3-phosphoinositide degradation                                             | 0,00% | 0,00% | 0,01% | 0,01% | 0,957866627 |
| PWY-5757                 | fosfomycin biosynthesis                                                    | 0,26% | 0,26% | 0,04% | 0,06% | 0,961753225 |
| PWY-7941                 | isorenieratene biosynthesis II (<i>Chlorobiaceae</i>)                      | 0,01% | 0,01% | 0,01% | 0,01% | 0,964292582 |
| PWY-6578                 | 8-amino-7-oxononanoate biosynthesis III                                    | 0,03% | 0,03% | 0,03% | 0,02% | 0,964851654 |
| PWY-7835                 | superpathway of glycosphingolipids biosynthesis                            | 0,01% | 0,01% | 0,01% | 0,01% | 0,96822244  |
| NADPHOS-DEPHOS-PWY       | NAD phosphorylation and dephosphorylation                                  | 0,02% | 0,02% | 0,04% | 0,02% | 0,97080394  |
| PWY4FS-13                | extended VTC2 cycle                                                        | 0,56% | 0,56% | 0,15% | 0,10% | 0,972863664 |
| PWY-5743                 | 3-hydroxypropanoate cycle                                                  | 0,01% | 0,01% | 0,01% | 0,01% | 0,973362649 |
| PWY-6270                 | isoprene biosynthesis I                                                    | 0,21% | 0,20% | 0,07% | 0,07% | 0,974913478 |
| ILEUSYN-PWY              | L-isoleucine biosynthesis I (from threonine)                               | 0,38% | 0,38% | 0,16% | 0,11% | 0,97521825  |
| PWY-5754                 | 4-hydroxybenzoate biosynthesis I (eukaryotes)                              | 0,18% | 0,18% | 0,07% | 0,05% | 0,975928956 |
| PWY-6344                 | L-ornithine degradation II (Stickland reaction)                            | 0,03% | 0,03% | 0,03% | 0,05% | 0,977170005 |
| PWY66-399                | gluconeogenesis III                                                        | 0,05% | 0,05% | 0,03% | 0,03% | 0,978199816 |
| PWY-7972                 | adenosylcobinamide-GDP salvage from cobinamide II                          | 0,09% | 0,09% | 0,03% | 0,04% | 0,978424831 |
| PWY-5094                 | naringenin glycoside biosynthesis                                          | 0,01% | 0,01% | 0,01% | 0,01% | 0,978814585 |

|               |                                                                |       |       |       |       |             |
|---------------|----------------------------------------------------------------|-------|-------|-------|-------|-------------|
| PWY-5472      | bisbenzylisoquinoline alkaloid biosynthesis                    | 0,04% | 0,04% | 0,04% | 0,02% | 0,979664713 |
| PWY-8049      | pederin biosynthesis                                           | 0,00% | 0,00% | 0,01% | 0,01% | 0,97986739  |
| PWY-5741      | ethylmalonyl-CoA pathway                                       | 0,06% | 0,07% | 0,05% | 0,03% | 0,982976424 |
| PWY-7344      | UDP-&alpha;-D-galactose biosynthesis                           | 0,09% | 0,09% | 0,06% | 0,06% | 0,983878677 |
| PWY-8128      | biotin biosynthesis from 8-amino-7-oxononanoate III            | 0,03% | 0,03% | 0,03% | 0,02% | 0,984618172 |
| PWY-5806      | all-<i>trans</i>-decaprenyl diphosphate biosynthesis           | 0,20% | 0,20% | 0,07% | 0,07% | 0,986656708 |
| PWY-7187      | pyrimidine deoxyribonucleotides <i>de novo</i> biosynthesis II | 0,14% | 0,14% | 0,08% | 0,07% | 0,989255102 |
| PWY-7560      | methylethritol phosphate pathway II                            | 0,00% | 0,00% | 0,01% | 0,01% | 0,989799061 |
| PWY-5079      | L-phenylalanine degradation III                                | 0,01% | 0,01% | 0,01% | 0,02% | 0,990047902 |
| PWY-5081      | L-tryptophan degradation VIII (to tryptophol)                  | 0,01% | 0,01% | 0,01% | 0,02% | 0,990047902 |
| PWY30-4108    | L-tyrosine degradation III                                     | 0,01% | 0,01% | 0,01% | 0,02% | 0,990047902 |
| P184-PWY      | protocatechuate degradation I (<i>meta</i>-cleavage pathway)   | 0,17% | 0,17% | 0,06% | 0,05% | 0,990402353 |
| PWY-6772      | hydrogen production V                                          | 0,02% | 0,02% | 0,05% | 0,05% | 0,991673333 |
| PWY-6123      | inosine-5'-phosphate biosynthesis I                            | 0,12% | 0,12% | 0,06% | 0,05% | 0,994020614 |
| PWY-7603      | stephacidin A biosynthesis                                     | 0,09% | 0,09% | 0,05% | 0,03% | 0,994648847 |
| PWY0-1576     | hydrogen to fumarate electron transfer                         | 0,14% | 0,14% | 0,11% | 0,07% | 0,995029238 |
| PWY-2301      | <i>myo</i>-inositol biosynthesis                               | 0,01% | 0,01% | 0,01% | 0,02% | 0,996788583 |
| CRNFORCAT-PWY | creatinine degradation I                                       | 0,02% | 0,02% | 0,02% | 0,02% | 0,996915683 |
| PWY-7343      | UDP-&alpha;-D-glucose biosynthesis I                           | 0,03% | 0,03% | 0,02% | 0,02% | 0,998299351 |
| PWY-6164      | 3-dehydroquinate biosynthesis I                                | 0,07% | 0,07% | 0,03% | 0,03% | 0,999388445 |
